# Supplementary material for: Systemic therapy in children and adolescents with mental disorders: a systematic review and meta-analysis
Source: Springer Nature journal article supplement (doi:10.1186/s12888-024-05556-y), 2024-02-14
Supplement: MOESM1 [file 26734438]

# Systemic therapy in children and adolescents with mental disorders: a systematic review and meta-analysis

David Henry Seidel<sup>1,\*</sup>, Martina Markes<sup>1</sup>, Ulrich Grouven<sup>1</sup>, Claudia-Martina Messow<sup>1</sup>, Wiebke Sieben<sup>1</sup>, Marco Knelangen<sup>1</sup>, Rieke Oelkers-Ax<sup>2</sup>, Sebastian Grümer<sup>1</sup>, Heike Kölsch<sup>1</sup>, Mandy Kromp<sup>1</sup>, Markus von Pluto Prondzinski<sup>1</sup>

<sup>1</sup> Institute for Quality and Efficiency in Health Care (Institut für Qualität und Wirtschaftlichkeit im Gesundheitswesen, IQWiG), Im Mediapark 8, 50670, Cologne, Germany

<sup>2</sup> Family Therapy Centre (Familietherapeutisches Zentrum gGmbH, FaTZ), Hermann-Walker-Straße 16, 69151 Neckargemünd, Germany

\*Correspondence: [david.seidel@iqwig.de](mailto:david.seidel@iqwig.de)

# Table of content

|                                                                                                                                  | Page      |
|----------------------------------------------------------------------------------------------------------------------------------|-----------|
| <b>List of tables</b> .....                                                                                                      | <b>3</b>  |
| <b>List of figures</b> .....                                                                                                     | <b>4</b>  |
| <b>A1 Additional file 1 – PRISMA 2020 Checklist</b> .....                                                                        | <b>6</b>  |
| <b>A2 Additional file 2 – Search strategies</b> .....                                                                            | <b>10</b> |
| <b>A2.1 Bibliographical databases</b> .....                                                                                      | <b>10</b> |
| Search for systematic reviews .....                                                                                              | 10        |
| 1. MEDLINE via Ovid.....                                                                                                         | 10        |
| 2. The Cochrane Library .....                                                                                                    | 11        |
| Search for primary studies.....                                                                                                  | 12        |
| 1. MEDLINE via Ovid.....                                                                                                         | 12        |
| 2. Embase via Ovid .....                                                                                                         | 14        |
| 3. PsycINFO via Ovid .....                                                                                                       | 15        |
| 4. The Cochrane Library via Wiley .....                                                                                          | 16        |
| <b>A2.2 Study register</b> .....                                                                                                 | <b>18</b> |
| 1. ClinicalTrials.gov .....                                                                                                      | 18        |
| 2. International Clinical Trials Registry Platform Search Portal.....                                                            | 18        |
| <b>A3 Additional file 3 – Study pool of included RTCs</b> .....                                                                  | <b>19</b> |
| <b>A4 Additional file 4 – Characteristics on included RCTs</b> .....                                                             | <b>20</b> |
| <b>A5 Additional file 5 – Risk of bias assessment</b> .....                                                                      | <b>30</b> |
| <b>A6 Additional file 6 – All results</b> .....                                                                                  | <b>32</b> |
| <b>A6.1 Tabular view – Class of mental disorders I: Affective disorders</b> .....                                                | <b>32</b> |
| <b>A6.2 Tabular view – Class of mental disorders II: Anxiety disorders</b> .....                                                 | <b>34</b> |
| <b>A6.3 Tabular view – Class of mental disorders II: Anxiety disorders and obsessive-compulsive disorders</b> .....              | <b>36</b> |
| <b>A6.4 Tabular view – Class of mental disorders III: Eating disorders</b> .....                                                 | <b>39</b> |
| <b>A6.5 Forest plots – Class of mental disorders III: Eating disorders</b> .....                                                 | <b>44</b> |
| <b>A6.6 Tabular view – Class of mental disorders IV: Hyperkinetic disorders</b> .....                                            | <b>45</b> |
| <b>A6.7 Tabular view – Class of mental disorders V: Mental and behavioural disorders due to psychoactive substance use</b> ..... | <b>48</b> |
| <b>A6.8 Forest plots – Class of mental disorders V: Mental and behavioural disorders due to psychoactive substance use</b> ..... | <b>58</b> |
| <b>References</b> .....                                                                                                          | <b>74</b> |

## List of tables

|                                                                                                                                                                                                    | <b>Page</b> |
|----------------------------------------------------------------------------------------------------------------------------------------------------------------------------------------------------|-------------|
| <b>Table 1:</b> PRISMA 2020 Checklist.....                                                                                                                                                         | 6           |
| <b>Table 2:</b> Study pool of included RTCs (extended) .....                                                                                                                                       | 19          |
| <b>Table 3:</b> Characteristics on included RCTs .....                                                                                                                                             | 20          |
| <b>Table 4:</b> Risk of bias assessment – study level.....                                                                                                                                         | 30          |
| <b>Table 5:</b> Risk of bias assessment – outcome level .....                                                                                                                                      | 31          |
| <b>Table 6:</b> Affective disorders – results for all patient-relevant outcomes with assessable data .....                                                                                         | 32          |
| <b>Table 7:</b> Anxiety disorders – results for all patient-relevant outcomes with assessable data (comparison 1: ST versus CBT) .....                                                             | 34          |
| <b>Table 8:</b> Anxiety disorders and obsessive-compulsive disorders – results for all patient-relevant outcomes with assessable data (comparison 2: ST as an add-on to CBT versus CBT alone)..... | 36          |
| <b>Table 9:</b> Eating disorders – results for all patient-relevant outcomes with assessable data ..                                                                                               | 39          |
| <b>Table 10:</b> Hyperkinetic disorders – results for all patient-relevant outcomes with assessable data .....                                                                                     | 45          |
| <b>Table 11:</b> Mental and behavioural disorders due to psychoactive substance use – results for all patient-relevant outcomes with assessable data .....                                         | 48          |

## List of figures

|                                                                                                                                                                                                                                                                                                                            | Page |
|----------------------------------------------------------------------------------------------------------------------------------------------------------------------------------------------------------------------------------------------------------------------------------------------------------------------------|------|
| <b>Figure 1:</b> Forest Plot for binge eating and compensatory behaviours after 6 months; Systemic Therapy (ST) vs. Cognitive Behavioural Therapy (CBT); Eating disorders .....                                                                                                                                            | 44   |
| <b>Figure 2:</b> Forest Plot for externalising problems (YSR) after 4 or 6 months; Systemic Therapy (ST) vs. Cognitive Behavioural Therapy (CBT); Mental and behavioural disorders due to psychoactive substance use .....                                                                                                 | 58   |
| <b>Figure 3:</b> Forest Plot for externalising problems (CBCL) after 6 months; Systemic Therapy (ST) vs. Cognitive Behavioural Therapy (CBT); Mental and behavioural disorders due to psychoactive substance use .....                                                                                                     | 59   |
| <b>Figure 4:</b> Forest Plot for externalising problems (YSR) after 12 months; Systemic Therapy (ST) vs. Cognitive Behavioural Therapy (CBT); Mental and behavioural disorders due to psychoactive substance use .....                                                                                                     | 60   |
| <b>Figure 5:</b> Forest Plot for externalising problems (CBCL) after 12 months; Systemic Therapy (ST) vs. Cognitive Behavioural Therapy (CBT); Mental and behavioural disorders due to psychoactive substance use .....                                                                                                    | 61   |
| <b>Figure 6:</b> Forest Plot for externalising problems (YSR) after 18 months; Systemic Therapy (ST) vs. Cognitive Behavioural Therapy (CBT); Mental and behavioural disorders due to psychoactive substance use .....                                                                                                     | 62   |
| <b>Figure 7:</b> Forest Plot for externalising problems (YSR) after 24 months; Systemic Therapy (ST) vs. Cognitive Behavioural Therapy (CBT); Mental and behavioural disorders due to psychoactive substance use .....                                                                                                     | 63   |
| <b>Figure 8:</b> Forest Plot for internalising problems (YSR) after 4 or 6 months; Systemic Therapy (ST) vs. Cognitive Behavioural Therapy (CBT); Mental and behavioural disorders due to psychoactive substance use .....                                                                                                 | 64   |
| <b>Figure 9:</b> Forest Plot for internalising problems (CBCL) after 6 months; Systemic Therapy (ST) vs. Cognitive Behavioural Therapy (CBT); Mental and behavioural disorders due to psychoactive substance use .....                                                                                                     | 65   |
| <b>Figure 10:</b> Forest Plot for internalising problems (YSR) after 12 months; Systemic Therapy (ST) vs. Cognitive Behavioural Therapy (CBT); Mental and behavioural disorders due to psychoactive substance use .....                                                                                                    | 66   |
| <b>Figure 11:</b> Forest Plot for internalising problems (CBCL) after 12 months; Systemic Therapy (ST) vs. Cognitive Behavioural Therapy (CBT); Mental and behavioural disorders due to psychoactive substance use .....                                                                                                   | 67   |
| <b>Figure 12:</b> Forest Plot for internalising problems (YSR) after 18 months; Systemic Therapy (ST) vs. Cognitive Behavioural Therapy (CBT); Mental and behavioural disorders due to psychoactive substance use .....                                                                                                    | 68   |
| <b>Figure 13:</b> Forest Plot for substance use problem severity after 4 or 6 months; Systemic Therapy (ST) vs. Cognitive Behavioural Therapy (CBT); Mental and behavioural disorders due to psychoactive substance use; missing standard deviation (SD) in INCANT (Switzerland) replaced by median of other studies ..... | 69   |

**Figure 14:** Forest Plot for substance use problem severity after 9 months; Systemic Therapy (ST) vs. Cognitive Behavioural Therapy (CBT); Mental and behavioural disorders due to psychoactive substance use; missing standard deviation (SD) in INCANT (Switzerland) replaced by median of other studies ..... 70

**Figure 15:** Forest Plot for substance use problem severity after 12 months; Systemic Therapy (ST) vs. Cognitive Behavioural Therapy (CBT); Mental and behavioural disorders due to psychoactive substance use; missing standard deviation (SD) in INCANT (Switzerland) replaced by median of other studies ..... 71

**Figure 16:** Forest Plot for substance use problem severity after 18 months; Systemic Therapy (ST) vs. Cognitive Behavioural Therapy (CBT); Mental and behavioural disorders due to psychoactive substance use ..... 72

**Figure 17:** Forest Plot for use of cannabis after 3 or 4 months; Systemic Therapy (ST) vs. Cognitive Behavioural Therapy (CBT); Mental and behavioural disorders due to psychoactive substance use; missing patient numbers in Waldron 2001 replaced with randomised patients..... 72

**Figure 18:** Forest Plot for use of cannabis after 6 or 7 months; Systemic Therapy (ST) vs. Cognitive Behavioural Therapy (CBT); Mental and behavioural disorders due to psychoactive substance use ..... 73

**A1 Additional file 1 – PRISMA 2020 Checklist**

retrieved on 09 February 2023 on <https://prisma-statement.org/prismastatement/Checklist.aspx?AspxAutoDetectCookieSupport=1>

Adopted from Page et al. 2021 (1) and completed

**Table 1: PRISMA 2020 Checklist**

| Section and Topic       | Item # | Checklist item                                                                                                                                                                                                                                                                                       | Location where item is reported                                                 |
|-------------------------|--------|------------------------------------------------------------------------------------------------------------------------------------------------------------------------------------------------------------------------------------------------------------------------------------------------------|---------------------------------------------------------------------------------|
| <b>TITLE</b>            |        |                                                                                                                                                                                                                                                                                                      |                                                                                 |
| Title                   | 1      | Identify the report as a systematic review.                                                                                                                                                                                                                                                          | Manuscript: Title                                                               |
| <b>ABSTRACT</b>         |        |                                                                                                                                                                                                                                                                                                      |                                                                                 |
| Abstract                | 2      | See the PRISMA 2020 for Abstracts checklist.                                                                                                                                                                                                                                                         | Manuscript: General information                                                 |
| <b>INTRODUCTION</b>     |        |                                                                                                                                                                                                                                                                                                      |                                                                                 |
| Rationale               | 3      | Describe the rationale for the review in the context of existing knowledge.                                                                                                                                                                                                                          | Manuscript: Background                                                          |
| Objectives              | 4      | Provide an explicit statement of the objective(s) or question(s) the review addresses.                                                                                                                                                                                                               | Manuscript: Background                                                          |
| <b>METHODS</b>          |        |                                                                                                                                                                                                                                                                                                      |                                                                                 |
| Eligibility criteria    | 5      | Specify the inclusion and exclusion criteria for the review and how studies were grouped for the syntheses.                                                                                                                                                                                          | Manuscript: Study eligibility, Table 1                                          |
| Information sources     | 6      | Specify all databases, registers, websites, organisations, reference lists and other sources searched or consulted to identify studies. Specify the date when each source was last searched or consulted.                                                                                            | Manuscript: Search strategy and study selection                                 |
| Search strategy         | 7      | Present the full search strategies for all databases, registers and websites, including any filters and limits used.                                                                                                                                                                                 | A2 Additional file 2: Search strategies                                         |
| Selection process       | 8      | Specify the methods used to decide whether a study met the inclusion criteria of the review, including how many reviewers screened each record and each report retrieved, whether they worked independently, and if applicable, details of automation tools used in the process.                     | Manuscript: Search strategy and study selection, Fig. 1, Authors' contributions |
| Data collection process | 9      | Specify the methods used to collect data from reports, including how many reviewers collected data from each report, whether they worked independently, any processes for obtaining or confirming data from study investigators, and if applicable, details of automation tools used in the process. | Manuscript: Data extraction, Authors' contributions                             |

**Table 1: PRISMA 2020 Checklist**

| Section and Topic             | Item # | Checklist item                                                                                                                                                                                                                                                                | Location where item is reported                                  |
|-------------------------------|--------|-------------------------------------------------------------------------------------------------------------------------------------------------------------------------------------------------------------------------------------------------------------------------------|------------------------------------------------------------------|
| Data items                    | 10a    | List and define all outcomes for which data were sought. Specify whether all results that were compatible with each outcome domain in each study were sought (e.g. for all measures, time points, analyses), and if not, the methods used to decide which results to collect. | Manuscript: Data extraction                                      |
|                               | 10b    | List and define all other variables for which data were sought (e.g. participant and intervention characteristics, funding sources). Describe any assumptions made about any missing or unclear information.                                                                  | Manuscript: Search strategy and study selection, Data extraction |
| Study risk of bias assessment | 11     | Specify the methods used to assess risk of bias in the included studies, including details of the tool(s) used, how many reviewers assessed each study and whether they worked independently, and if applicable, details of automation tools used in the process.             | Manuscript: Risk-of-bias assessment, Authors' contributions      |
| Effect measures               | 12     | Specify for each outcome the effect measure(s) (e.g. risk ratio, mean difference) used in the synthesis or presentation of results.                                                                                                                                           | Manuscript: Grading of results, Data analysis                    |
| Synthesis methods             | 13a    | Describe the processes used to decide which studies were eligible for each synthesis (e.g. tabulating the study intervention characteristics and comparing against the planned groups for each synthesis (item #5)).                                                          | Manuscript: Study eligibility, Data analysis                     |
|                               | 13b    | Describe any methods required to prepare the data for presentation or synthesis, such as handling of missing summary statistics, or data conversions.                                                                                                                         | Manuscript: Grading of results, Data analysis                    |
|                               | 13c    | Describe any methods used to tabulate or visually display results of individual studies and syntheses.                                                                                                                                                                        | Manuscript: Grading of results, Data analysis                    |
|                               | 13d    | Describe any methods used to synthesize results and provide a rationale for the choice(s). If meta-analysis was performed, describe the model(s), method(s) to identify the presence and extent of statistical heterogeneity, and software package(s) used.                   | Manuscript: Grading of results, Data analysis                    |
|                               | 13e    | Describe any methods used to explore possible causes of heterogeneity among study results (e.g. subgroup analysis, meta-regression).                                                                                                                                          | Manuscript: Data analysis                                        |
|                               | 13f    | Describe any sensitivity analyses conducted to assess robustness of the synthesized results.                                                                                                                                                                                  | Not required, as no sensitivity analysis is presented.           |
| Reporting bias assessment     | 14     | Describe any methods used to assess risk of bias due to missing results in a synthesis (arising from reporting biases).                                                                                                                                                       | Manuscript: Risk-of-bias assessment                              |
| Certainty assessment          | 15     | Describe any methods used to assess certainty (or confidence) in the body of evidence for an outcome.                                                                                                                                                                         | Manuscript: Risk-of-bias assessment, Grading of results          |

**Table 1: PRISMA 2020 Checklist**

| Section and Topic             | Item # | Checklist item                                                                                                                                                                                                                                                                       | Location where item is reported                                                             |
|-------------------------------|--------|--------------------------------------------------------------------------------------------------------------------------------------------------------------------------------------------------------------------------------------------------------------------------------------|---------------------------------------------------------------------------------------------|
| <b>RESULTS</b>                |        |                                                                                                                                                                                                                                                                                      |                                                                                             |
| Study selection               | 16a    | Describe the results of the search and selection process, from the number of records identified in the search to the number of studies included in the review, ideally using a flow diagram.                                                                                         | Manuscript: Information retrieval and study selection; Fig. 1, Table 2                      |
|                               | 16b    | Cite studies that might appear to meet the inclusion criteria, but which were excluded, and explain why they were excluded.                                                                                                                                                          | Not relevant, as already published in the HTA Report (2).                                   |
| Study characteristics         | 17     | Cite each included study and present its characteristics.                                                                                                                                                                                                                            | Manuscript: Information retrieval and study selection, Table 2, A3, A4 Additional file 3, 4 |
| Risk of bias in studies       | 18     | Present assessments of risk of bias for each included study.                                                                                                                                                                                                                         | Manuscript: Risk-of-bias assessment and certainty of results; A5 Additional file 5          |
| Results of individual studies | 19     | For all outcomes, present, for each study: (a) summary statistics for each group (where appropriate) and (b) an effect estimate and its precision (e.g. confidence/credible interval), ideally using structured tables or plots.                                                     | Manuscript: Main results, Fig. 2, Table 3, Table 4, A6 Additional file 6 – All results      |
| Results of syntheses          | 20a    | For each synthesis, briefly summarise the characteristics and risk of bias among contributing studies.                                                                                                                                                                               | Manuscript: Risk-of-bias assessment and certainty of results; A5 Additional file 5          |
|                               | 20b    | Present results of all statistical syntheses conducted. If meta-analysis was done, present for each the summary estimate and its precision (e.g. confidence/credible interval) and measures of statistical heterogeneity. If comparing groups, describe the direction of the effect. | Manuscript: Main results, Fig. 2, Table 3, Table 4, A6 Additional file 6 – All results      |
|                               | 20c    | Present results of all investigations of possible causes of heterogeneity among study results.                                                                                                                                                                                       | Manuscript: Main results, Fig. 2, Table 3, Table 4, A6 Additional file 6 – All results      |
|                               | 20d    | Present results of all sensitivity analyses conducted to assess the robustness of the synthesized results.                                                                                                                                                                           | Not required, as no sensitivity analysis is presented.                                      |
| Reporting biases              | 21     | Present assessments of risk of bias due to missing results (arising from reporting biases) for each synthesis assessed.                                                                                                                                                              | Manuscript: Risk-of-bias assessment and certainty of results; A5 Additional file 5          |
| Certainty of evidence         | 22     | Present assessments of certainty (or confidence) in the body of evidence for each outcome assessed.                                                                                                                                                                                  | Manuscript: Main results, Fig. 2, Table 3, Table 4, A6 Additional file 6 – All results      |



**Table 1: PRISMA 2020 Checklist**

| Section and Topic                              | Item # | Checklist item                                                                                                                                                                                                                             | Location where item is reported                                   |
|------------------------------------------------|--------|--------------------------------------------------------------------------------------------------------------------------------------------------------------------------------------------------------------------------------------------|-------------------------------------------------------------------|
| <b>DISCUSSION</b>                              |        |                                                                                                                                                                                                                                            |                                                                   |
| Discussion                                     | 23a    | Provide a general interpretation of the results in the context of other evidence.                                                                                                                                                          | Manuscript: Summary of results; Comparison with previous research |
|                                                | 23b    | Discuss any limitations of the evidence included in the review.                                                                                                                                                                            | Manuscript: Strengths and limitations                             |
|                                                | 23c    | Discuss any limitations of the review processes used.                                                                                                                                                                                      | Manuscript: Strengths and limitations                             |
|                                                | 23d    | Discuss implications of the results for practice, policy, and future research.                                                                                                                                                             | Manuscript: Conclusions                                           |
| <b>OTHER INFORMATION</b>                       |        |                                                                                                                                                                                                                                            |                                                                   |
| Registration and protocol                      | 24a    | Provide registration information for the review, including register name and registration number, or state that the review was not registered.                                                                                             | Manuscript: General information                                   |
|                                                | 24b    | Indicate where the review protocol can be accessed, or state that a protocol was not prepared.                                                                                                                                             | Manuscript: General information                                   |
|                                                | 24c    | Describe and explain any amendments to information provided at registration or in the protocol.                                                                                                                                            | Manuscript: General information                                   |
| Support                                        | 25     | Describe sources of financial or non-financial support for the review, and the role of the funders or sponsors in the review.                                                                                                              | Manuscript: Funding                                               |
| Competing interests                            | 26     | Declare any competing interests of review authors.                                                                                                                                                                                         | Manuscript: Competing interests                                   |
| Availability of data, code and other materials | 27     | Report which of the following are publicly available and where they can be found: template data collection forms; data extracted from included studies; data used for all analyses; analytic code; any other materials used in the review. | Manuscript: Availability of data and materials                    |

## A2 Additional file 2 – Search strategies

### A2.1 Bibliographical databases

#### Search for systematic reviews

##### 1. MEDLINE via Ovid

- Ovid MEDLINE(R) ALL 1946 to November 27, 2019

Adoption of the following search filters:

- Systematic reviews: Wong (3) – High specificity strategy

| #  | Searches                                                                                                            |
|----|---------------------------------------------------------------------------------------------------------------------|
| 1  | exp psychotherapy/                                                                                                  |
| 2  | Stress, Psychological/th                                                                                            |
| 3  | psychotherap*.ti,ab.                                                                                                |
| 4  | or/1-3                                                                                                              |
| 5  | (family adj3 (psychotherap* or therap* or intervention* or treatment*)).ti,ab.                                      |
| 6  | (couple* adj1 (therap* or treatment*)).ti,ab.                                                                       |
| 7  | ((group or systemic* or strategic* or paradoxical* or conjoint* or marital* or multisystemic*) adj1 therap*).ti,ab. |
| 8  | (solution-focused* adj3 therap*).ti,ab.                                                                             |
| 9  | or/5-8                                                                                                              |
| 10 | and/4,9                                                                                                             |
| 11 | cochrane database of systematic reviews.jn.                                                                         |
| 12 | (search or MEDLINE or systematic review).tw.                                                                        |
| 13 | meta analysis.pt.                                                                                                   |
| 14 | or/11-13                                                                                                            |
| 15 | 14 not (exp animals/ not humans.sh.)                                                                                |
| 16 | and/10,15                                                                                                           |
| 17 | 16 and (english or german).lg.                                                                                      |
| 18 | ../ 17 yr=2012-Current                                                                                              |

- Ovid MEDLINE(R) ALL 1946 to June 30, 2021

Adoption of the following search filters:

- Systematic reviews: Wong (3) – High specificity strategy

| #  | Searches                                                                                                              |
|----|-----------------------------------------------------------------------------------------------------------------------|
| 1  | exp psychotherapy/                                                                                                    |
| 2  | psychotherap*.ti,ab.                                                                                                  |
| 3  | or/1-2                                                                                                                |
| 4  | (family adj3 (psychotherap* or therap* or intervention* or treatment*)).ti,ab.                                        |
| 5  | ((group or systemic* or strategic* or paradoxical* or conjoint* or multisystemic* or ecosystem*) adj1 therap*).ti,ab. |
| 6  | (solution-focused* adj3 therap*).ti,ab.                                                                               |
| 7  | or/4-6                                                                                                                |
| 8  | and/3,7                                                                                                               |
| 9  | cochrane database of systematic reviews.jn.                                                                           |
| 10 | (search or MEDLINE or systematic review).tw.                                                                          |
| 11 | meta analysis.pt.                                                                                                     |
| 12 | or/9-11                                                                                                               |
| 13 | 12 not (exp animals/ not humans.sh.)                                                                                  |
| 14 | and/8,13                                                                                                              |
| 15 | 14 and (english or german).lg.                                                                                        |
| 16 | ..l/ 15 yr=2012-Current                                                                                               |

## 2. The Cochrane Library

- Cochrane Database of Systematic Reviews: Issue 12 of 12, December 2019

| #   | Searches                                                                                                                |
|-----|-------------------------------------------------------------------------------------------------------------------------|
| #1  | MeSH descriptor: [Psychotherapy] explode all trees                                                                      |
| #2  | MeSH descriptor: [Stress, Psychological] this term only and with qualifier(s): [therapy - TH]                           |
| #3  | psychotherap*.ti,ab                                                                                                     |
| #4  | #1 or #2 or #3                                                                                                          |
| #5  | (family near/3 (psychotherap* or therap* or intervention* or treatment*)):ti,ab                                         |
| #6  | (couple* near/1 (therap* or treatment*)):ti,ab                                                                          |
| #7  | ((group or systemic* or strategic* or paradoxical* or conjoint* or marital* or multisystemic*) near/1 therap*):ti,ab    |
| #8  | (solution-focused* near/3 therap*):ti,ab                                                                                |
| #9  | #5 or #6 or #7 or #8                                                                                                    |
| #10 | #4 and #9 with Cochrane Library publication date Between Jan 2012 and Dec 2019, in Cochrane Reviews, Cochrane Protocols |

- Cochrane Database of Systematic Reviews: Issue 7 of 12, July 2021

| #  | Searches                                                                                                                |
|----|-------------------------------------------------------------------------------------------------------------------------|
| #1 | MeSH descriptor: [Psychotherapy] explode all trees                                                                      |
| #2 | psychotherap*:ti,ab                                                                                                     |
| #3 | #1 or #2                                                                                                                |
| #4 | (family near/3 (psychotherap* or therap* or intervention* or treatment*)):ti,ab                                         |
| #5 | ((group or systemic* or strategic* or paradoxical* or conjoint* or multisystemic* or ecosystem*) near/1 therap*):ti,ab  |
| #6 | (solution-focused* near/3 therap*):ti,ab                                                                                |
| #7 | #4 OR #5 OR #6                                                                                                          |
| #8 | #3 AND #7 with Cochrane Library publication date Between Jan 2012 and Jul 2021, in Cochrane Reviews, Cochrane Protocols |

## Search for primary studies

### 1. MEDLINE via Ovid

- Ovid MEDLINE(R) 1946 to July 11, 2022

Adoption of the following search filters:

- RCT: Lefebvre (4) – Cochrane Highly Sensitive Search Strategy for identifying randomized trials in MEDLINE: sensitivity-maximizing version (2008 revision)

| #  | Searches                                                                                                                                                                                                                                                                                                                                                                                           |
|----|----------------------------------------------------------------------------------------------------------------------------------------------------------------------------------------------------------------------------------------------------------------------------------------------------------------------------------------------------------------------------------------------------|
| 1  | exp psychotherapy/                                                                                                                                                                                                                                                                                                                                                                                 |
| 2  | psychotherap*.ti,ab.                                                                                                                                                                                                                                                                                                                                                                               |
| 3  | or/1-2                                                                                                                                                                                                                                                                                                                                                                                             |
| 4  | (family adj3 (psychotherap* or therap* or intervention* or treatment*)).ti,ab.                                                                                                                                                                                                                                                                                                                     |
| 5  | ((group or systemic* or strategic* or paradoxical* or conjoint* or multisystemic* or ecosystem*) adj1 therap*).ti,ab.                                                                                                                                                                                                                                                                              |
| 6  | (solution-focused* adj3 therap*).ti,ab.                                                                                                                                                                                                                                                                                                                                                            |
| 7  | or/4-6                                                                                                                                                                                                                                                                                                                                                                                             |
| 8  | and/3,7                                                                                                                                                                                                                                                                                                                                                                                            |
| 9  | exp pediatrics/                                                                                                                                                                                                                                                                                                                                                                                    |
| 10 | (infan* or newborn* or new-born or perinat* or neonat* or baby or baby* or babies or toddler* or minors or minors* or boy or boys or boyfriend or boyhood or girl* or kid or kids or child or child* or children* or schoolchild* or schoolchild or adolescen* or juvenil* or youth* or teen* or under*age* or pubescen* or pediatric* or paediatric* or peadiatric* or prematur* or preterm*).af. |
| 11 | (school child or school child* or school or school*).ti,ab.                                                                                                                                                                                                                                                                                                                                        |
| 12 | young adult/                                                                                                                                                                                                                                                                                                                                                                                       |
| 13 | ((young adj2 (adult* or person* or individual* or people* or population* or man or men or wom#n)) or student*).ti,ab.                                                                                                                                                                                                                                                                              |
| 14 | or/9-13                                                                                                                                                                                                                                                                                                                                                                                            |
| 15 | randomized controlled trial.pt.                                                                                                                                                                                                                                                                                                                                                                    |
| 16 | controlled clinical trial.pt.                                                                                                                                                                                                                                                                                                                                                                      |
| 17 | (randomized or placebo or randomly or trial or groups).ab.                                                                                                                                                                                                                                                                                                                                         |
| 18 | drug therapy.fs.                                                                                                                                                                                                                                                                                                                                                                                   |
| 19 | or/15-18                                                                                                                                                                                                                                                                                                                                                                                           |
| 20 | 19 not (exp animals/ not humans.sh.)                                                                                                                                                                                                                                                                                                                                                               |
| 21 | and/8,14,20                                                                                                                                                                                                                                                                                                                                                                                        |
| 22 | 21 not (comment or editorial).pt.                                                                                                                                                                                                                                                                                                                                                                  |

- Ovid MEDLINE(R) Epub Ahead of Print and In-Process, In-Data-Review & Other Non-Indexed Citations July 11, 2022

| #  | Searches                                                                                                                                                                                                                                                                                                                                                                                           |
|----|----------------------------------------------------------------------------------------------------------------------------------------------------------------------------------------------------------------------------------------------------------------------------------------------------------------------------------------------------------------------------------------------------|
| 1  | psychotherap*.ti,ab.                                                                                                                                                                                                                                                                                                                                                                               |
| 2  | (family adj3 (psychotherap* or therap* or intervention* or treatment*)).ti,ab.                                                                                                                                                                                                                                                                                                                     |
| 3  | ((group or systemic* or strategic* or paradoxical* or conjoint* or multisystemic* or ecosystem*) adj1 therap*).ti,ab.                                                                                                                                                                                                                                                                              |
| 4  | (solution-focused* adj3 therap*).ti,ab.                                                                                                                                                                                                                                                                                                                                                            |
| 5  | or/2-4                                                                                                                                                                                                                                                                                                                                                                                             |
| 6  | 1 and 5                                                                                                                                                                                                                                                                                                                                                                                            |
| 7  | (infan* or newborn* or new-born or perinat* or neonat* or baby or baby* or babies or toddler* or minors or minors* or boy or boys or boyfriend or boyhood or girl* or kid or kids or child or child* or children* or schoolchild* or schoolchild or adolescen* or juvenil* or youth* or teen* or under*age* or pubescen* or pediatric* or paediatric* or peadiatric* or prematur* or preterm*).af. |
| 8  | (school child or school child* or school or school*).ti,ab.                                                                                                                                                                                                                                                                                                                                        |
| 9  | ((young adj2 (adult* or person* or individual* or people* or population* or man or men or wom#n)) or student*).ti,ab.                                                                                                                                                                                                                                                                              |
| 10 | or/7-9                                                                                                                                                                                                                                                                                                                                                                                             |
| 11 | (clinical trial* or random* or placebo).ti,ab.                                                                                                                                                                                                                                                                                                                                                     |
| 12 | trial.ti.                                                                                                                                                                                                                                                                                                                                                                                          |
| 13 | or/11-12                                                                                                                                                                                                                                                                                                                                                                                           |
| 14 | and/6,10,13                                                                                                                                                                                                                                                                                                                                                                                        |
| 15 | 14 not (comment or editorial).pt.                                                                                                                                                                                                                                                                                                                                                                  |

## 2. Embase via Ovid

- Embase 1974 to 2022 July 08

Adoption of the following search filters:

- RCT: Wong (3) – High sensitivity strategy

| #  | Searches                                                                                                                                                                                                                                                                                                                                                                                           |
|----|----------------------------------------------------------------------------------------------------------------------------------------------------------------------------------------------------------------------------------------------------------------------------------------------------------------------------------------------------------------------------------------------------|
| 1  | exp psychiatric treatment/                                                                                                                                                                                                                                                                                                                                                                         |
| 2  | psychotherap*.ti,ab.                                                                                                                                                                                                                                                                                                                                                                               |
| 3  | or/1-2                                                                                                                                                                                                                                                                                                                                                                                             |
| 4  | (family adj3 (psychotherap* or therap* or intervention* or treatment*)).ti,ab.                                                                                                                                                                                                                                                                                                                     |
| 5  | ((group or systemic* or strategic* or paradoxical* or conjoint* or multisystemic* or ecosystem*) adj1 therap*).ti,ab.                                                                                                                                                                                                                                                                              |
| 6  | (solution-focused* adj3 therap*).ti,ab.                                                                                                                                                                                                                                                                                                                                                            |
| 7  | or/4-6                                                                                                                                                                                                                                                                                                                                                                                             |
| 8  | and/3,7                                                                                                                                                                                                                                                                                                                                                                                            |
| 9  | exp pediatrics/                                                                                                                                                                                                                                                                                                                                                                                    |
| 10 | (infan* or newborn* or new-born or perinat* or neonat* or baby or baby* or babies or toddler* or minors or minors* or boy or boys or boyfriend or boyhood or girl* or kid or kids or child or child* or children* or schoolchild* or schoolchild or adolescen* or juvenil* or youth* or teen* or under*age* or pubescen* or pediatric* or paediatric* or peadiatric* or prematur* or preterm*).af. |
| 11 | (school child or school child* or school or school*).ti,ab.                                                                                                                                                                                                                                                                                                                                        |
| 12 | young adult/                                                                                                                                                                                                                                                                                                                                                                                       |
| 13 | ((young adj2 (adult* or person* or individual* or people* or population* or man or men or wom#n)) or student*).ti,ab.                                                                                                                                                                                                                                                                              |
| 14 | or/9-11                                                                                                                                                                                                                                                                                                                                                                                            |
| 15 | random*.tw.                                                                                                                                                                                                                                                                                                                                                                                        |
| 16 | clinical trial*.mp.                                                                                                                                                                                                                                                                                                                                                                                |
| 17 | exp health care quality/                                                                                                                                                                                                                                                                                                                                                                           |
| 18 | or/15-17                                                                                                                                                                                                                                                                                                                                                                                           |
| 19 | 18 not (exp animal/ not exp human/)                                                                                                                                                                                                                                                                                                                                                                |
| 20 | and/8,14,19                                                                                                                                                                                                                                                                                                                                                                                        |
| 21 | 20 not medline.cr.                                                                                                                                                                                                                                                                                                                                                                                 |
| 22 | 21 not (Conference Abstract or Conference Review or Editorial).pt.                                                                                                                                                                                                                                                                                                                                 |

### 3. PsycINFO via Ovid

- APA PsycINFO 1806 to July Week 1 2022

Adoption of the following search filters:

- RCT: Eady (5) – Combination of terms – small drop in specificity with a substantive gain in sensitivity

| #  | Searches                                                                                                                                                                                                                                                                                                                                                                                           |
|----|----------------------------------------------------------------------------------------------------------------------------------------------------------------------------------------------------------------------------------------------------------------------------------------------------------------------------------------------------------------------------------------------------|
| 1  | exp psychiatric treatment/                                                                                                                                                                                                                                                                                                                                                                         |
| 2  | psychotherap*.ti,ab.                                                                                                                                                                                                                                                                                                                                                                               |
| 3  | or/1-2                                                                                                                                                                                                                                                                                                                                                                                             |
| 4  | (family adj3 (psychotherap* or therap* or intervention* or treatment*)).ti,ab.                                                                                                                                                                                                                                                                                                                     |
| 5  | ((group or systemic* or strategic* or paradoxical* or conjoint* or multisystemic* or ecosystem*) adj1 therap*).ti,ab.                                                                                                                                                                                                                                                                              |
| 6  | (solution-focused* adj3 therap*).ti,ab.                                                                                                                                                                                                                                                                                                                                                            |
| 7  | or/4-6                                                                                                                                                                                                                                                                                                                                                                                             |
| 8  | and/3,7                                                                                                                                                                                                                                                                                                                                                                                            |
| 9  | exp pediatrics/                                                                                                                                                                                                                                                                                                                                                                                    |
| 10 | (infan* or newborn* or new-born or perinat* or neonat* or baby or baby* or babies or toddler* or minors or minors* or boy or boys or boyfriend or boyhood or girl* or kid or kids or child or child* or children* or schoolchild* or schoolchild or adolescen* or juvenil* or youth* or teen* or under*age* or pubescen* or pediatric* or paediatric* or peadiatric* or prematur* or preterm*).af. |
| 11 | (school child or school child* or school or school*).ti,ab.                                                                                                                                                                                                                                                                                                                                        |
| 12 | young adult/                                                                                                                                                                                                                                                                                                                                                                                       |
| 13 | ((young adj2 (adult* or person* or individual* or people* or population* or man or men or wom#n)) or student*).ti,ab.                                                                                                                                                                                                                                                                              |
| 14 | or/9-11                                                                                                                                                                                                                                                                                                                                                                                            |
| 15 | random*.tw.                                                                                                                                                                                                                                                                                                                                                                                        |
| 16 | clinical trial*.mp.                                                                                                                                                                                                                                                                                                                                                                                |
| 17 | exp health care quality/                                                                                                                                                                                                                                                                                                                                                                           |
| 18 | or/15-17                                                                                                                                                                                                                                                                                                                                                                                           |
| 19 | 18 not (exp animal/ not exp human/)                                                                                                                                                                                                                                                                                                                                                                |
| 20 | and/8,14,19                                                                                                                                                                                                                                                                                                                                                                                        |
| 21 | 20 not medline.cr.                                                                                                                                                                                                                                                                                                                                                                                 |
| 22 | 21 not (Conference Abstract or Conference Review or Editorial).pt.                                                                                                                                                                                                                                                                                                                                 |

#### 4. The Cochrane Library via Wiley

- Cochrane Central Register of Controlled Trials: Issue 7 of 12, July 2022



| #   | Searches                                                                                                                                                                                                                                                                                                                                                                                     |
|-----|----------------------------------------------------------------------------------------------------------------------------------------------------------------------------------------------------------------------------------------------------------------------------------------------------------------------------------------------------------------------------------------------|
| #1  | [mh "psychotherapy"]                                                                                                                                                                                                                                                                                                                                                                         |
| #2  | psychotherap*:ti,ab                                                                                                                                                                                                                                                                                                                                                                          |
| #3  | #1 or #2                                                                                                                                                                                                                                                                                                                                                                                     |
| #4  | (family NEAR/3 (psychotherap* or therap* or intervention* or treatment*)):ti,ab                                                                                                                                                                                                                                                                                                              |
| #5  | ((group or systemic* or strategic* or paradoxical* or conjoint* or multisystemic* or ecosystem*) NEAR/1 therap*):ti,ab                                                                                                                                                                                                                                                                       |
| #6  | (solution-focused* NEAR/3 therap*):ti,ab                                                                                                                                                                                                                                                                                                                                                     |
| #7  | #4 or #5 or #6                                                                                                                                                                                                                                                                                                                                                                               |
| #8  | #3 and #7                                                                                                                                                                                                                                                                                                                                                                                    |
| #9  | [mh "pediatrics"]                                                                                                                                                                                                                                                                                                                                                                            |
| #10 | infan* or newborn* or new-born or perinat* or neonat* or baby or baby* or babies or toddler* or minors or minors* or boy or boys or boyfriend or boyhood or girl* or kid or kids or child or child* or children* or schoolchild* or schoolchild or adolescen* or juvenil* or youth* or teen* or under*age* or pubescen* or pediatric* or paediatric* or peadiatric* or prematur* or preterm* |
| #11 | (school child or school child* or school or school*):ti,ab                                                                                                                                                                                                                                                                                                                                   |
| #12 | [mh ^"young adult"]                                                                                                                                                                                                                                                                                                                                                                          |
| #13 | ((young NEAR/2 (adult* or person* or individual* or people* or population* or man or men or wom#n)) or student*):ti,ab                                                                                                                                                                                                                                                                       |
| #14 | #9 or #10 or #11 or #12 or #13                                                                                                                                                                                                                                                                                                                                                               |
| #15 | #8 AND #14 in Trials                                                                                                                                                                                                                                                                                                                                                                         |

## A2.2 Study register

### 1. ClinicalTrials.gov

**Provider: U.S. National Institutes of Health**

- URL: <http://www.clinicaltrials.gov>
- Input interface: Expert Search

| Search strategy                                                                                                                                                                                                                                                                                                                                                                                                                               |
|-----------------------------------------------------------------------------------------------------------------------------------------------------------------------------------------------------------------------------------------------------------------------------------------------------------------------------------------------------------------------------------------------------------------------------------------------|
| ( EXPAND[Concept] "family therapy" OR EXPAND[Concept] "family intervention" OR EXPAND[Concept] "family treatment" OR EXPAND[Concept] "group therapy" OR EXPAND[Concept] "strategic therapy" OR EXPAND[Concept] "paradoxical therapy" OR EXPAND[Concept] "conjoint therapy" OR EXPAND[Concept] "solution-focused" OR "multisystemic therapy" OR psychotherapy AND ( group OR family ) ) AND AREA[StdAge] EXPAND[Term] COVER[FullMatch] "Child" |

### 2. International Clinical Trials Registry Platform Search Portal

**Provider: World Health Organization**

- URL: <https://trialssearch.who.int>
- Input interface: Standard Search

| Search strategy                                                                                                                                                                                                                                                                                                |
|----------------------------------------------------------------------------------------------------------------------------------------------------------------------------------------------------------------------------------------------------------------------------------------------------------------|
| "family therapy" OR "family intervention" OR "family treatment" OR "family based" OR "group therapy" OR "strategic therapy" OR "paradoxical therapy" OR "conjoint therapy" OR "solution-focused" OR "multisystemic therapy" OR ((family OR group) AND psychotherapy) // Search for clinical trials in children |

**A3 Additional file 3 – Study pool of included RTCs****Table 2:** Study pool of included RTCs (extended)

| No.                                                                                            | Study               | Full publication (in journals) | Register entry / result report from study registers |
|------------------------------------------------------------------------------------------------|---------------------|--------------------------------|-----------------------------------------------------|
| Class of mental disorder I: Affective disorders                                                |                     |                                |                                                     |
| 1                                                                                              | Brent 1997          | yes (6-19)                     | no                                                  |
| Class of mental disorder II: Anxiety disorders and obsessive-compulsive disorders              |                     |                                |                                                     |
| 2                                                                                              | Lebowitz 2020       | yes (20)                       | no                                                  |
| 3                                                                                              | Peris 2013          | yes (21-23)                    | yes (24) / no                                       |
| 4                                                                                              | Siqueland 2005      | yes (25)                       | no                                                  |
| Class of mental disorder III: Eating disorders                                                 |                     |                                |                                                     |
| 5                                                                                              | Le Grange 2015      | yes (26-29)                    | yes (30) / no                                       |
| 6                                                                                              | Nyman-Carlsson 2019 | yes (31, 32)                   | yes (33) / no                                       |
| 7                                                                                              | Schmidt 2007        | yes (34-36)                    | yes (37) / no                                       |
| Class of mental disorder IV: Hyperkinetic disorders                                            |                     |                                |                                                     |
| 8                                                                                              | Boyer 2015          | yes (38-40)                    | yes (41) / no                                       |
| Class of mental disorder V: Mental and behavioural disorders due to psychoactive substance use |                     |                                |                                                     |
| 9                                                                                              | CYT                 | yes (42-48)                    | no                                                  |
| 10                                                                                             | Dakof 2015          | yes (49)                       | yes (50) / no                                       |
| 11                                                                                             | INCANT              | yes (51-71)                    | yes <sup>a</sup> (72, 73) / no                      |
| 12                                                                                             | Liddle 2008         | yes (74-81)                    | no                                                  |
| 13                                                                                             | Liddle 2018         | yes (82)                       | yes (83) / no                                       |
| 14                                                                                             | Slesnick 2013       | yes (84-88)                    | no                                                  |
| 15                                                                                             | Waldron 2001        | yes (89, 90)                   | no                                                  |

a. Entries in the study registry for INCANT: ISRCTN51014277 for the total sample, ISRCTN00179361 for the Dutch sample.

**A4 Additional file 4 – Characteristics on included RCTs****Table 3:** Characteristics on included RCTs [alphabetical order] (multipage Table)

| Class of mental disorder | No. Study                | ST [n] vs. Comparator [n]                                                                                                                                                                             | N total | Diagnosed disorders in %                                                                                                                                        | Country | Patient relevant outcomes                                                                   | Mean age (Range) in years | Sex f / m in % |
|--------------------------|--------------------------|-------------------------------------------------------------------------------------------------------------------------------------------------------------------------------------------------------|---------|-----------------------------------------------------------------------------------------------------------------------------------------------------------------|---------|---------------------------------------------------------------------------------------------|---------------------------|----------------|
| I: Affective disorders   | 1<br>▪ Brent 1997 (6-19) | ▪ Systemic Behaviour Family Therapy (SBFT) [n = 35] vs. Cognitive Behaviour Therapy (CBT) [n = 37]<br><br>▪ Study arm: Nondirective Supportive Treatment (not relevant for this publication) [n = 35] | ▪ 107   | ▪ Major depression disorder (100)<br>▪ Anxiety disorder (32)<br>▪ Dysthymic disorder (22)<br>▪ Disruptive disorder (21)<br>▪ Oppositional defiant disorder (16) | ▪ USA   | ▪ Depressive symptoms<br>▪ Major depression<br>▪ Overall functioning<br>▪ Suicidal ideation | ▪ 16 (13 – 18)            | ▪ 76 / 24      |

**Table 3:** Characteristics on included RCTs [alphabetical order] (multipage Table)

| <b>Class of mental disorder</b>                          | <b>No. Study</b> | <b>ST [n] vs. Comparator [n]</b>                                       | <b>N total</b>                                                                                                                                                                        | <b>Diagnosed disorders in %</b>                         | <b>Country</b>                                                                                                                                                                                                                        | <b>Patient relevant outcomes</b>                        | <b>Mean age (Range) in years</b>                                                                                                                                                                                     | <b>Sex f / m in %</b>                                                              |
|----------------------------------------------------------|------------------|------------------------------------------------------------------------|---------------------------------------------------------------------------------------------------------------------------------------------------------------------------------------|---------------------------------------------------------|---------------------------------------------------------------------------------------------------------------------------------------------------------------------------------------------------------------------------------------|---------------------------------------------------------|----------------------------------------------------------------------------------------------------------------------------------------------------------------------------------------------------------------------|------------------------------------------------------------------------------------|
| II: Anxiety disorders and obsessive-compulsive disorders | 2                | <ul style="list-style-type: none"> <li>▪ Lebowitz 2020 (20)</li> </ul> | <ul style="list-style-type: none"> <li>▪ Supportive Parenting for Anxious Childhood Emotions (SPACE) [n = 64] vs. Child-based Cognitive Behavioural Therapy (CBT) [n = 60]</li> </ul> | <ul style="list-style-type: none"> <li>▪ 124</li> </ul> | <ul style="list-style-type: none"> <li>▪ Any anxiety disorder (100)</li> <li>▪ Generalised anxiety disorder (35)</li> <li>▪ Social phobia (35)</li> <li>▪ Separation anxiety disorder (18)</li> <li>▪ Specific phobia (12)</li> </ul> | <ul style="list-style-type: none"> <li>▪ USA</li> </ul> | <ul style="list-style-type: none"> <li>▪ Anxiety symptoms</li> <li>▪ Overall improvement in clinical condition</li> <li>▪ Overall severity of clinical condition</li> <li>▪ Remission of anxiety disorder</li> </ul> | <ul style="list-style-type: none"> <li>▪ 10 (7 – 14)</li> <li>▪ 53 / 47</li> </ul> |

**Table 3:** Characteristics on included RCTs [alphabetical order] (multipage Table)

| Class of mental disorder                                        | No. Study | ST [n] vs. Comparator [n]                                              | N total                                                                                                                                                                                                       | Diagnosed disorders in %                               | Country                                                                                                                                                                                                                                                                                                                                                                                                                                               | Patient relevant outcomes                               | Mean age (Range) in years                                                                                                                            | Sex f / m in %                                                  |                                                             |
|-----------------------------------------------------------------|-----------|------------------------------------------------------------------------|---------------------------------------------------------------------------------------------------------------------------------------------------------------------------------------------------------------|--------------------------------------------------------|-------------------------------------------------------------------------------------------------------------------------------------------------------------------------------------------------------------------------------------------------------------------------------------------------------------------------------------------------------------------------------------------------------------------------------------------------------|---------------------------------------------------------|------------------------------------------------------------------------------------------------------------------------------------------------------|-----------------------------------------------------------------|-------------------------------------------------------------|
| <b>II: Anxiety disorders and obsessive-compulsive disorders</b> | <b>3</b>  | <ul style="list-style-type: none"> <li>▪ Peris 2013 (21-24)</li> </ul> | <ul style="list-style-type: none"> <li>▪ Positive Family Interaction Therapy (PFIT) + Exposure and Response Prevention [n = 32] vs. Standard Treatment (Exposure and Response Prevention) [n = 30]</li> </ul> | <ul style="list-style-type: none"> <li>▪ 62</li> </ul> | <ul style="list-style-type: none"> <li>▪ Obsessive compulsive disorder (100)</li> <li>▪ Anxiety disorder (inkl. separation, social, generalised, and specific phobia) (45)</li> <li>▪ Depression (inkl. MDD and dysthymia) (15)</li> <li>▪ Attention-deficit / hyperactivity disorder; (22)</li> <li>▪ Oppositional defiant disorder (10)</li> <li>▪ Chronic tic disorder / Tourette disorder (12)</li> <li>▪ Autism-spectrum disorder (5)</li> </ul> | <ul style="list-style-type: none"> <li>▪ USA</li> </ul> | <ul style="list-style-type: none"> <li>▪ OCD symptoms</li> <li>▪ Overall functioning</li> <li>▪ Overall improvement in clinical condition</li> </ul> | <ul style="list-style-type: none"> <li>▪ 13 (8 – 17)</li> </ul> | <ul style="list-style-type: none"> <li>▪ 43 / 57</li> </ul> |

**Table 3:** Characteristics on included RCTs [alphabetical order] (multipage Table)

| Class of mental disorder                                 | No. Study                     | ST [n] vs. Comparator [n]                                                                                                                                                                                                                                            | N total | Diagnosed disorders in %                                                                                                                                                                    | Country | Patient relevant outcomes                                                                                         | Mean age (Range) in years | Sex f / m in % |
|----------------------------------------------------------|-------------------------------|----------------------------------------------------------------------------------------------------------------------------------------------------------------------------------------------------------------------------------------------------------------------|---------|---------------------------------------------------------------------------------------------------------------------------------------------------------------------------------------------|---------|-------------------------------------------------------------------------------------------------------------------|---------------------------|----------------|
| II: Anxiety disorders and obsessive-compulsive disorders | 4<br>▪ Siqueland 2005 (25)    | ▪ Attachment-based Family Therapy + Individual Cognitive-Behavioural Treatment (ABFT-CBT) [n = 5] vs. Individual Cognitive-Behavioural Treatment (CBT) [n = 6]                                                                                                       | ▪ 11    | ▪ Any anxiety disorder (100)<br>▪ Generalised anxiety disorder (91)<br>▪ Major depressive disorder (36)<br>▪ Social phobia (18)<br>▪ Separation anxiety disorder (9)<br>▪ Simple phobia (9) | ▪ USA   | ▪ Anxiety symptoms<br>▪ Remission of anxiety disorder (primary diagnosis)                                         | ▪ 15 (12 – 18)            | ▪ 27 / 73      |
| III: Eating disorders                                    | 5<br>▪ Le Grange 2015 (26-30) | ▪ Family-based Treatment for Adolescent Bulimia nervosa (FBT) [n = 52] vs. Cognitive-Behavioural Therapy Adapted for Adolescents (CBT) [n = 58]<br><br>▪ Study arm: Nonspecific Intervention / Supportive Psychotherapy (not relevant for this publication) [n = 20] | ▪ 130   | ▪ (partial) Bulimia nervosa (100)                                                                                                                                                           | ▪ USA   | ▪ Binge eating and compensatory behaviours<br>▪ Body weight<br>▪ Hospitalisation<br>▪ Symptoms of bulimia nervosa | ▪ 16 (12 – 18)            | ▪ 94 / 6       |

**Table 3:** Characteristics on included RCTs [alphabetical order] (multipage Table)

| Class of mental disorder   | No. Study | ST [n] vs. Comparator [n]   | N total | Diagnosed disorders in %                                                                                                           | Country     | Patient relevant outcomes                                                                                        | Mean age (Range) in years | Sex f / m in % |
|----------------------------|-----------|-----------------------------|---------|------------------------------------------------------------------------------------------------------------------------------------|-------------|------------------------------------------------------------------------------------------------------------------|---------------------------|----------------|
| III: Eating disorders      | 6         | Nyman-Carlsson 2019 (31-33) | 78      | Anorexia nervosa (100)                                                                                                             | Sweden      | Eating disorder<br>Body weight<br>Hospitalisation<br>Symptoms of anorexia nervosa                                | 19 (17 – 24)              | 100 / 0        |
| III: Eating disorders      | 7         | Schmidt 2007 (34-37)        | 85      | Bulimia nervosa (70)<br>Eating disorder not otherwise specified (30) <sup>i</sup>                                                  | UK          | Binge eating and compensatory behaviours<br>Body weight                                                          | 18 (13 – 20)              | 98 / 2         |
| IV: Hyperkinetic disorders | 8         | Boyer 2015 (38-41)          | 159     | Attention-deficit / hyperactivity disorder (100)<br>Oppositional defiant disorder (63)<br>Depression (40)<br>Anxiety disorder (50) | Netherlands | Discontinuations due to adverse events<br>Executive functioning<br>Externalising problems<br>Overall functioning | 14 (12 – 17)              | 26 / 74        |



**Table 3:** Characteristics on included RCTs [alphabetical order] (multipage Table)

| Class of mental disorder                                              | No. Study          | ST [n] vs. Comparator [n]                                                                                                                                                                                                                                                                                                             | N total | Diagnosed disorders in %                                                                                                                                                                                                                                                      | Country | Patient relevant outcomes                    | Mean age (Range) in years | Sex f / m in % |
|-----------------------------------------------------------------------|--------------------|---------------------------------------------------------------------------------------------------------------------------------------------------------------------------------------------------------------------------------------------------------------------------------------------------------------------------------------|---------|-------------------------------------------------------------------------------------------------------------------------------------------------------------------------------------------------------------------------------------------------------------------------------|---------|----------------------------------------------|---------------------------|----------------|
| V: Mental and behavioural disorders caused by psychotropic substances | 9<br>▪ CYT (42-48) | <ul style="list-style-type: none"> <li>▪ Multidimensional Family Therapy (MDFT) [n = 100] vs. Motivational Enhancement Therapy / Cognitive Behavioural Therapy [5 weeks] (MET/CBT5) [n = 102]</li> <li>▪ Multidimensional Family Therapy (MDFT) [n = 100] vs. Adolescent Community Reinforcement Approach (ACRA) [n = 100]</li> </ul> | ▪ 600   | <ul style="list-style-type: none"> <li>▪ Cannabis abuse disorder (40)</li> <li>▪ Cannabis dependence disorder (46)</li> <li>▪ Alcohol abuse disorder / alcohol dependence disorder (37)</li> <li>▪ Other drug abuse disorder / other drug dependence disorder (12)</li> </ul> | ▪ USA   | ▪ Substance use (any substance, self-report) | ▪ 16 (12 – 18)            | ▪ 18 / 82      |

**Table 3:** Characteristics on included RCTs [alphabetical order] (multipage Table)

| Class of mental disorder                                              | No. Study | ST [n] vs. Comparator [n]                                               | N total                                                                                                                                         | Diagnosed disorders in %                                | Country                                                                                                                                                                                                                                                                                                       | Patient relevant outcomes                               | Mean age (Range) in years                                                                                            | Sex f / m in %                                                   |                                                             |
|-----------------------------------------------------------------------|-----------|-------------------------------------------------------------------------|-------------------------------------------------------------------------------------------------------------------------------------------------|---------------------------------------------------------|---------------------------------------------------------------------------------------------------------------------------------------------------------------------------------------------------------------------------------------------------------------------------------------------------------------|---------------------------------------------------------|----------------------------------------------------------------------------------------------------------------------|------------------------------------------------------------------|-------------------------------------------------------------|
| V: Mental and behavioural disorders caused by psychotropic substances | 10        | <ul style="list-style-type: none"> <li>▪ Dakof 2015 (49, 50)</li> </ul> | <ul style="list-style-type: none"> <li>▪ Multidimensional Family Therapy (MDFT) [n = 55] vs. Adolescent Group Therapy (AGT) [n = 57]</li> </ul> | <ul style="list-style-type: none"> <li>▪ 112</li> </ul> | <ul style="list-style-type: none"> <li>▪ Cannabis abuse disorder (61)</li> <li>▪ Cannabis dependence disorder (30)</li> <li>▪ Alcohol abuse disorder (4)</li> <li>▪ Alcohol dependence abuse disorder (17)</li> <li>▪ Other drug abuse disorder (7)</li> <li>▪ Other drug dependence disorder (17)</li> </ul> | <ul style="list-style-type: none"> <li>▪ USA</li> </ul> | <ul style="list-style-type: none"> <li>▪ Substance use problem severity</li> <li>▪ Externalising problems</li> </ul> | <ul style="list-style-type: none"> <li>▪ 16 (13 – 18)</li> </ul> | <ul style="list-style-type: none"> <li>▪ 11 / 89</li> </ul> |

**Table 3:** Characteristics on included RCTs [alphabetical order] (multipage Table)

| Class of mental disorder                                              | No. Study | ST [n] vs. Comparator [n]                                          | N total                                                                                                                                     | Diagnosed disorders in %                                | Country                                                                                                                                                                                                                                                                           | Patient relevant outcomes                                                                              | Mean age (Range) in years                                                                                                                                                                                                                                                                                                                                                                                      | Sex f / m in %                                                   |                                                             |
|-----------------------------------------------------------------------|-----------|--------------------------------------------------------------------|---------------------------------------------------------------------------------------------------------------------------------------------|---------------------------------------------------------|-----------------------------------------------------------------------------------------------------------------------------------------------------------------------------------------------------------------------------------------------------------------------------------|--------------------------------------------------------------------------------------------------------|----------------------------------------------------------------------------------------------------------------------------------------------------------------------------------------------------------------------------------------------------------------------------------------------------------------------------------------------------------------------------------------------------------------|------------------------------------------------------------------|-------------------------------------------------------------|
| V: Mental and behavioural disorders caused by psychotropic substances | 11        | <ul style="list-style-type: none"> <li>▪ INCANT (51-73)</li> </ul> | <ul style="list-style-type: none"> <li>▪ Multidimensional Family Therapy (MDFT) [n = 212] vs. Treatment as Usual (TAU) [n = 238]</li> </ul> | <ul style="list-style-type: none"> <li>▪ 450</li> </ul> | <ul style="list-style-type: none"> <li>▪ Cannabis abuse disorder (16)</li> <li>▪ Cannabis dependence disorder (84)</li> <li>▪ Alcohol abuse disorder / alcohol dependence disorder (40)</li> <li>▪ Other drug abuse disorder / other drug dependence disorder (&lt; 5)</li> </ul> | <ul style="list-style-type: none"> <li>▪ Belgium, France, Germany, Netherlands, Switzerland</li> </ul> | <ul style="list-style-type: none"> <li>▪ Cannabis use disorder</li> <li>▪ Symptoms of cannabis use disorder</li> <li>▪ Substance use detected by laboratory tests</li> <li>▪ Substance use problem severity</li> <li>▪ Use of cannabis</li> <li>▪ Use of substances for which criteria for a substance use disorder are not met</li> <li>▪ Externalising problems</li> <li>▪ Internalising problems</li> </ul> | <ul style="list-style-type: none"> <li>▪ 16 (13 – 18)</li> </ul> | <ul style="list-style-type: none"> <li>▪ 15 / 85</li> </ul> |

**Table 3:** Characteristics on included RCTs [alphabetical order] (multipage Table)

| <b>Class of mental disorder</b>                                       | <b>No. Study</b> | <b>ST [n] vs. Comparator [n]</b> | <b>N total</b> | <b>Diagnosed disorders in %</b>                                                                                                                                                                                                                                                                                                                                                                                       | <b>Country</b> | <b>Patient relevant outcomes</b>                                                                                                                                                                       | <b>Mean age (Range) in years</b> | <b>Sex f / m in %</b> |
|-----------------------------------------------------------------------|------------------|----------------------------------|----------------|-----------------------------------------------------------------------------------------------------------------------------------------------------------------------------------------------------------------------------------------------------------------------------------------------------------------------------------------------------------------------------------------------------------------------|----------------|--------------------------------------------------------------------------------------------------------------------------------------------------------------------------------------------------------|----------------------------------|-----------------------|
| V: Mental and behavioural disorders caused by psychotropic substances | 12               | ▪ Liddle 2008 (74-81)            | ▪ 224          | <ul style="list-style-type: none"> <li>▪ Multidimensional Family Therapy (MDFT) [n = 112] vs. Cognitive Behavioural Therapy (CBT) [n = 112]</li> <li>▪ Cannabis abuse disorder (13)</li> <li>▪ Cannabis dependence disorder (75)</li> <li>▪ Alcohol abuse disorder (4)</li> <li>▪ Alcohol dependence disorder (20)</li> <li>▪ Other drug abuse disorder (2)</li> <li>▪ Other drug dependence disorder (15)</li> </ul> | ▪ USA          | <ul style="list-style-type: none"> <li>▪ Substance use problem severity</li> <li>▪ Use of cannabis</li> <li>▪ Use of substances for which criteria for a substance use disorder are not met</li> </ul> | ▪ 15 (12 – 18)                   | ▪ 19 / 81             |
| V: Mental and behavioural disorders caused by psychotropic substances | 13               | ▪ Liddle 2018 (82, 83)           | ▪ 113          | <ul style="list-style-type: none"> <li>▪ Multidimensional Family Therapy (MDFT) [n = 57] vs. Residential Treatment (RT) [n = 56]</li> <li>▪ Cannabis use disorder (100)</li> <li>▪ Alcohol use disorder (71)</li> <li>▪ Opioid use disorder (33)</li> </ul>                                                                                                                                                           | ▪ USA          | <ul style="list-style-type: none"> <li>▪ Substance use problem severity</li> <li>▪ Externalising problems</li> <li>▪ Internalising problems</li> </ul>                                                 | ▪ 15 (13 – 18)                   | ▪ 25 / 75             |

**Table 3:** Characteristics on included RCTs [alphabetical order] (multipage Table)

| Class of mental disorder                                              | No. Study | ST [n] vs. Comparator [n] | N total                                                                                                 | Diagnosed disorders in % | Country         | Patient relevant outcomes | Mean age (Range) in years                                                                                                               | Sex f / m in %                  |
|-----------------------------------------------------------------------|-----------|---------------------------|---------------------------------------------------------------------------------------------------------|--------------------------|-----------------|---------------------------|-----------------------------------------------------------------------------------------------------------------------------------------|---------------------------------|
| V: Mental and behavioural disorders caused by psychotropic substances | 14        | ▪ Slesnick 2013 (84-88)   | ▪ Ecologically-Based Family Therapy (EBFT) [n = 61] vs. Community Reinforcement Approach (CRA) [n = 57] | ▪ 179                    | ▪ Not specified | ▪ USA                     | ▪ Use of substances for which criteria for a substance use disorder are not met<br>▪ Externalising problems<br>▪ Internalising problems | ▪ 15 (12 – 17)<br>▪ 52,5 / 47,5 |
| V: Mental and behavioural disorders caused by psychotropic substances | 15        | ▪ Waldron 2001 (89, 90)   | ▪ Functional Family Therapy (FFT) [n = 30] vs. Individual Cognitive-Behavioural Therapy (CBT) [n = 31]  | ▪ 120                    | ▪ Not specified | ▪ USA                     | ▪ Substance use detected by laboratory tests<br>▪ Use of cannabis<br>▪ Externalising problems<br>▪ Internalising problems               | ▪ 16 (13 – 17)<br>▪ 20 / 80     |

ABFT: Attachment-based Family Therapy; ACRA: Adolescent Community Reinforcement Approach; AGT: Adolescent Group Therapy; CBT: Cognitive Behaviour / Behavioural Therapy; CRA: Community Reinforcement Approach; DSM: Diagnostic and Statistical Manual of Mental Disorders; EBFT: Ecologically-Based Family Therapy; f: female; FBT: Family-based Treatment for Adolescent Bulimia nervosa; FFT: Functional Family Therapy; FT: Family / Individual Therapy; m: male; MDFT: Multidimensional Family Therapy; MET: Motivational Enhancement; N: number of randomized (or included) patients; OCD: Obsessive-compulsive disorder; PFIT: Positive Family Interaction Therapy; PML: Plan My Life; RCT: Randomized controlled Trial; RT: Residential Treatment; SBFT: Systemic Behaviour Family Therapy; SFT: Solution-focused Treatment / Therapy; SPACE: Supportive Parenting for Anxious Childhood Emotions; TAU: Treatment as Usual; vs.: versus, YA: Young Adults

**A5 Additional file 5 – Risk of bias assessment****Table 4:** Risk of bias assessment – study level

| No. | Study                       | Generation of randomization sequence | Allocation concealment | Blinding |                | Result-independent reporting | Lack of other aspects | Risk of bias study level |
|-----|-----------------------------|--------------------------------------|------------------------|----------|----------------|------------------------------|-----------------------|--------------------------|
|     |                             |                                      |                        | Patient  | Treating staff |                              |                       |                          |
| 1   | Brent 1997 (6-19)           | ✓                                    | ?                      | -        | -              | -                            | -                     | High                     |
| 2   | Lebowitz 2020 (20)          | ✓                                    | ?                      | -        | -              | -                            | -                     | High                     |
| 3   | Peris 2013 (21-24)          | ✓                                    | ?                      | -        | -              | -                            | -                     | High                     |
| 4   | Siqueland 2005 (25)         | ?                                    | ?                      | -        | -              | -                            | -                     | High                     |
| 5   | Le Grange 2015 (26-30)      | ?                                    | ?                      | -        | -              | -                            | -                     | High                     |
| 6   | Nyman-Carlsson 2019 (31-33) | ✓                                    | ?                      | -        | -              | -                            | -                     | High                     |
| 7   | Schmidt 2007 (34-37)        | ✓                                    | ✓                      | X        | X              | ?                            | ✓                     | Low                      |
| 8   | Boyer 2015 (38-41)          | ✓                                    | ✓                      | X        | X              | ?                            | ✓                     | Low                      |
| 9   | CYT (42-48)                 | ✓                                    | ?                      | -        | -              | -                            | -                     | High                     |
| 10  | Dakof 2015 (49, 50)         | ✓                                    | ?                      | -        | -              | -                            | -                     | High                     |
| 11  | INCANT (51-73)              | ✓                                    | ✓                      | X        | X              | ✓                            | ✓                     | Low                      |
| 12  | Liddle 2008 (74-81)         | ✓                                    | ?                      | -        | -              | -                            | -                     | High                     |
| 13  | Liddle 2018 (82, 83)        | ✓                                    | ?                      | -        | -              | -                            | -                     | High                     |
| 14  | Slesnick 2013 (84-88)       | ✓                                    | ?                      | -        | -              | -                            | -                     | High                     |
| 15  | Waldron 2001 (89, 90)       | ?                                    | ?                      | -        | -              | -                            | -                     | High                     |

-not rated; ✓ yes; X no; ? unclear

If the evaluation of the criteria "adequate generation of the randomization sequence" and / or "concealment of group assignment" revealed a high bias on study level, the risk of bias for all outcomes was rated as high and an evaluation of the remaining criteria was omitted. When an outcome was reported subjectively, there was automatically a high bias on outcome level. Only in case of a low risk of bias at study level, an outcome-specific assessment was performed (**Table 5**). A high risk of bias at the outcome level leads to moderate qualitative certainty of the results, a low risk of bias corresponds to a moderate risk of bias.

**Table 5:** Risk of bias assessment – outcome level

| No. | Outcome                                                                       | Study                | Blinding outcome investigator | ITT principle adequately implemented | Result-independent reporting | Lack of other aspects | Risk of bias outcome level | Qualitative certainty of results |
|-----|-------------------------------------------------------------------------------|----------------------|-------------------------------|--------------------------------------|------------------------------|-----------------------|----------------------------|----------------------------------|
| 12  | Binge eating and compensatory behaviours                                      | Schmidt 2007 (34-37) | X                             | -                                    | -                            | -                     | High                       | Moderate                         |
| 13  | Body weight                                                                   | Schmidt 2007 (34-37) | ✓                             | X                                    | ✓                            | ✓                     | High                       | Moderate                         |
| 18  | Discontinuations due to adverse events                                        | Boyer 2015 (38-41)   | X                             | -                                    | -                            | -                     | High                       | Moderate                         |
| 19  | Executive functioning                                                         | Boyer 2015 (38-41)   | X                             | -                                    | -                            | -                     | High                       | Moderate                         |
| 20  | Externalising problems                                                        | Boyer 2015 (38-41)   | X                             | -                                    | -                            | -                     | High                       | Moderate                         |
| 21  | Overall functioning                                                           | Boyer 2015 (38-41)   | X                             | -                                    | -                            | -                     | High                       | Moderate                         |
| 22  | Cannabis use disorder                                                         | INCANT (51-73)       | X                             | -                                    | -                            | -                     | High                       | Moderate                         |
| 23  | Externalising problems                                                        | INCANT (51-73)       | X                             | -                                    | -                            | -                     | High                       | Moderate                         |
| 24  | Internalising problems                                                        | INCANT (51-73)       | X                             | -                                    | -                            | -                     | High                       | Moderate                         |
| 25  | Symptoms of cannabis use disorder                                             | INCANT (51-73)       | X                             | -                                    | -                            | -                     | High                       | Moderate                         |
| 27  | Substance use detected by laboratory tests                                    | INCANT (51-73)       | ✓                             | ✓                                    | ✓                            | ✓                     | Low                        | High                             |
| 28  | Substance use problem severity                                                | INCANT (51-73)       | X                             | -                                    | -                            | -                     | High                       | Moderate                         |
| 29  | Use of cannabis                                                               | INCANT (51-73)       | X                             | -                                    | -                            | -                     | High                       | Moderate                         |
| 30  | Use of substances for which criteria for a substance use disorder are not met | INCANT (51-73)       | X                             | -                                    | -                            | -                     | High                       | Moderate                         |

- not rated; ✓ yes, X no

ITT: Intention to treat

## A6 Additional file 6 – All results

### A6.1 Tabular view – Class of mental disorders I: Affective disorders

**Table 6:** Affective disorders – results for all patient-relevant outcomes with assessable data (multipage Table)

| No.               | Outcome                                                                                                                                                              | N   | N   | Effect    | Effect             | [95 %-CI]                  | p-value                     | Direction of effect | Study             | Conclusion on benefit at outcome level | Conclusion on benefit across outcomes |
|-------------------|----------------------------------------------------------------------------------------------------------------------------------------------------------------------|-----|-----|-----------|--------------------|----------------------------|-----------------------------|---------------------|-------------------|----------------------------------------|---------------------------------------|
|                   | Operationalisation                                                                                                                                                   | ST  | COM | measure   | estimate           |                            |                             |                     |                   |                                        |                                       |
|                   | Length of follow-up                                                                                                                                                  |     |     |           |                    |                            |                             |                     |                   |                                        |                                       |
| <b>ST vs. COM</b> |                                                                                                                                                                      |     |     |           |                    |                            |                             |                     |                   |                                        | ↘ <sup>a</sup>                        |
| <b>1</b>          | <b>Depressive symptoms</b>                                                                                                                                           |     |     |           |                    |                            |                             |                     |                   |                                        | ↘                                     |
|                   | <b>BDI</b>                                                                                                                                                           |     |     |           |                    |                            |                             |                     |                   |                                        |                                       |
|                   | Week 12 – 16                                                                                                                                                         | 29  | 35  | Hedges' g | 0.38 <sup>b</sup>  | [-0.12; 0.88] <sup>b</sup> | 0.130 <sup>b, c</sup>       | ▼                   | Brent 1997 (6-19) |                                        |                                       |
|                   | Month 26.8– 27.7                                                                                                                                                     | n/a | n/a | Hedges' g | n/a                | n/a                        | > 0.05 <sup>d</sup>         | ?                   | Brent 1997 (6-19) |                                        |                                       |
|                   | <b>BDI &lt; 9 (Proportion of patients who fell below a cut-off of 9 on the BDI on at least 3 consecutive therapy sessions (sustained until the end of therapy.))</b> |     |     |           |                    |                            |                             |                     |                   |                                        |                                       |
|                   | Week 12 – 16                                                                                                                                                         | 29  | 35  | OR        | 0.35 <sup>b</sup>  | [0.13; 0.97] <sup>b</sup>  | <b>0.045<sup>b, e</sup></b> | ▼                   | Brent 1997 (6-19) |                                        |                                       |
| <b>2</b>          | <b>Major depression</b>                                                                                                                                              |     |     |           |                    |                            |                             |                     |                   |                                        | ↔                                     |
|                   | Diagnosis of major depressive disorder (responder analysis) (Kiddie-SADS)                                                                                            |     |     |           |                    |                            |                             |                     |                   |                                        |                                       |
|                   | Week 12 – 16                                                                                                                                                         | 31  | 35  | OR        | 2.30 <sup>b</sup>  | [0.72; 7.32] <sup>b</sup>  | 0.173 <sup>b, e</sup>       | ▼                   | Brent 1997 (6-19) |                                        |                                       |
| <b>3</b>          | <b>Overall functioning</b>                                                                                                                                           |     |     |           |                    |                            |                             |                     |                   |                                        | ↔                                     |
|                   | <b>CGAS</b>                                                                                                                                                          |     |     |           |                    |                            |                             |                     |                   |                                        |                                       |
|                   | Week 12 – 16                                                                                                                                                         | 31  | 35  | Hedges' g | -0.20 <sup>b</sup> | [-0.69; 0.28] <sup>b</sup> | 0.408 <sup>b, c</sup>       | ▼                   | Brent 1997 (6-19) |                                        |                                       |
|                   | Month 26.8 – 27.7                                                                                                                                                    | n/a | n/a | Hedges' g | n/a                | n/a                        | > 0.05 <sup>d</sup>         | ?                   | Brent 1997 (6-19) |                                        |                                       |
|                   | <b>CGAS &lt; 60</b>                                                                                                                                                  |     |     |           |                    |                            |                             |                     |                   |                                        |                                       |
|                   | Week 12 – 16                                                                                                                                                         | 31  | 35  | OR        | 1.59 <sup>b</sup>  | [0.55; 4.57] <sup>b</sup>  | 0.530 <sup>b, e</sup>       | ▲                   | Brent 1997 (6-19) |                                        |                                       |
|                   | Month 26.8– 27.7                                                                                                                                                     | n/a | n/a | OR        | n/a                | n/a                        | > 0.05 <sup>d</sup>         | ?                   | Brent 1997 (6-19) |                                        |                                       |



**Table 6:** Affective disorders – results for all patient-relevant outcomes with assessable data (multipage Table)

| No.      | Outcome                                                                                                                                                                                                                                             | N  | N   | Effect  | Effect            | [95 %-CI]                 | p-value              | Direction of effect | Study             | Conclusion on benefit at outcome level | Conclusion on benefit across outcomes |
|----------|-----------------------------------------------------------------------------------------------------------------------------------------------------------------------------------------------------------------------------------------------------|----|-----|---------|-------------------|---------------------------|----------------------|---------------------|-------------------|----------------------------------------|---------------------------------------|
|          | Operationalisation                                                                                                                                                                                                                                  | ST | COM | measure | estimate          |                           |                      |                     |                   |                                        |                                       |
|          | Length of follow-up                                                                                                                                                                                                                                 |    |     |         |                   |                           |                      |                     |                   |                                        |                                       |
| <b>4</b> | <b>Suicidal ideation</b>                                                                                                                                                                                                                            |    |     |         |                   |                           |                      |                     |                   | ↔                                      |                                       |
|          | <b>Proportion of patients with currently existing suicidal ideation that was associated with a planned suicide or suicide attempt. K-SADS-P/E &gt; 4 (unclear, K-SADS-P/E &gt; 4 or K-SADS-P/E ≥ 4, criterion specified from Brent 1997 (6-19))</b> |    |     |         |                   |                           |                      |                     |                   |                                        |                                       |
|          | Week 12 – 16                                                                                                                                                                                                                                        | 31 | 35  | OR      | 0.74 <sup>b</sup> | [0.11; 4.72] <sup>b</sup> | 0.775 <sup>b,e</sup> | ▲                   | Brent 1997 (6-19) |                                        |                                       |

a. Hint of a lesser benefit of ST compared to CBT across all outcomes based on the statistically significant effect to the disadvantage of ST for depressive symptoms (BDI < 9) along with the fact that the point estimates for other outcomes indicated a lower benefit of ST.

b. own calculation

c. t-Test

d. comparison of all 3 study arms

e. CSZ-Test (91)

↘: hint of less benefit of ST, one study

↔: no proof or indication or hint of a greater benefit or harm, one study

▲: effect in favour of ST

▼: effect to the disadvantage of ST

? Direction of effect is unclear.

significant in **bold** (p < 0.05)

BDI: Beck Depression Inventory; CBT: Cognitive Behaviour Therapy; CI: Confidence interval; CGAS: Children’s Global Assessment Scale; COM: Comparator; K-SADS-P/E: Schedule for Affective Disorders and Schizophrenia for School-age Children, Present Episode and Epidemiologic versions; N: Number of analysed patients; n/a: not available or not specified in the study; OR: Odds Ratio; ST: Systemic Therapy; vs.: versus

**A6.2 Tabular view – Class of mental disorders II: Anxiety disorders**

**Table 7:** Anxiety disorders – results for all patient-relevant outcomes with assessable data (comparison 1: ST versus CBT) (multipage Table)

| No.      | Outcome<br>Operationalisation<br>Length of follow-up                                                                                                                                                                                                                                                                                                                                            | N<br>ST | N<br>COM | Effect<br>measure | Effect<br>estimate | [95 %-CI]                  | p-value              | Direction<br>of effect | Study              | Conclusion<br>on benefit<br>at<br>outcome<br>level | Conclusion<br>on benefit<br>across<br>outcomes |
|----------|-------------------------------------------------------------------------------------------------------------------------------------------------------------------------------------------------------------------------------------------------------------------------------------------------------------------------------------------------------------------------------------------------|---------|----------|-------------------|--------------------|----------------------------|----------------------|------------------------|--------------------|----------------------------------------------------|------------------------------------------------|
|          | <b>ST vs. COM</b>                                                                                                                                                                                                                                                                                                                                                                               |         |          |                   |                    |                            |                      |                        |                    |                                                    | ↔ <sup>a</sup>                                 |
| <b>5</b> | <b>Anxiety symptoms</b>                                                                                                                                                                                                                                                                                                                                                                         |         |          |                   |                    |                            |                      |                        |                    | ↔                                                  |                                                |
|          | <b>PARS</b>                                                                                                                                                                                                                                                                                                                                                                                     |         |          |                   |                    |                            |                      |                        |                    |                                                    |                                                |
|          | Week 12                                                                                                                                                                                                                                                                                                                                                                                         | 49      | 48       | MD                | -1.10 <sup>b</sup> | [-2.82; 0.62] <sup>b</sup> | 0.207 <sup>b,c</sup> | ▲                      | Lebowitz 2020 (20) |                                                    |                                                |
|          | <b>SCARED child report</b>                                                                                                                                                                                                                                                                                                                                                                      |         |          |                   |                    |                            |                      |                        |                    |                                                    |                                                |
|          | Week 12                                                                                                                                                                                                                                                                                                                                                                                         | 49      | 48       | MD                | 2.49 <sup>b</sup>  | [-3.14; 8.12] <sup>b</sup> | 0.382 <sup>b,c</sup> | ▼                      | Lebowitz 2020 (20) |                                                    |                                                |
| <b>6</b> | <b>Overall improvement in clinical condition</b>                                                                                                                                                                                                                                                                                                                                                |         |          |                   |                    |                            |                      |                        |                    | ↔                                                  |                                                |
|          | <b>CGI-I (Summary assessment of change between baseline and follow-up in terms of psychiatric symptomatology (frequency and intensity), experience of distress, and functional impairment in everyday life (work, school, relationships); clinician-assessed change in illness severity in relation to the specified dimensions between baseline survey and follow-up survey was recorded.)</b> |         |          |                   |                    |                            |                      |                        |                    |                                                    |                                                |
|          | Week 12                                                                                                                                                                                                                                                                                                                                                                                         | 49      | 48       | Hedges' g         | -0.06 <sup>b</sup> | [-0.46; 0.34] <sup>b</sup> | 0.769 <sup>b,c</sup> | ▲                      | Lebowitz 2020 (20) |                                                    |                                                |
|          | <b>CGI-I ≤ 2</b>                                                                                                                                                                                                                                                                                                                                                                                |         |          |                   |                    |                            |                      |                        |                    |                                                    |                                                |
|          | Week 12                                                                                                                                                                                                                                                                                                                                                                                         | 48      | 49       | OR                | 2.27 <sup>b</sup>  | [0.77; 6.65] <sup>b</sup>  | 0.7 <sup>b,d</sup>   | ▲                      | Lebowitz 2020 (20) |                                                    |                                                |
| <b>7</b> | <b>Overall severity of clinical condition</b>                                                                                                                                                                                                                                                                                                                                                   |         |          |                   |                    |                            |                      |                        |                    | ↔                                                  |                                                |
|          | <b>CGI-S (Summary assessment of psychiatric symptoms (frequency and intensity), stress experience, and functional impairment in everyday life (work, school, relationships); average severity over the past 7 days was recorded.)</b>                                                                                                                                                           |         |          |                   |                    |                            |                      |                        |                    |                                                    |                                                |
|          | Week 12                                                                                                                                                                                                                                                                                                                                                                                         | 49      | 48       | Hedges' g         | -0.15 <sup>b</sup> | [-0.55; 0.25] <sup>b</sup> | 0.464 <sup>b,c</sup> | ▲                      | Lebowitz 2020 (20) |                                                    |                                                |
|          | <b>CGI-I ≤ 2</b>                                                                                                                                                                                                                                                                                                                                                                                |         |          |                   |                    |                            |                      |                        |                    |                                                    |                                                |
|          | Week 12                                                                                                                                                                                                                                                                                                                                                                                         | 48      | 49       | OR                | 0.97 <sup>b</sup>  | [0.43; 2.17] <sup>b</sup>  | 0.88 <sup>b,d</sup>  | ▼                      | Lebowitz 2020 (20) |                                                    |                                                |

**Table 7:** Anxiety disorders – results for all patient-relevant outcomes with assessable data (comparison 1: ST versus CBT) (multipage Table)

| No.      | Outcome<br>Operationalisation<br>Length of follow-up                                                                                                                                                                     | N<br>ST | N<br>COM | Effect<br>measure | Effect<br>estimate | [95 %-CI] | p-value           | Direction<br>of effect | Study              | Conclusion<br>on benefit<br>at<br>outcome<br>level | Conclusion<br>on benefit<br>across<br>outcomes |
|----------|--------------------------------------------------------------------------------------------------------------------------------------------------------------------------------------------------------------------------|---------|----------|-------------------|--------------------|-----------|-------------------|------------------------|--------------------|----------------------------------------------------|------------------------------------------------|
| <b>8</b> | <b>Remission of anxiety disorder</b><br><b>ADIS-c/pa (Number of patients who no longer met the required diagnostic criteria according to DSM-IV for any anxiety disorder; diagnosis by means of ADIS-c/p)</b><br>Week 12 | n/a     | n/a      | n/a               | n/a                | n/a       | 0.57 <sup>e</sup> | ▲                      | Lebowitz 2020 (20) | ↔                                                  |                                                |

a. No proof or indication or hint of a greater benefit or harm of ST across all outcomes based on effects which were statistically not significant.

b. own calculation

c. t-Test

d. Chi-square test

↔: no proof or indication or hint of a greater benefit or harm, one study

▲: effect in favour of ST

▼: effect to the disadvantage of ST

significant in **bold** (p < 0.05)

ADIS-c/p: Anxiety Disorders Interview Schedule for DSM-IV, child and parent version; CGI-I: Clinical Global Impressions – Improvement; CGI-S: Clinical Global Impressions – Severity; CI: Confidence interval; COM: Comparator; DSM: Diagnostic and Statistical Manual of Mental Disorders; MD: Mean difference; N: Number of analysed patients; n/a: not available or not specified in the study; OR: Odds Ratio; PARS: Pediatric Anxiety Rating Scale; SCARED: Screen for Childhood Anxiety Related Emotional Disorders; ST: Systemic Therapy; vs.: versus

**A6.3 Tabular view – Class of mental disorders II: Anxiety disorders and obsessive-compulsive disorders**

**Table 8:** Anxiety disorders and obsessive-compulsive disorders – results for all patient-relevant outcomes with assessable data (comparison 2: ST as an add-on to CBT versus CBT alone) (multipage Table)

| No.               | Outcome<br>Operationalisation<br>Length of follow-up                                                                                                                                                                                                                                                                                                                                            | N<br>ST | N<br>COM | Effect<br>measure | Effect<br>estimate | [95 %-CI]                    | p-value                      | Direction<br>of effect | Study               | Conclusion<br>on benefit<br>at<br>outcome<br>level | Conclusion<br>on benefit<br>across<br>outcomes |
|-------------------|-------------------------------------------------------------------------------------------------------------------------------------------------------------------------------------------------------------------------------------------------------------------------------------------------------------------------------------------------------------------------------------------------|---------|----------|-------------------|--------------------|------------------------------|------------------------------|------------------------|---------------------|----------------------------------------------------|------------------------------------------------|
| <b>ST vs. COM</b> |                                                                                                                                                                                                                                                                                                                                                                                                 |         |          |                   |                    |                              |                              |                        |                     |                                                    | ↗ <sup>a</sup>                                 |
| 5                 | <b>Anxiety symptoms</b>                                                                                                                                                                                                                                                                                                                                                                         |         |          |                   |                    |                              |                              |                        |                     | ↔                                                  |                                                |
|                   | <b>BAI</b>                                                                                                                                                                                                                                                                                                                                                                                      |         |          |                   |                    |                              |                              |                        |                     |                                                    |                                                |
|                   | Month 3.7                                                                                                                                                                                                                                                                                                                                                                                       | 5       | 6        | MD                | -1.70 <sup>b</sup> | [-13.47; 10.07] <sup>b</sup> | 0.751 <sup>b</sup>           | ▲                      | Siqueland 2005 (25) |                                                    |                                                |
|                   | Month 10 – 13                                                                                                                                                                                                                                                                                                                                                                                   | 5       | 6        | MD                | 1.80 <sup>b</sup>  | [-4.28; 7.88] <sup>b</sup>   | 0.520 <sup>b</sup>           | ▼                      | Siqueland 2005 (25) |                                                    |                                                |
|                   | <b>HAM-A</b>                                                                                                                                                                                                                                                                                                                                                                                    |         |          |                   |                    |                              |                              |                        |                     |                                                    |                                                |
|                   | Month 3.7                                                                                                                                                                                                                                                                                                                                                                                       | 5       | 6        | MD                | -2.90 <sup>b</sup> | [-10.41; 4.61] <sup>b</sup>  | 0.405 <sup>b</sup>           | ▲                      | Siqueland 2005 (25) |                                                    |                                                |
|                   | Month 10 – 13                                                                                                                                                                                                                                                                                                                                                                                   | 5       | 6        | MD                | -0.40 <sup>b</sup> | [-7.22; 6.42] <sup>b</sup>   | 0.897 <sup>b</sup>           | ▲                      | Siqueland 2005 (25) |                                                    |                                                |
| 6                 | <b>Overall improvement in clinical condition</b>                                                                                                                                                                                                                                                                                                                                                |         |          |                   |                    |                              |                              |                        |                     | ↗                                                  |                                                |
|                   | <b>CGI-I (Summary assessment of change between baseline and follow-up in terms of psychiatric symptomatology (frequency and intensity), experience of distress, and functional impairment in everyday life (work, school, relationships); clinician-assessed change in illness severity in relation to the specified dimensions between baseline survey and follow-up survey was recorded.)</b> |         |          |                   |                    |                              |                              |                        |                     |                                                    |                                                |
|                   | Week 14                                                                                                                                                                                                                                                                                                                                                                                         | 31      | 30       | Hedges' g         | -0.64 <sup>b</sup> | [-1.15; -0.12] <sup>b</sup>  | <b>0.015</b> <sup>b, c</sup> | ▲                      | Peris 2013 (21-24)  |                                                    |                                                |
|                   | <b>CGI-I ≤ 2</b>                                                                                                                                                                                                                                                                                                                                                                                |         |          |                   |                    |                              |                              |                        |                     |                                                    |                                                |
|                   | Week 14                                                                                                                                                                                                                                                                                                                                                                                         | 31      | 30       | OR                | 3.15 <sup>b</sup>  | [1.10; 8.99] <sup>b</sup>    | <b>0.03</b> <sup>b, d</sup>  | ▲                      | Peris 2013 (21-24)  |                                                    |                                                |
| 9                 | <b>Obsessive-compulsive disorder (OCD) symptoms</b>                                                                                                                                                                                                                                                                                                                                             |         |          |                   |                    |                              |                              |                        |                     | ↗                                                  |                                                |
|                   | <b>CY-BOCS</b>                                                                                                                                                                                                                                                                                                                                                                                  |         |          |                   |                    |                              |                              |                        |                     |                                                    |                                                |
|                   | Week 14                                                                                                                                                                                                                                                                                                                                                                                         | 31      | 30       | Hedges' g         | -0.54 <sup>b</sup> | [-1.05; -0.02] <sup>b</sup>  | <b>0.038</b> <sup>e</sup>    | ▲                      | Peris 2013 (21-24)  |                                                    |                                                |
|                   | <b>CY-BOCS ≤ 14 (Proportion of patients who fell below a cut-off of 15 on the CY-BOCS.)</b>                                                                                                                                                                                                                                                                                                     |         |          |                   |                    |                              |                              |                        |                     |                                                    |                                                |
|                   | Week 14                                                                                                                                                                                                                                                                                                                                                                                         | 31      | 30       | OR                | 3.81 <sup>b</sup>  | [1.29; 11.20] <sup>b</sup>   | <b>0.01</b> <sup>d</sup>     | ▲                      | Peris 2013 (21-24)  |                                                    |                                                |

**Table 8:** Anxiety disorders and obsessive-compulsive disorders – results for all patient-relevant outcomes with assessable data (comparison 2: ST as an add-on to CBT versus CBT alone) (multipage Table)

| No.       | Outcome                                                                                                                                                                                                                                              | N               | N               | Effect    | Effect             | [95 %-CI]                   | p-value                      | Direction<br>of effect | Study               | Conclusion<br>on benefit<br>at<br>outcome<br>level | Conclusion<br>on benefit<br>across<br>outcomes |
|-----------|------------------------------------------------------------------------------------------------------------------------------------------------------------------------------------------------------------------------------------------------------|-----------------|-----------------|-----------|--------------------|-----------------------------|------------------------------|------------------------|---------------------|----------------------------------------------------|------------------------------------------------|
|           | Operationalisation                                                                                                                                                                                                                                   | ST              | COM             | measure   | estimate           |                             |                              |                        |                     |                                                    |                                                |
|           | Length of follow-up                                                                                                                                                                                                                                  |                 |                 |           |                    |                             |                              |                        |                     |                                                    |                                                |
| <b>10</b> | <b>Overall functioning</b>                                                                                                                                                                                                                           |                 |                 |           |                    |                             |                              |                        |                     |                                                    | ↗                                              |
|           | <b>Overall functioning (not disease-specific)</b>                                                                                                                                                                                                    |                 |                 |           |                    |                             |                              |                        |                     |                                                    |                                                |
|           | <b>CGAS</b>                                                                                                                                                                                                                                          |                 |                 |           |                    |                             |                              |                        |                     |                                                    |                                                |
|           | Week 14                                                                                                                                                                                                                                              | 10 <sup>f</sup> | 10 <sup>f</sup> | Hedges' g | 0.56 <sup>b</sup>  | [-0.34; 1.46] <sup>b</sup>  | 0.207 <sup>b, c</sup>        | ▲                      | Peris 2013 (21-24)  |                                                    |                                                |
|           | <b>Overall functioning (specific for obsessive-compulsive disorder)</b>                                                                                                                                                                              |                 |                 |           |                    |                             |                              |                        |                     |                                                    |                                                |
|           | <b>COIS-R</b>                                                                                                                                                                                                                                        |                 |                 |           |                    |                             |                              |                        |                     |                                                    |                                                |
|           | Week 14                                                                                                                                                                                                                                              | 31              | 30              | Hedges' g | -0.75 <sup>b</sup> | [-1.27; -0.23] <sup>b</sup> | <b>0.004</b> <sup>b, e</sup> | ▲                      | Peris 2013 (21-24)  |                                                    |                                                |
| <b>11</b> | <b>Remission of anxiety disorder (primary diagnosis)</b>                                                                                                                                                                                             |                 |                 |           |                    |                             |                              |                        |                     |                                                    | ↔                                              |
|           | <b>ADIS-Child (Number of patients who no longer met all diagnostic criteria for the primary anxiety disorder in each case; most patients met criteria for generalised anxiety disorder according to DSM-IV at baseline; diagnosis by ADIS-Child)</b> |                 |                 |           |                    |                             |                              |                        |                     |                                                    |                                                |
|           | Month 3.7                                                                                                                                                                                                                                            | 5               | 6               | OR        | 0.33 <sup>b</sup>  | [0.03; 1.26] <sup>b</sup>   | 0.522 <sup>b</sup>           | ▼                      | Siqueland 2005 (25) |                                                    |                                                |
|           | Month 10 – 13                                                                                                                                                                                                                                        | 5               | 6               | OR        | 0.23 <sup>b</sup>  | [0.01; 7.05] <sup>b</sup>   | 0.325 <sup>b</sup>           | ▼                      | Siqueland 2005 (25) |                                                    |                                                |

**Table 8:** Anxiety disorders and obsessive-compulsive disorders – results for all patient-relevant outcomes with assessable data (comparison 2: ST as an add-on to CBT versus CBT alone) (multipage Table)

| No.                                                                                                                                                                                                                                                                                                                                                                                                                                                                                                                                                                                  | Outcome<br>Operationalisation<br>Length of follow-up                                                                                                                                                                                                                                                                                 | N<br>ST | N<br>COM | Effect<br>measure | Effect<br>estimate | [95 %-CI] | p-value | Direction<br>of effect | Study | Conclusion<br>on benefit<br>at<br>outcome<br>level | Conclusion<br>on benefit<br>across<br>outcomes |  |
|--------------------------------------------------------------------------------------------------------------------------------------------------------------------------------------------------------------------------------------------------------------------------------------------------------------------------------------------------------------------------------------------------------------------------------------------------------------------------------------------------------------------------------------------------------------------------------------|--------------------------------------------------------------------------------------------------------------------------------------------------------------------------------------------------------------------------------------------------------------------------------------------------------------------------------------|---------|----------|-------------------|--------------------|-----------|---------|------------------------|-------|----------------------------------------------------|------------------------------------------------|--|
| a.                                                                                                                                                                                                                                                                                                                                                                                                                                                                                                                                                                                   | Hint of greater benefit of ST as an add-on to CBT compared with CBT alone across all outcomes based on the statistically significant effects in favour of ST as an add-on to CBT for obsessive-compulsive disorder symptoms (CY-BOCS ≤ 14), overall functioning (COIS-R), and overall improvement in clinical condition (CGI-I ≤ 2). |         |          |                   |                    |           |         |                        |       |                                                    |                                                |  |
| b.                                                                                                                                                                                                                                                                                                                                                                                                                                                                                                                                                                                   | own calculation                                                                                                                                                                                                                                                                                                                      |         |          |                   |                    |           |         |                        |       |                                                    |                                                |  |
| c.                                                                                                                                                                                                                                                                                                                                                                                                                                                                                                                                                                                   | t-Test                                                                                                                                                                                                                                                                                                                               |         |          |                   |                    |           |         |                        |       |                                                    |                                                |  |
| d.                                                                                                                                                                                                                                                                                                                                                                                                                                                                                                                                                                                   | Chi-square test                                                                                                                                                                                                                                                                                                                      |         |          |                   |                    |           |         |                        |       |                                                    |                                                |  |
| e.                                                                                                                                                                                                                                                                                                                                                                                                                                                                                                                                                                                   | Linear Mixed Effects Regression Model                                                                                                                                                                                                                                                                                                |         |          |                   |                    |           |         |                        |       |                                                    |                                                |  |
| f.                                                                                                                                                                                                                                                                                                                                                                                                                                                                                                                                                                                   | Data on CGAS were only available for a subsample from Peris 2013 (21-24)                                                                                                                                                                                                                                                             |         |          |                   |                    |           |         |                        |       |                                                    |                                                |  |
| ↗                                                                                                                                                                                                                                                                                                                                                                                                                                                                                                                                                                                    | hint of a greater benefit of ST, one study                                                                                                                                                                                                                                                                                           |         |          |                   |                    |           |         |                        |       |                                                    |                                                |  |
| ↔                                                                                                                                                                                                                                                                                                                                                                                                                                                                                                                                                                                    | no proof or indication or hint of a greater benefit or harm, one study                                                                                                                                                                                                                                                               |         |          |                   |                    |           |         |                        |       |                                                    |                                                |  |
| ▲                                                                                                                                                                                                                                                                                                                                                                                                                                                                                                                                                                                    | effect in favour of ST                                                                                                                                                                                                                                                                                                               |         |          |                   |                    |           |         |                        |       |                                                    |                                                |  |
| ▼                                                                                                                                                                                                                                                                                                                                                                                                                                                                                                                                                                                    | effect to the disadvantage of ST                                                                                                                                                                                                                                                                                                     |         |          |                   |                    |           |         |                        |       |                                                    |                                                |  |
|                                                                                                                                                                                                                                                                                                                                                                                                                                                                                                                                                                                      | significant in <b>bold</b> (p < 0.05)                                                                                                                                                                                                                                                                                                |         |          |                   |                    |           |         |                        |       |                                                    |                                                |  |
| ADIS-c/p: Anxiety Disorders Interview Schedule for DSM-IV, child and parent version; BAI: Beck Anxiety Inventory; CGAS: Children's Global Assessment Scale; CGI-I: Clinical Global Impressions – Improvement; CI: Confidence interval; COM: Comparator; COIS-R: Child Obsessive Compulsive Impact Scale-Revised; CY-BOCS: Children's Yale-Brown Obsessive Compulsive Scale; DSM: Diagnostic and Statistical Manual of Mental Disorders; HAM-A: Hamilton Anxiety Rating Scale; MD: Mean difference; N: Number of analysed patients; OR: Odds Ratio; ST: Systemic Therapy; vs.: versus |                                                                                                                                                                                                                                                                                                                                      |         |          |                   |                    |           |         |                        |       |                                                    |                                                |  |

**A6.4 Tabular view – Class of mental disorders III: Eating disorders****Table 9:** Eating disorders – results for all patient-relevant outcomes with assessable data (multipage Table)

| No.               | Outcome                                                                                                                               | N   | N   | Effect  | Effect              | [95 %-CI]                   | p-value                    | Direction of effect | Study                  | Conclusion on benefit at outcome level | Conclusion on benefit across outcomes |
|-------------------|---------------------------------------------------------------------------------------------------------------------------------------|-----|-----|---------|---------------------|-----------------------------|----------------------------|---------------------|------------------------|----------------------------------------|---------------------------------------|
|                   | Operationalisation                                                                                                                    | ST  | COM | measure | estimate            |                             |                            |                     |                        |                                        |                                       |
|                   | Length of follow-up                                                                                                                   |     |     |         |                     |                             |                            |                     |                        |                                        |                                       |
| <b>ST vs. COM</b> |                                                                                                                                       |     |     |         |                     |                             |                            |                     |                        |                                        | ↔ <sup>a</sup>                        |
| <b>12</b>         | <b>Binge eating and compensatory behaviours</b>                                                                                       |     |     |         |                     |                             |                            |                     |                        |                                        | ↔                                     |
|                   | <b>Eating episodes in bulimia nervosa (number of episodes in the last 4 weeks)</b>                                                    |     |     |         |                     |                             |                            |                     |                        |                                        |                                       |
|                   | Month 6.4                                                                                                                             | 43  | 43  | MD      | -3.70 <sup>b</sup>  | [-10.60; 3.20] <sup>b</sup> | 0.289 <sup>b</sup>         | ▲                   | Le Grange 2015 (26-30) |                                        |                                       |
|                   | <b>Application of compensatory behaviours in bulimia nervosa (number of episodes)</b>                                                 |     |     |         |                     |                             |                            |                     |                        |                                        |                                       |
|                   | Month 6.4                                                                                                                             | 43  | 43  | MD      | -5.60 <sup>b</sup>  | [-12.91; 1.71] <sup>b</sup> | 0.13 <sup>b</sup>          | ▲                   | Le Grange 2015 (26-30) |                                        |                                       |
|                   | <b>Eating episodes in bulimia nervosa (number of episodes)</b>                                                                        |     |     |         |                     |                             |                            |                     |                        |                                        |                                       |
|                   | Month 0 – 12                                                                                                                          | n/a | n/a | n/a     | n/a                 | n/a                         | 0.21 <sup>c</sup>          | ?                   | Schmidt 2007 (34-37)   |                                        |                                       |
|                   | <b>Episodes of vomiting episodes in bulimia nervosa (number of episodes); average number of episodes per week in the last 28 days</b> |     |     |         |                     |                             |                            |                     |                        |                                        |                                       |
|                   | Month 0 – 12                                                                                                                          | n/a | n/a | n/a     | n/a                 | n/a                         | 0.20 <sup>c</sup>          | ?                   | Schmidt 2007 (34-37)   |                                        |                                       |
|                   | <b>No binge eating and compensatory behaviours (in bulimia nervosa)</b>                                                               |     |     |         |                     |                             |                            |                     |                        |                                        |                                       |
|                   | Month 6.4                                                                                                                             | 51  | 58  | RD      | 0.197 <sup>e</sup>  | n/a                         | <b>0.040<sup>e</sup></b>   | ▲                   | Le Grange 2015 (26-30) |                                        |                                       |
|                   | Month 12.4                                                                                                                            | 51  | 58  | RD      | 0.185 <sup>e</sup>  | n/a                         | <b>0.030<sup>e</sup></b>   | ▲                   | Le Grange 2015 (26-30) |                                        |                                       |
|                   | Month 18.4                                                                                                                            | 51  | 58  | RD      | 0.165 <sup>e</sup>  | n/a.                        | 0.130 <sup>e</sup>         | ▲                   | Le Grange 2015 (26-30) |                                        |                                       |
|                   | <b>Binge eating (in bulimia nervosa)</b>                                                                                              |     |     |         |                     |                             |                            |                     |                        |                                        |                                       |
|                   | Month 6                                                                                                                               | 32  | 31  | OR      | 0.33 <sup>b,f</sup> | [0.13; 0.86] <sup>b,f</sup> | <b>0.023<sup>b,f</sup></b> | ▼                   | Schmidt 2007 (34-37)   |                                        |                                       |
|                   | <b>Compensatory behaviours in bulimia nervosa (vomiting)</b>                                                                          |     |     |         |                     |                             |                            |                     |                        |                                        |                                       |
|                   | Month 6                                                                                                                               | 32  | 31  | OR      | 0.75 <sup>b,f</sup> | [0.30; 1.87] <sup>b,f</sup> | 0.537 <sup>b,f</sup>       | ▲                   | Schmidt 2007 (34-37)   |                                        |                                       |

**Table 9:** Eating disorders – results for all patient-relevant outcomes with assessable data (multipage Table)

| No.                                                                                                            | Outcome<br>Operationalisation<br>Length of follow-up | N<br>ST | N<br>COM | Effect<br>measure | Effect<br>estimate  | [95 %-CI]                   | p-value                 | Direction<br>of effect | Study                       | Conclusion<br>on benefit<br>at<br>outcome<br>level | Conclusion<br>on benefit<br>across<br>outcomes |
|----------------------------------------------------------------------------------------------------------------|------------------------------------------------------|---------|----------|-------------------|---------------------|-----------------------------|-------------------------|------------------------|-----------------------------|----------------------------------------------------|------------------------------------------------|
| <b>Binge eating and compensatory behaviours (in bulimia nervosa)</b>                                           |                                                      |         |          |                   |                     |                             |                         |                        |                             |                                                    |                                                |
|                                                                                                                | Month 6                                              | 32      | 31       | OR                | 0.63 <sup>b,f</sup> | [0.25; 1.61] <sup>b,f</sup> | 0.330 <sup>b,f</sup>    | ▲                      | Schmidt 2007 (34-37)        |                                                    |                                                |
| <b>reduced food intake (diet); (average number of days per week in the past 28 days) in bulimia nervosa</b>    |                                                      |         |          |                   |                     |                             |                         |                        |                             |                                                    |                                                |
|                                                                                                                | Month 6                                              | 32      | 31       | MD                | 0.30 <sup>b</sup>   | [-1.21; 1.81] <sup>b</sup>  | 0.693 <sup>b, g</sup>   | ▼                      | Schmidt 2007 (34-37)        |                                                    |                                                |
| <b>reduced food intake (fasting); (average number of days per week in the past 28 days) in bulimia nervosa</b> |                                                      |         |          |                   |                     |                             |                         |                        |                             |                                                    |                                                |
|                                                                                                                | Month 6                                              | 32      | 31       | MD                | 0.10 <sup>b</sup>   | [-0.78; 0.98] <sup>b</sup>  | 0.822 <sup>b, g</sup>   | ▼                      | Schmidt 2007 (34-37)        |                                                    |                                                |
| <b>13</b>                                                                                                      | <b>Body weight</b>                                   |         |          |                   |                     |                             |                         |                        |                             |                                                    | ↔                                              |
| <b>Body weight in anorexia nervosa (BMI)</b>                                                                   |                                                      |         |          |                   |                     |                             |                         |                        |                             |                                                    |                                                |
|                                                                                                                | Month 18                                             | 37      | 37       | MD                | 0.28                | [-0.51; 1.06]               | 0.49                    | ▼                      | Nyman-Carlsson 2019 (31-33) |                                                    |                                                |
|                                                                                                                | Month 36                                             | 37      | 37       | MD                | -0.64               | [-1.43; 0.15]               | 0.11                    | ▲                      | Nyman-Carlsson 2019 (31-33) |                                                    |                                                |
| <b>14</b>                                                                                                      | <b>Eating disorder</b>                               |         |          |                   |                     |                             |                         |                        |                             |                                                    | ↔                                              |
| <b>Diagnosis of anorexia nervosa</b>                                                                           |                                                      |         |          |                   |                     |                             |                         |                        |                             |                                                    |                                                |
|                                                                                                                | Month 18                                             | 37      | 37       | OR                | 1.00                | [0.19; 5.31] <sup>b</sup>   | > 0.999 <sup>b, h</sup> | ▼                      | Nyman-Carlsson 2019 (31-33) |                                                    |                                                |
|                                                                                                                | Month 36                                             | 37      | 37       | OR                | 0.19                | [0.01; 4.08] <sup>b</sup>   | 0.207 <sup>b, h</sup>   | ▲                      | Nyman-Carlsson 2019 (31-33) |                                                    |                                                |
| <b>Diagnosis of bulimia nervosa</b>                                                                            |                                                      |         |          |                   |                     |                             |                         |                        |                             |                                                    |                                                |
|                                                                                                                | Month 18                                             | 37      | 37       | OR                | 0.32                | [0.01; 8.23] <sup>b</sup>   | 0.528 <sup>b, h</sup>   | ▲                      | Nyman-Carlsson 2019 (31-33) |                                                    |                                                |
|                                                                                                                | Month 36                                             | 37      | 37       | OR                | 5.28                | [0.24; 113.87] <sup>b</sup> | 0.207 <sup>b, h</sup>   | ▼                      | Nyman-Carlsson 2019 (31-33) |                                                    |                                                |



**Table 9:** Eating disorders – results for all patient-relevant outcomes with assessable data (multipage Table)

| No.                                                                                                                                                                                              | Outcome<br>Operationalisation<br>Length of follow-up | N<br>ST | N<br>COM | Effect<br>measure | Effect<br>estimate | [95 %-CI]                    | p-value                      | Direction<br>of effect | Study                       | Conclusion<br>on benefit<br>at<br>outcome<br>level | Conclusion<br>on benefit<br>across<br>outcomes |
|--------------------------------------------------------------------------------------------------------------------------------------------------------------------------------------------------|------------------------------------------------------|---------|----------|-------------------|--------------------|------------------------------|------------------------------|------------------------|-----------------------------|----------------------------------------------------|------------------------------------------------|
| <b>Diagnosis of an unspecified eating disorder</b>                                                                                                                                               |                                                      |         |          |                   |                    |                              |                              |                        |                             |                                                    |                                                |
|                                                                                                                                                                                                  | Month 18                                             | 37      | 37       | OR                | 1.24               | [0.34; 4.48] <sup>b</sup>    | 0.834 <sup>b, h</sup>        | ▼                      | Nyman-Carlsson 2019 (31-33) |                                                    |                                                |
|                                                                                                                                                                                                  | Month 36                                             | 37      | 37       | OR                | 2.73               | [0.50; 15.09] <sup>b</sup>   | 0.269 <sup>b, h</sup>        | ▼                      | Nyman-Carlsson 2019 (31-33) |                                                    |                                                |
| <b>No diagnosis</b>                                                                                                                                                                              |                                                      |         |          |                   |                    |                              |                              |                        |                             |                                                    |                                                |
|                                                                                                                                                                                                  | Month 18                                             | 37      | 37       | OR                | 1.00               | [0.35; 2.89] <sup>b</sup>    | > 0.999 <sup>b, h</sup>      | ▲                      | Nyman-Carlsson 2019 (31-33) |                                                    |                                                |
|                                                                                                                                                                                                  | Month 36                                             | 37      | 37       | OR                | 0.52               | [0.14; 1.95] <sup>b</sup>    | 0.528 <sup>b, h</sup>        | ▼                      | Nyman-Carlsson 2019 (31-33) |                                                    |                                                |
| <b>15</b>                                                                                                                                                                                        | <b>Hospitalisation<br/>hospitalised patients</b>     |         |          |                   |                    |                              |                              |                        |                             |                                                    | ↔                                              |
|                                                                                                                                                                                                  | Week 0 – 8                                           | 51      | 58       | OR                | 0.11 <sup>b</sup>  | [0.01; 0.89] <sup>b</sup>    | <b>0.016</b> <sup>b, h</sup> | ▲                      | Le Grange 2015 (26-30)      |                                                    |                                                |
|                                                                                                                                                                                                  | Month 0 – 6.4                                        | 51      | 58       | OR                | 0.08 <sup>b</sup>  | [0.01; 0.61] <sup>b</sup>    | <b>0.015</b>                 | ▲                      | Le Grange 2015 (26-30)      |                                                    |                                                |
|                                                                                                                                                                                                  | Month 0 – 18                                         | 37      | 37       | OR                | 0.86 <sup>b</sup>  | [0.29; 2.54] <sup>b</sup>    | 0.867 <sup>b, h</sup>        | ▲                      | Nyman-Carlsson 2019 (31-33) |                                                    |                                                |
| <b>16</b>                                                                                                                                                                                        | <b>Symptoms of anorexia nervosa</b>                  |         |          |                   |                    |                              |                              |                        |                             |                                                    | ↔                                              |
| <b>EDI-3 GPMC (for anorexia nervosa); Subscale General Psychological Maladjustment Composite of the Eating Disorder Inventory to detect psychological symptoms relevant to eating disorders.</b> |                                                      |         |          |                   |                    |                              |                              |                        |                             |                                                    |                                                |
|                                                                                                                                                                                                  | Month 18                                             | 37      | 37       | MD                | -0.40 <sup>c</sup> | [-17.06; 16.20] <sup>c</sup> | 0.96 <sup>c</sup>            | ▼                      | Nyman-Carlsson 2019 (31-33) |                                                    |                                                |
|                                                                                                                                                                                                  | Month 36                                             | 37      | 37       | MD                | 2.80 <sup>c</sup>  | [-13.81; 19.50] <sup>c</sup> | 0.74 <sup>c</sup>            | ▲                      | Nyman-Carlsson 2019 (31-33) |                                                    |                                                |

**Table 9:** Eating disorders – results for all patient-relevant outcomes with assessable data (multipage Table)

| No.                                                                                                                                                        | Outcome<br>Operationalisation<br>Length of follow-up | N<br>ST | N<br>COM | Effect<br>measure | Effect<br>estimate | [95 %-CI]                  | p-value            | Direction<br>of effect | Study                       | Conclusion<br>on benefit<br>at<br>outcome<br>level | Conclusion<br>on benefit<br>across<br>outcomes |
|------------------------------------------------------------------------------------------------------------------------------------------------------------|------------------------------------------------------|---------|----------|-------------------|--------------------|----------------------------|--------------------|------------------------|-----------------------------|----------------------------------------------------|------------------------------------------------|
| <b>EDI-3 EDRC (for anorexia nervosa); Subscale Eating Disorder Risk Composite of the Eating Disorder Inventory to detect symptoms of eating disorders.</b> |                                                      |         |          |                   |                    |                            |                    |                        |                             |                                                    |                                                |
|                                                                                                                                                            | Month 18                                             | 37      | 37       | MD                | 0.10 <sup>c</sup>  | [-9.46; 9.56]              | 0.99               | ▲                      | Nyman-Carlsson 2019 (31-33) |                                                    |                                                |
|                                                                                                                                                            | Month 36                                             | 37      | 37       | MD                | 1.40 <sup>c</sup>  | [-8.13; 10.89]             | 0.78               | ▲                      | Nyman-Carlsson 2019 (31-33) |                                                    |                                                |
| <b>Eating Disorder Index (for anorexia nervosa)</b>                                                                                                        |                                                      |         |          |                   |                    |                            |                    |                        |                             |                                                    |                                                |
|                                                                                                                                                            | Month 18                                             | 37      | 37       | MD                | 0.05 <sup>c</sup>  | [-0.06; 0.16]              | 0.36               | ▲                      | Nyman-Carlsson 2019 (31-33) |                                                    |                                                |
|                                                                                                                                                            | Month 36                                             | 37      | 37       | MD                | 0.05 <sup>c</sup>  | [-0.09; 0.13]              | 0.74               | ▲                      | Nyman-Carlsson 2019 (31-33) |                                                    |                                                |
| <b>17</b>                                                                                                                                                  | <b>Symptoms of bulimia nervosa</b>                   |         |          |                   |                    |                            |                    |                        |                             |                                                    | ↔                                              |
| <b>global eating disorder symptomatology in bulimia nervosa (EDE global)</b>                                                                               |                                                      |         |          |                   |                    |                            |                    |                        |                             |                                                    |                                                |
|                                                                                                                                                            | Month 6.4                                            | 51      | 58       | Cohen's d         | 0.223 <sup>e</sup> | [-0.12; 0.56] <sup>b</sup> | 0.199 <sup>e</sup> | ▼                      | Le Grange 2015 (26-30)      |                                                    |                                                |
|                                                                                                                                                            | Month 12.4                                           | 51      | 58       | Cohen's d         | 0.142 <sup>e</sup> | [-0.27; 0.55] <sup>b</sup> | 0.495 <sup>e</sup> | ▼                      | Le Grange 2015 (26-30)      |                                                    |                                                |
|                                                                                                                                                            | Month 18.4                                           | 51      | 58       | Cohen's d         | 0.309 <sup>e</sup> | [-0.08; 0.70] <sup>b</sup> | 0.119 <sup>e</sup> | ▼                      | Le Grange 2015 (26-30)      |                                                    |                                                |
| <b>YBC total score (for bulimia nervosa)</b>                                                                                                               |                                                      |         |          |                   |                    |                            |                    |                        |                             |                                                    |                                                |
|                                                                                                                                                            | Month 6.4                                            | 51      | 58       | Cohen's d         | 0.291 <sup>e</sup> | [-0.06; 0.64] <sup>b</sup> | 0.100 <sup>e</sup> | ▼                      | Le Grange 2015 (26-30)      |                                                    |                                                |
|                                                                                                                                                            | Month 12.4                                           | 51      | 58       | Cohen's d         | 0.242 <sup>e</sup> | [-0.13; 0.62] <sup>b</sup> | 0.204 <sup>e</sup> | ▼                      | Le Grange 2015 (26-30)      |                                                    |                                                |
|                                                                                                                                                            | Month 18.4                                           | 51      | 58       | Cohen's d         | 0.289 <sup>e</sup> | [-0.09; 0.67] <sup>b</sup> | 0.133 <sup>e</sup> | ▼                      | Le Grange 2015 (26-30)      |                                                    |                                                |

**Table 9:** Eating disorders – results for all patient-relevant outcomes with assessable data (multipage Table)

| No. | Outcome                                                                                                                                                                                                                                                                                                                                                                                                                                                         | N  | N   | Effect  | Effect   | [95 %-CI] | p-value | Direction of effect | Study | Conclusion on benefit at outcome level | Conclusion on benefit across outcomes |
|-----|-----------------------------------------------------------------------------------------------------------------------------------------------------------------------------------------------------------------------------------------------------------------------------------------------------------------------------------------------------------------------------------------------------------------------------------------------------------------|----|-----|---------|----------|-----------|---------|---------------------|-------|----------------------------------------|---------------------------------------|
|     | Operationalisation                                                                                                                                                                                                                                                                                                                                                                                                                                              | ST | COM | measure | estimate |           |         |                     |       |                                        |                                       |
|     | Length of follow-up                                                                                                                                                                                                                                                                                                                                                                                                                                             |    |     |         |          |           |         |                     |       |                                        |                                       |
| a.  | No proof or indication or hint of a greater benefit or harm of ST across all outcomes based on the lack of unidirectional effects for hospitalisation, an inconsistent data situation for binge eating and compensatory behaviours, and statistically not significant effects for the remaining outcomes.                                                                                                                                                       |    |     |         |          |           |         |                     |       |                                        |                                       |
| b.  | own calculation                                                                                                                                                                                                                                                                                                                                                                                                                                                 |    |     |         |          |           |         |                     |       |                                        |                                       |
| c.  | Repeated measurements model                                                                                                                                                                                                                                                                                                                                                                                                                                     |    |     |         |          |           |         |                     |       |                                        |                                       |
| d.  | Linear Mixed Effects Regression Model                                                                                                                                                                                                                                                                                                                                                                                                                           |    |     |         |          |           |         |                     |       |                                        |                                       |
| e.  | Longitudinal Mixed Effects Model                                                                                                                                                                                                                                                                                                                                                                                                                                |    |     |         |          |           |         |                     |       |                                        |                                       |
| f.  | Proportional Odds Model (categories: abstinent / subclinical / clinical)                                                                                                                                                                                                                                                                                                                                                                                        |    |     |         |          |           |         |                     |       |                                        |                                       |
| g.  | t-test                                                                                                                                                                                                                                                                                                                                                                                                                                                          |    |     |         |          |           |         |                     |       |                                        |                                       |
| h.  | CSZ-Test (91)                                                                                                                                                                                                                                                                                                                                                                                                                                                   |    |     |         |          |           |         |                     |       |                                        |                                       |
|     | ↔: no proof hint or indication of a greater benefit or harm, one study                                                                                                                                                                                                                                                                                                                                                                                          |    |     |         |          |           |         |                     |       |                                        |                                       |
|     | ▲: effect in favour of ST                                                                                                                                                                                                                                                                                                                                                                                                                                       |    |     |         |          |           |         |                     |       |                                        |                                       |
|     | ▼: effect to the disadvantage of ST                                                                                                                                                                                                                                                                                                                                                                                                                             |    |     |         |          |           |         |                     |       |                                        |                                       |
|     | ?: Direction of effect is unclear.                                                                                                                                                                                                                                                                                                                                                                                                                              |    |     |         |          |           |         |                     |       |                                        |                                       |
|     | significant in <b>bold</b> (p < 0.05)                                                                                                                                                                                                                                                                                                                                                                                                                           |    |     |         |          |           |         |                     |       |                                        |                                       |
|     | BMI: Body-Mass-Index; CI: Confidence interval; COM: Comparator; EDE: Eating Disorder Examination; EDI: Eating Disorder Inventory; EDRC: EDI-3 Eating Disorder Risk Composite; GPMC: General Psychological Maladjustment Composite; MD: Mean difference; N: Number of analysed patients; n/a: not available or not specified in the study; OR: Odds Ratio; RD: Risk Difference, ST: Systemic Therapy; vs.: versus; YBC: Yale-Brown-Cornell Eating Disorder Scale |    |     |         |          |           |         |                     |       |                                        |                                       |

### A6.5 Forest plots – Class of mental disorders III: Eating disorders

Systemic therapy (ST) vs. Cognitive behavioural therapy (CBT)  
 Binge eating and compensatory behaviours, 6 months  
 Fixed effect model - Mantel-Haenszel (for presentation of the weights)

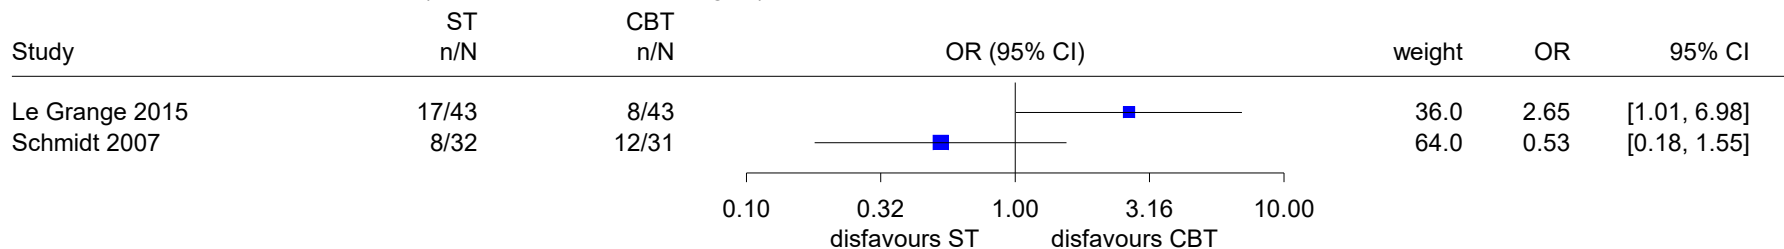

Heterogeneity: Q=4.76, df=1, p=0.029, I<sup>2</sup>=79.0%

**Figure 1:** Forest Plot for binge eating and compensatory behaviours after 6 months; Systemic Therapy (ST) vs. Cognitive Behavioural Therapy (CBT); Eating disorders

**A6.6 Tabular view – Class of mental disorders IV: Hyperkinetic disorders**

**Table 10:** Hyperkinetic disorders – results for all patient-relevant outcomes with assessable data (multipage Table)

| No.               | Outcome                                              | N  | N   | Effect    | Effect             | [95 %-CI]                  | p-value                      | Direction of effect | Study              | Conclusion on benefit at outcome level | Conclusion on benefit across outcomes |
|-------------------|------------------------------------------------------|----|-----|-----------|--------------------|----------------------------|------------------------------|---------------------|--------------------|----------------------------------------|---------------------------------------|
|                   | Operationalisation                                   | ST | COM | measure   | estimate           |                            |                              |                     |                    |                                        |                                       |
|                   | Length of follow-up                                  |    |     |           |                    |                            |                              |                     |                    |                                        |                                       |
| <b>ST vs. COM</b> |                                                      |    |     |           |                    |                            |                              |                     |                    |                                        | ↔ <sup>a</sup>                        |
| <b>18</b>         | <b>Discontinuations due to adverse events</b>        |    |     |           |                    |                            |                              |                     |                    | ↔                                      |                                       |
|                   | <b>Termination due to suicidal ideation</b>          |    |     |           |                    |                            |                              |                     |                    |                                        |                                       |
|                   | Month 2.1                                            | 67 | 79  | OR        | 0.39 <sup>b</sup>  | [0.02; 9.67] <sup>b</sup>  | 0.515 <sup>b, c</sup>        | ▲                   | Boyer 2015 (38-41) |                                        |                                       |
| <b>19</b>         | <b>Executive functioning</b>                         |    |     |           |                    |                            |                              |                     |                    | ↔                                      |                                       |
|                   | <b>BRIEF, total score Global Executive Composite</b> |    |     |           |                    |                            |                              |                     |                    |                                        |                                       |
|                   | Month 2.1                                            | 67 | 79  | Hedges' g | 0.25 <sup>b</sup>  | [-0.08; 0.57] <sup>b</sup> | 0.137 <sup>b, d</sup>        | ▼                   | Boyer 2015 (38-41) |                                        |                                       |
|                   | Month 5.1                                            | 59 | 77  | Hedges' g | 0.11 <sup>b</sup>  | [-0.23; 0.45] <sup>b</sup> | 0.532 <sup>b, d</sup>        | ▼                   | Boyer 2015 (38-41) |                                        |                                       |
|                   | <b>BRIEF-Subscale plan / organize</b>                |    |     |           |                    |                            |                              |                     |                    |                                        |                                       |
|                   | Month 2.1                                            | 67 | 79  | Hedges' g | 0.36 <sup>b</sup>  | [0.03; 0.69] <sup>b</sup>  | 0.031 <sup>b, d</sup>        | ▼                   | Boyer 2015 (38-41) |                                        |                                       |
|                   | Month 5.1                                            | 59 | 77  | Hedges' g | 0.35 <sup>b</sup>  | [0.01; 0.69] <sup>b</sup>  | <b>0.043</b> <sup>b, d</sup> | ▼                   | Boyer 2015 (38-41) |                                        |                                       |
|                   | <b>D-KEFS Tower test (neuropsychological Test)</b>   |    |     |           |                    |                            |                              |                     |                    |                                        |                                       |
|                   | Month 2.1                                            | 67 | 79  | Hedges' g | 0.05 <sup>b</sup>  | [-0.28; 0.37] <sup>b</sup> | 0.775 <sup>b, d</sup>        | ▲                   | Boyer 2015 (38-41) |                                        |                                       |
|                   | Month 5.1                                            | 59 | 77  | Hedges' g | 0.00 <sup>b</sup>  | [-0.34; 0.34] <sup>b</sup> | 0.988 <sup>b, d</sup>        | ?                   | Boyer 2015 (38-41) |                                        |                                       |
|                   | <b>D-KEFS TMT (neuropsychological Test)</b>          |    |     |           |                    |                            |                              |                     |                    |                                        |                                       |
|                   | Month 2.1                                            | 67 | 79  | Hedges' g | -0.02 <sup>b</sup> | [-0.34; 0.31] <sup>b</sup> | 0.918 <sup>b, d</sup>        | ▲                   | Boyer 2015 (38-41) |                                        |                                       |
|                   | Month 5.1                                            | 59 | 77  | Hedges' g | -0.04 <sup>b</sup> | [-0.38; 0.30] <sup>b</sup> | 0.814 <sup>b, d</sup>        | ▲                   | Boyer 2015 (38-41) |                                        |                                       |
|                   | <b>BADS Key search (neuropsychological Test)</b>     |    |     |           |                    |                            |                              |                     |                    |                                        |                                       |
|                   | Month 2.1                                            | 67 | 79  | Hedges' g | 0.03 <sup>b</sup>  | [-0.30; 0.36] <sup>b</sup> | 0.857 <sup>b, d</sup>        | ▲                   | Boyer 2015 (38-41) |                                        |                                       |
|                   | Month 5.1                                            | 59 | 77  | Hedges' g | 0.23 <sup>b</sup>  | [-0.11; 0.57] <sup>b</sup> | 0.181 <sup>b, d</sup>        | ▲                   | Boyer 2015 (38-41) |                                        |                                       |

**Table 10:** Hyperkinetic disorders – results for all patient-relevant outcomes with assessable data (multipage Table)

| No.                                           | Outcome<br>Operationalisation<br>Length of follow-up | N<br>ST | N<br>COM | Effect<br>measure | Effect<br>estimate | [95 %-CI]                  | p-value                      | Direction<br>of effect | Study              | Conclusion<br>on benefit<br>at<br>outcome<br>level | Conclusion<br>on benefit<br>across<br>outcomes |
|-----------------------------------------------|------------------------------------------------------|---------|----------|-------------------|--------------------|----------------------------|------------------------------|------------------------|--------------------|----------------------------------------------------|------------------------------------------------|
| <b>BADS Zoo map (neuropsychological Test)</b> |                                                      |         |          |                   |                    |                            |                              |                        |                    |                                                    |                                                |
|                                               | Month 2.1                                            | 67      | 79       | Hedges' g         | -0.27 <sup>b</sup> | [-0.60; 0.06] <sup>b</sup> | 0.105 <sup>b, d</sup>        | ▲                      | Boyer 2015 (38-41) |                                                    |                                                |
|                                               | Month 5.1                                            | 59      | 77       | Hedges' g         | 0.00 <sup>b</sup>  | [-0.34; 0.34] <sup>b</sup> | > 0.999 <sup>b, d</sup>      | ?                      | Boyer 2015 (38-41) |                                                    |                                                |
| <b>20</b>                                     | <b>Externalising problems</b>                        |         |          |                   |                    |                            |                              |                        |                    |                                                    | ↔                                              |
| <b>CBCL, externalising problems scale</b>     |                                                      |         |          |                   |                    |                            |                              |                        |                    |                                                    |                                                |
|                                               | Month 2.1                                            | 67      | 79       | Hedges' g         | 0.13 <sup>b</sup>  | [-0.19; 0.46] <sup>b</sup> | 0.424 <sup>b, d</sup>        | ▼                      | Boyer 2015 (38-41) |                                                    |                                                |
|                                               | Month 5.1                                            | 59      | 77       | Hedges' g         | -0.15 <sup>b</sup> | [-0.49; 0.19] <sup>b</sup> | 0.377 <sup>b, d</sup>        | ▲                      | Boyer 2015 (38-41) |                                                    |                                                |
| <b>21</b>                                     | <b>Overall functioning</b>                           |         |          |                   |                    |                            |                              |                        |                    |                                                    | ↔                                              |
| <b>Homework Problems Checklist</b>            |                                                      |         |          |                   |                    |                            |                              |                        |                    |                                                    |                                                |
|                                               | Month 2.1                                            | 67      | 79       | Hedges' g         | 0.36 <sup>b</sup>  | [0.04; 0.69] <sup>b</sup>  | <b>0.029</b> <sup>b, d</sup> | ▼                      | Boyer 2015 (38-41) |                                                    |                                                |
|                                               | Month 5.1                                            | 59      | 77       | Hedges' g         | 0.12 <sup>b</sup>  | [-0.22; 0.45] <sup>b</sup> | 0.504 <sup>b, d</sup>        | ▼                      | Boyer 2015 (38-41) |                                                    |                                                |
| <b>IRS</b>                                    |                                                      |         |          |                   |                    |                            |                              |                        |                    |                                                    |                                                |
|                                               | Month 2.1                                            | 67      | 79       | Hedges' g         | 0.11 <sup>b</sup>  | [-0.21; 0.44] <sup>b</sup> | 0.498 <sup>b, d</sup>        | ▼                      | Boyer 2015 (38-41) |                                                    |                                                |
|                                               | Month 5.1                                            | 59      | 77       | Hedges' g         | 0.03 <sup>b</sup>  | [-0.31; 0.37] <sup>b</sup> | 0.869 <sup>b, d</sup>        | ▼                      | Boyer 2015 (38-41) |                                                    |                                                |

**Table 10:** Hyperkinetic disorders – results for all patient-relevant outcomes with assessable data (multipage Table)

| No.                                                                                                                                                                                                                                                                                                                                                                                                                                                                                                                                                                                                                                                                                                                                                                                                                                                                                                                                                                                       | Outcome             | N  | N   | Effect  | Effect   | [95 %-CI] | p-value | Direction of effect | Study | Conclusion on benefit at outcome level | Conclusion on benefit across outcomes |
|-------------------------------------------------------------------------------------------------------------------------------------------------------------------------------------------------------------------------------------------------------------------------------------------------------------------------------------------------------------------------------------------------------------------------------------------------------------------------------------------------------------------------------------------------------------------------------------------------------------------------------------------------------------------------------------------------------------------------------------------------------------------------------------------------------------------------------------------------------------------------------------------------------------------------------------------------------------------------------------------|---------------------|----|-----|---------|----------|-----------|---------|---------------------|-------|----------------------------------------|---------------------------------------|
|                                                                                                                                                                                                                                                                                                                                                                                                                                                                                                                                                                                                                                                                                                                                                                                                                                                                                                                                                                                           | Operationalisation  | ST | COM | measure | estimate |           |         |                     |       |                                        |                                       |
|                                                                                                                                                                                                                                                                                                                                                                                                                                                                                                                                                                                                                                                                                                                                                                                                                                                                                                                                                                                           | Length of follow-up |    |     |         |          |           |         |                     |       |                                        |                                       |
| <p>a. No proof or indication or hint of a greater benefit or harm of ST across all outcomes based on effects which were either statistically not significant or were classified as not clinically relevant.</p> <p>b. own calculation</p> <p>c. CSZ-Test (91)</p> <p>d. t-Test</p> <p>↔: no proof or indication or hint of a greater benefit or harm, one study</p> <p>▲: effect in favour of ST</p> <p>▼: effect to the disadvantage of ST</p> <p>?: Direction of effect is unclear.</p> <p>significant in <b>bold</b> (p &lt; 0.05)</p> <p>BADS: Behavioural Assessment of the Dysexecutive Syndrome; BRIEF: Behaviour Rating Inventory of Executive Function; CBCL: Child Behaviour Checklist; CI: Confidence interval; COM: Comparator; D-KEFS: Delis-Kaplan Executive Function System; IRS: Impairment Rating Scale; ST: Systemic Therapy; N: Number of analysed patients; n/a: not available or not specified in the study; OR: Odds Ratio; TMT: Trail Making Test; vs.: versus</p> |                     |    |     |         |          |           |         |                     |       |                                        |                                       |

**A6.7 Tabular view – Class of mental disorders V: Mental and behavioural disorders due to psychoactive substance use**

**Table 11:** Mental and behavioural disorders due to psychoactive substance use – results for all patient-relevant outcomes with assessable data (multipage Table)

| No.               | Outcome                                                                                                                                                  | N                | N                | Effect          | Effect             | [95 %-CI]                  | p-value                  | Direction of effect | Study                       | Conclusion on benefit at outcome level | Conclusion on benefit across outcomes |
|-------------------|----------------------------------------------------------------------------------------------------------------------------------------------------------|------------------|------------------|-----------------|--------------------|----------------------------|--------------------------|---------------------|-----------------------------|----------------------------------------|---------------------------------------|
|                   | Operationalisation                                                                                                                                       | ST               | COM              | measure         | estimate           |                            |                          |                     |                             |                                        |                                       |
|                   | Length of follow-up                                                                                                                                      |                  |                  |                 |                    |                            |                          |                     |                             |                                        |                                       |
| <b>ST vs. COM</b> |                                                                                                                                                          |                  |                  |                 |                    |                            |                          |                     |                             |                                        | ↗ <sup>a</sup>                        |
| <b>22</b>         | <b>Cannabis use disorder</b>                                                                                                                             |                  |                  |                 |                    |                            |                          |                     |                             |                                        | ↗                                     |
|                   | <b>ADI-Light for Cannabis, Diagnosis of cannabis use disorder, specialised interview to detect symptoms of cannabis use disorder according to DSM-IV</b> |                  |                  |                 |                    |                            |                          |                     |                             |                                        |                                       |
|                   | Month 12                                                                                                                                                 | 212              | 238              | OR <sup>b</sup> | 1.68 <sup>c</sup>  | [1.15; 2.44] <sup>c</sup>  | <b>0.007<sup>c</sup></b> | ▲                   | INCANT (51-73)              |                                        |                                       |
| <b>23</b>         | <b>Externalising problems</b>                                                                                                                            |                  |                  |                 |                    |                            |                          |                     |                             |                                        | ↕↗                                    |
|                   | <b>Externalising subscale of YSR</b>                                                                                                                     |                  |                  |                 |                    |                            |                          |                     |                             |                                        |                                       |
|                   | Month 0–2                                                                                                                                                | 57               | 56               | n/a             | n/a                | n/a                        | ≥ 0.05 <sup>d</sup>      | ?                   | Liddle 2018 (82, 83)        |                                        |                                       |
|                   | Month 2                                                                                                                                                  | 57               | 55               | Hedges' g       | -0.18              | [-0.55; 0.19] <sup>c</sup> | 0.341 <sup>c, e</sup>    | ▲                   | Liddle 2018 (82, 83)        |                                        |                                       |
|                   | Month 3                                                                                                                                                  | 49               | 46               | Hedges' g       | 0.11 <sup>c</sup>  | [-0.29; 0.51] <sup>c</sup> | 0.598 <sup>c, e</sup>    | ▼                   | Slesnick 2013 (84-88)       |                                        |                                       |
|                   | Month 4                                                                                                                                                  | 55               | 54               | MD              | 0.82 <sup>c</sup>  | [-3.37; 5.01] <sup>c</sup> | 0.699 <sup>c, e</sup>    | ▼                   | Liddle 2018 (82, 83)        |                                        |                                       |
|                   | Month 6                                                                                                                                                  | 54               | 52               | MD              | 1.07 <sup>c</sup>  | [-2.93; 5.07] <sup>c</sup> | 0.597 <sup>c, e</sup>    | ▼                   | Dakof 2015 (49, 50)         |                                        |                                       |
|                   |                                                                                                                                                          | 163 <sup>f</sup> | 183 <sup>f</sup> | MD              | -0.04 <sup>c</sup> | [-1.93; 1.85] <sup>c</sup> | 0.967 <sup>c, e</sup>    | ▲                   | INCANT <sup>g</sup> (51-73) |                                        |                                       |
|                   |                                                                                                                                                          | 42               | 42               | MD              | -2.18 <sup>c</sup> | [-7.21; 2.85] <sup>c</sup> | 0.391 <sup>c, e</sup>    | ▲                   | Slesnick 2013 (84-88)       |                                        |                                       |
|                   | Month 9                                                                                                                                                  | 47               | 40               | Hedges' g       | -0.07 <sup>c</sup> | [-0.50; 0.35] <sup>c</sup> | 0.726 <sup>c, e</sup>    | ▲                   | Slesnick 2013 (84-88)       |                                        |                                       |
|                   | Month 12                                                                                                                                                 | 46               | 45               | MD              | -0.53 <sup>c</sup> | [-4.24; 3.18] <sup>c</sup> | 0.777 <sup>c, e</sup>    | ▲                   | Dakof 2015 (49, 50)         |                                        |                                       |
|                   |                                                                                                                                                          | 56               | 53               | MD              | -0.64 <sup>c</sup> | [-4.58; 3.30] <sup>c</sup> | 0.748 <sup>c</sup>       | ▲                   | Liddle 2018 (82, 83)        |                                        |                                       |
|                   |                                                                                                                                                          | 180 <sup>f</sup> | 202 <sup>f</sup> | MD              | -0.48 <sup>c</sup> | [-2.28; 1.32] <sup>c</sup> | 0.600 <sup>c, e</sup>    | ▲                   | INCANT <sup>g</sup> (51-73) |                                        |                                       |
|                   |                                                                                                                                                          | 58               | 60               | n/a             | n/a                | n/a                        | 0.401                    | ?                   | INCANT <sup>h</sup> (51-73) |                                        |                                       |
|                   |                                                                                                                                                          | 46               | 39               | MD              | 1.72 <sup>c</sup>  | [-2.43; 5.87] <sup>c</sup> | 0.412 <sup>c</sup>       | ▼                   | Slesnick 2013 (84-88)       |                                        |                                       |



**Table 11:** Mental and behavioural disorders due to psychoactive substance use – results for all patient-relevant outcomes with assessable data (multipage Table)

| No.                                                                            | Outcome<br>Operationalisation<br>Length of follow-up | N<br>ST          | N<br>COM         | Effect<br>measure | Effect<br>estimate | [95 %-CI]                       | p-value                     | Direction<br>of effect | Study                       | Conclu-<br>sion on<br>benefit at<br>outcome<br>level | Conclu-<br>sion on<br>benefit<br>across<br>outcomes |
|--------------------------------------------------------------------------------|------------------------------------------------------|------------------|------------------|-------------------|--------------------|---------------------------------|-----------------------------|------------------------|-----------------------------|------------------------------------------------------|-----------------------------------------------------|
|                                                                                | Month 18                                             | 47               | 46               | MD                | 0.88 <sup>c</sup>  | [-2.77; 4.53] <sup>c</sup>      | 0.633 <sup>c, e</sup>       | ▼                      | Dakof 2015 (49, 50)         |                                                      |                                                     |
|                                                                                |                                                      | 57               | 55               | MD                | -2.01 <sup>c</sup> | [-5.73; 1.71] <sup>c</sup>      | 0.286 <sup>c</sup>          | ▲                      | Liddle 2018 (82, 83)        |                                                      |                                                     |
|                                                                                |                                                      | 45               | 41               | MD                | 0.35 <sup>c</sup>  | [-4.07; 4.77] <sup>c</sup>      | 0.875 <sup>c</sup>          | ▼                      | Slesnick 2013 (84-88)       |                                                      |                                                     |
|                                                                                | Month 2 – 18                                         | 57               | 56               | n/a               | n/a                | n/a                             | ≥ 0.05 <sup>d</sup>         | ?                      | Liddle 2018 (82, 83)        |                                                      |                                                     |
|                                                                                | Month 24                                             | 51               | 43               | MD                | -1.82 <sup>c</sup> | [-5.38; 1.74] <sup>c</sup>      | 0.313 <sup>c, e</sup>       | ▲                      | Dakof 2015 (49, 50)         |                                                      |                                                     |
|                                                                                |                                                      | 43               | 41               | MD                | -1.77 <sup>c</sup> | [-6.11; 2.57] <sup>c</sup>      | 0.419 <sup>c, e</sup>       | ▲                      | Slesnick 2013 (84-88)       |                                                      |                                                     |
|                                                                                | Month 0 – 24                                         | n/a              | n/a              | n/a               | n/a                | n/a                             | ≥ 0.05 <sup>i</sup>         | ?                      | Slesnick 2013 (84-88)       |                                                      |                                                     |
|                                                                                | Month 7 – 24                                         | 55               | 57               | Cohen's d         | 0.39 <sup>d</sup>  | [0.02; 0.76] <sup>c</sup>       | <b>0.039<sup>d</sup></b>    | ▲                      | Dakof 2015 (49, 50)         |                                                      |                                                     |
| <b>Externalising subscale, parent / primary caretaker version of YSR, CBCL</b> |                                                      |                  |                  |                   |                    |                                 |                             |                        |                             |                                                      |                                                     |
|                                                                                | Month 3                                              | 49               | 47               | Hedges' g         | -0.18 <sup>c</sup> | [-0.58; 0.22] <sup>c</sup>      | 0.367 <sup>c, e</sup>       | ▲                      | Slesnick 2013 (84-88)       |                                                      |                                                     |
|                                                                                | Month 4                                              | n/a              | n/a              | n/a               | n/a                | n/a                             | > 0.05                      | n/a                    | Waldron 2001 (89, 90)       |                                                      |                                                     |
|                                                                                | Month 6                                              | 161 <sup>f</sup> | 180 <sup>f</sup> | MD                | -0.32 <sup>c</sup> | [-2.80; 2.16] <sup>c</sup>      | 0.800 <sup>c, e</sup>       | ▲                      | INCANT <sup>g</sup> (51-73) |                                                      |                                                     |
|                                                                                |                                                      | 42               | 43               | MD                | -6.11 <sup>c</sup> | [-12.20;<br>-0.02] <sup>c</sup> | <b>0.049<sup>c, e</sup></b> | ▲                      | Slesnick 2013 (84-88)       |                                                      |                                                     |
|                                                                                | Month 7                                              | n/a              | n/a              | n/a               | n/a                | n/a                             | > 0.05                      | n/a                    | Waldron 2001 (89, 90)       |                                                      |                                                     |
|                                                                                | Month 9                                              | 46               | 41               | Hedges' g         | -0.11 <sup>c</sup> | [-0.54; 0.31] <sup>c</sup>      | 0.593 <sup>c, e</sup>       | ▲                      | Slesnick 2013 (84-88)       |                                                      |                                                     |
|                                                                                | Month 12                                             | 171 <sup>f</sup> | 193 <sup>f</sup> | MD                | 0.99 <sup>c</sup>  | [-1.17; 3.15] <sup>c</sup>      | 0.368 <sup>c, e</sup>       | ▼                      | INCANT <sup>g</sup> (51-73) |                                                      |                                                     |
|                                                                                |                                                      | 59               | 61               | n/a               | n/a                | n/a                             | 0.175 <sup>j</sup>          | ?                      | INCANT <sup>h</sup> (51-73) |                                                      |                                                     |
|                                                                                |                                                      | 49               | 42               | MD                | -3.92 <sup>c</sup> | [-9.28; 1.44] <sup>c</sup>      | 0.150 <sup>c, e</sup>       | ▲                      | Slesnick 2013 (84-88)       |                                                      |                                                     |
|                                                                                | Month 18                                             | 44               | 40               | Hedges' g         | -0.61 <sup>c</sup> | [-1.05; -0.17] <sup>c</sup>     | <b>0.006<sup>c, e</sup></b> | ▲                      | Slesnick 2013 (84-88)       |                                                      |                                                     |
|                                                                                | Month 24                                             | 41               | 38               | Hedges' g         | -0.63 <sup>c</sup> | [-1.08; -0.18] <sup>c</sup>     | <b>0.006<sup>c, e</sup></b> | ▲                      | Slesnick 2013 (84-88)       |                                                      |                                                     |
|                                                                                | Month 0 – 24                                         | n/a              | n/a              | n/a               | n/a                | n/a                             | ≥ 0.05 <sup>i</sup>         | ?                      | Slesnick 2013 (84-88)       |                                                      |                                                     |

**Table 11:** Mental and behavioural disorders due to psychoactive substance use – results for all patient-relevant outcomes with assessable data (multipage Table)

| No.       | Outcome<br>Operationalisation<br>Length of follow-up | N<br>ST          | N<br>COM         | Effect<br>measure | Effect<br>estimate | [95 %-CI]                                | p-value               | Direction<br>of effect | Study                       | Conclu-<br>sion on<br>benefit at<br>outcome<br>level | Conclu-<br>sion on<br>benefit<br>across<br>outcomes |
|-----------|------------------------------------------------------|------------------|------------------|-------------------|--------------------|------------------------------------------|-----------------------|------------------------|-----------------------------|------------------------------------------------------|-----------------------------------------------------|
| <b>24</b> | <b>Internalising problems</b>                        |                  |                  |                   |                    |                                          |                       |                        |                             |                                                      | ↔                                                   |
|           | <b>Internalising subscale of YSR</b>                 |                  |                  |                   |                    |                                          |                       |                        |                             |                                                      |                                                     |
|           | Month 2                                              | 57               | 55               | Hedges' g         | -0.36 <sup>c</sup> | [-0.73; 0.01] <sup>c</sup>               | 0.058 <sup>c, e</sup> | ▲                      | Liddle 2018 (82, 83)        |                                                      |                                                     |
|           | Month 0–2                                            | 57               | 56               | n/a               | n/a                | n/a                                      | < 0.01 <sup>d</sup>   | ▲                      | Liddle 2018 (82, 83)        |                                                      |                                                     |
|           | Month 3                                              | 49               | 45               | Hedges' g         | 0.29 <sup>c</sup>  | [-0.12; 0.69] <sup>c</sup>               | 0.164 <sup>c, e</sup> | ▼                      | Slesnick 2013 (84-88)       |                                                      |                                                     |
|           | Month 4                                              | 55               | 54               | MD                | -1.07 <sup>c</sup> | [-5.60; 3.46] <sup>c</sup>               | 0.641 <sup>c, e</sup> | ▲                      | Liddle 2018 (82, 83)        |                                                      |                                                     |
|           | Month 6                                              | 163 <sup>f</sup> | 183 <sup>f</sup> | MD                | -1.03 <sup>c</sup> | [-2.78 <sup>c</sup> ; 0.72] <sup>c</sup> | 0.249 <sup>c, e</sup> | ▲                      | INCANT <sup>g</sup> (51-73) |                                                      |                                                     |
|           |                                                      | 42               | 42               | MD                | -2.49 <sup>c</sup> | [-8.06; 3.08] <sup>c</sup>               | 0.377 <sup>c, e</sup> | ▲                      | Slesnick 2013 (84-88)       |                                                      |                                                     |
|           | Month 9                                              | 47               | 40               | Hedges' g         | 0.07 <sup>c</sup>  | [-0.35; 0.49] <sup>c</sup>               | 0.745 <sup>c, e</sup> | ▲                      | Slesnick 2013 (84-88)       |                                                      |                                                     |
|           | Month 12                                             | 180 <sup>f</sup> | 202 <sup>f</sup> | MD                | -0.94 <sup>c</sup> | [-0.77; 0.89] <sup>c</sup>               | 0.312 <sup>c, e</sup> | ▲                      | INCANT <sup>k</sup> (51-73) |                                                      |                                                     |
|           |                                                      | 58               | 60               | n/a               | n/a                | n/a                                      | 0.281 <sup>j</sup>    | ?                      | INCANT <sup>h</sup> (51-73) |                                                      |                                                     |
|           |                                                      | 56               | 53               | MD                | -2.73 <sup>c</sup> | [-6.45; 0.99] <sup>c</sup>               | 0.148 <sup>c, e</sup> | ▲                      | Liddle 2018 (82, 83)        |                                                      |                                                     |
|           |                                                      | 45               | 39               | MD                | 0.61 <sup>c</sup>  | [-4.18; 5.40] <sup>c</sup>               | 0.801 <sup>c, e</sup> | ▼                      | Slesnick 2013 (84-88)       |                                                      |                                                     |
|           | Month 18                                             | 57               | 55               | MD                | -1.08 <sup>c</sup> | [-4.71; 2.55] <sup>c</sup>               | 0.556 <sup>c, e</sup> | ▲                      | Liddle 2018 (82, 83)        |                                                      |                                                     |
|           |                                                      | 45               | 41               | MD                | 1.30 <sup>c</sup>  | [-2.89; 5.49] <sup>c</sup>               | 0.539 <sup>c, e</sup> | ▼                      | Slesnick 2013 (84-88)       |                                                      |                                                     |
|           | Month 2–18                                           | 57               | 56               | n/a               | n/a                | n/a                                      | ≥ 0.05 <sup>d</sup>   | ?                      | Liddle 2018 (82, 83)        |                                                      |                                                     |
|           | Month 24                                             | 43               | 41               | Hedges' g         | -0.06 <sup>c</sup> | [-0.49; 0.37] <sup>c</sup>               | 0.787 <sup>c, e</sup> | ▲                      | Slesnick 2013 (84-88)       |                                                      |                                                     |
|           | Month 0–24                                           | n/a              | n/a              | n/a               | n/a                | n/a                                      | ≥ 0.05 <sup>i</sup>   | ?                      | Slesnick 2013 (84-88)       |                                                      |                                                     |

**Table 11:** Mental and behavioural disorders due to psychoactive substance use – results for all patient-relevant outcomes with assessable data (multipage Table)

| No.                                                                            | Outcome<br>Operationalisation<br>Length of follow-up                            | N<br>ST          | N<br>COM         | Effect<br>measure | Effect<br>estimate | [95 %-CI]                   | p-value                       | Direction<br>of effect | Study                       | Conclu-<br>sion on<br>benefit at<br>outcome<br>level | Conclu-<br>sion on<br>benefit<br>across<br>outcomes |
|--------------------------------------------------------------------------------|---------------------------------------------------------------------------------|------------------|------------------|-------------------|--------------------|-----------------------------|-------------------------------|------------------------|-----------------------------|------------------------------------------------------|-----------------------------------------------------|
| <b>Internalising subscale, parent / primary caretaker version of YSR, CBCL</b> |                                                                                 |                  |                  |                   |                    |                             |                               |                        |                             |                                                      |                                                     |
|                                                                                | Month 3                                                                         | 49               | 47               | Hedges' g         | -0.15 <sup>c</sup> | [-0.55; 0.25] <sup>c</sup>  | 0.460 <sup>c</sup>            | ▲                      | Slesnick 2013 (84-88)       |                                                      |                                                     |
|                                                                                | Month 4                                                                         | n/a              | n/a              | n/a               | n/a                | n/a                         | > 0.05                        | ?                      | Waldron 2001 (89, 90)       |                                                      |                                                     |
|                                                                                | Month 6                                                                         | 161 <sup>f</sup> | 180 <sup>f</sup> | MD                | -1.31 <sup>c</sup> | [-3.52; 0.90] <sup>c</sup>  | 0.245 <sup>c</sup>            | ▲                      | INCANT <sup>g</sup> (51-73) |                                                      |                                                     |
|                                                                                |                                                                                 | 42               | 43               | MD                | -3.05 <sup>c</sup> | [-7.43; 1.33] <sup>c</sup>  | 0.169 <sup>c</sup>            | ▲                      | Slesnick 2013 (84-88)       |                                                      |                                                     |
|                                                                                | Month 7                                                                         | n/a              | n/a              | n/a               | n/a                | n/a                         | > 0.05                        | ?                      | Waldron 2001 (89, 90)       |                                                      |                                                     |
|                                                                                | Month 9                                                                         | 47               | 41               | Hedges' g;        | -0.02 <sup>c</sup> | [-0.44; 0.40] <sup>c</sup>  | 0.933 <sup>c</sup>            | ▲                      | Slesnick 2013 (84-88)       |                                                      |                                                     |
|                                                                                | Month 12                                                                        | 49               | 42               | MD                | -2.17 <sup>c</sup> | [-5.90; 1.56] <sup>c</sup>  | 0.251 <sup>c</sup>            | ▲                      | Slesnick 2013 (84-88)       |                                                      |                                                     |
|                                                                                |                                                                                 | 171 <sup>f</sup> | 192 <sup>f</sup> | MD                | -0.88 <sup>c</sup> | [-2.84; 1.08] <sup>c</sup>  | 0.377 <sup>c</sup>            | ▲                      | INCANT <sup>k</sup> (51-73) |                                                      |                                                     |
|                                                                                |                                                                                 | 58               | 61               | n/a               | n/a                | n/a                         | 0.096 <sup>j</sup>            | ?                      | INCANT <sup>h</sup> (51-73) |                                                      |                                                     |
|                                                                                | Month 18                                                                        | 44               | 40               | Hedges' g         | -0.62 <sup>c</sup> | [-1.06; -0.18] <sup>c</sup> | 0.005 <sup>c, e</sup>         | ▲                      | Slesnick 2013 (84-88)       |                                                      |                                                     |
|                                                                                | Month 24                                                                        | 41               | 38               | Hedges' g         | -0.53 <sup>c</sup> | [-0.98; -0.08] <sup>c</sup> | 0.020 <sup>c, e</sup>         | ▲                      | Slesnick 2013 (84-88)       |                                                      |                                                     |
|                                                                                | Month 0 – 24                                                                    | n/a              | n/a              | n/a               | n/a                | n/a                         | ≥ 0.05 <sup>i</sup>           | ?                      | Slesnick 2013 (84-88)       |                                                      |                                                     |
| <b>25</b>                                                                      | <b>Symptoms of cannabis use disorder</b>                                        |                  |                  |                   |                    |                             |                               |                        |                             |                                                      | ↗                                                   |
|                                                                                | <b>ADI-Light for Cannabis, number of symptoms</b>                               |                  |                  |                   |                    |                             |                               |                        |                             |                                                      |                                                     |
|                                                                                | Month 12                                                                        | 190              | 211              | MD                | -0.60 <sup>c</sup> | [-0.99; -0.21] <sup>c</sup> | <b>0.003<sup>c, e</sup></b>   | ▲                      | INCANT (51-73)              |                                                      |                                                     |
|                                                                                | Month 0 – 12                                                                    | 212              | 238              | Cohen's d         | 1.27 <sup>d</sup>  | [0.51; 2.03]                | <b>&lt; 0.001<sup>d</sup></b> | ▲                      | INCANT (51-73)              |                                                      |                                                     |
| <b>26</b>                                                                      | <b>Substance use (any substance, self-report)</b>                               |                  |                  |                   |                    |                             |                               |                        |                             |                                                      | ↔                                                   |
|                                                                                | <b>GAIN, days without consumption of cannabis, alcohol and other substances</b> |                  |                  |                   |                    |                             |                               |                        |                             |                                                      |                                                     |
|                                                                                | Month 12                                                                        | 94               | 94 <sup>l</sup>  | MD                | 6 <sup>c</sup>     | n/a                         | > 0.05                        | ▲                      | CYT (42-48)                 |                                                      |                                                     |
|                                                                                | Month 12                                                                        | 94               | 94 <sup>m</sup>  | MD                | -8 <sup>c</sup>    | n/a                         | > 0.05                        | ▼                      | CYT (42-48)                 |                                                      |                                                     |

**Table 11:** Mental and behavioural disorders due to psychoactive substance use – results for all patient-relevant outcomes with assessable data (multipage Table)

| No.       | Outcome<br>Operationalisation<br>Length of follow-up                                                                                                                 | N<br>ST | N<br>COM | Effect<br>measure | Effect<br>estimate | [95 %-CI]                   | p-value               | Direction<br>of effect | Study                       | Conclu-<br>sion on<br>benefit at<br>outcome<br>level | Conclu-<br>sion on<br>benefit<br>across<br>outcomes |
|-----------|----------------------------------------------------------------------------------------------------------------------------------------------------------------------|---------|----------|-------------------|--------------------|-----------------------------|-----------------------|------------------------|-----------------------------|------------------------------------------------------|-----------------------------------------------------|
| <b>27</b> | <b>Substance use detected by laboratory tests</b>                                                                                                                    |         |          |                   |                    |                             |                       |                        |                             |                                                      | ↔                                                   |
|           | <b>Urine analyses of substance use, THC</b>                                                                                                                          |         |          |                   |                    |                             |                       |                        |                             |                                                      |                                                     |
|           | Month 12                                                                                                                                                             | 52      | 51       | OR                | 0.97 <sup>c</sup>  | [0.40; 2.37] <sup>c</sup>   | > 0.05 <sup>c</sup>   | ▲                      | INCANT (51-73)              |                                                      |                                                     |
|           | <b>Urine analyses of substance use, all substances</b>                                                                                                               |         |          |                   |                    |                             |                       |                        |                             |                                                      |                                                     |
|           | Month 4                                                                                                                                                              | n/a     | n/a      | n/a               | n/a                | n/a                         | > 0.05                | ?                      | Waldron 2001 (89, 90)       |                                                      |                                                     |
|           | Month 7                                                                                                                                                              | n/a     | n/a      | n/a               | n/a                | n/a                         | > 0.05                | ?                      | Waldron 2001 (89, 90)       |                                                      |                                                     |
| <b>28</b> | <b>Substance use problem severity</b>                                                                                                                                |         |          |                   |                    |                             |                       |                        |                             |                                                      | ↔                                                   |
|           | <b>PEI/PIC, 29 Items, subscore focusing on the psychological and behavioural depth of substance use involvement and related consequences in the previous 90 days</b> |         |          |                   |                    |                             |                       |                        |                             |                                                      |                                                     |
|           | Month 6                                                                                                                                                              | 54      | 52       | MD                | 1.04 <sup>c</sup>  | [-4.35; 6.43] <sup>c</sup>  | 0.703 <sup>c, e</sup> | ▼                      | Dakof 2015 (49, 50)         |                                                      |                                                     |
|           |                                                                                                                                                                      | 59      | 60       | MD                | -5.80 <sup>c</sup> | [-12.24; 0.64] <sup>c</sup> | 0.077 <sup>c, e</sup> | ▲                      | INCANT <sup>h</sup> (51-73) |                                                      |                                                     |
|           |                                                                                                                                                                      | 29      | 27       | Cohen's d         | 0.09 <sup>e</sup>  | n/a                         | > 0.05 <sup>e</sup>   | ▲                      | INCANT <sup>k</sup> (51-73) |                                                      |                                                     |
|           | Month 9                                                                                                                                                              | 59      | 60       | MD                | -5.40 <sup>c</sup> | [-11.74; 0.94] <sup>c</sup> | 0.094 <sup>c, e</sup> | ▲                      | INCANT <sup>h</sup> (51-73) |                                                      |                                                     |
|           |                                                                                                                                                                      | 29      | 27       | Cohen's d         | 0.36 <sup>e</sup>  | n/a                         | > 0.05 <sup>e</sup>   | ▲                      | INCANT <sup>k</sup> (51-73) |                                                      |                                                     |
|           | Month 12                                                                                                                                                             | 46      | 45       | MD                | 0.23 <sup>c</sup>  | [-6.23; 6.69] <sup>c</sup>  | 0.944 <sup>c, e</sup> | ▼                      | Dakof 2015 (49, 50)         |                                                      |                                                     |
|           |                                                                                                                                                                      | 59      | 60       | Cohen's d         | n/a                | n/a                         | 0.082 <sup>j</sup>    | ▲                      | INCANT <sup>h</sup> (51-73) |                                                      |                                                     |
|           | Month 12                                                                                                                                                             | 29      | 27       | Cohen's d         | 0.34 <sup>e</sup>  | n/a                         | > 0.05 <sup>e</sup>   | ▲                      | INCANT <sup>k</sup> (51-73) |                                                      |                                                     |
|           | Month 18                                                                                                                                                             | 47      | 46       | MD                | 0.21 <sup>c</sup>  | [-6.29; 6.71] <sup>c</sup>  | 0.949 <sup>c, e</sup> | ▼                      | Dakof 2015 (49, 50)         |                                                      |                                                     |
|           | Month 24                                                                                                                                                             | 51      | 43       | Hedges' g         | -0.22 <sup>c</sup> | [-0.63; 0.19] <sup>c</sup>  | 0.284 <sup>c, e</sup> | ▲                      | Dakof 2015 (49, 50)         |                                                      |                                                     |
|           | Month 7 – 24                                                                                                                                                         | 55      | 57       | Cohen's d         | 0.54 <sup>d</sup>  | n/a                         | 0.078 <sup>d</sup>    | ▲                      | Dakof 2015 (49, 50)         |                                                      |                                                     |

**Table 11:** Mental and behavioural disorders due to psychoactive substance use – results for all patient-relevant outcomes with assessable data (multipage Table)

| No.                                                                                                                                                                  | Outcome<br>Operationalisation<br>Length of follow-up | N<br>ST          | N<br>COM         | Effect<br>measure | Effect<br>estimate | [95 %-CI]                           | p-value               | Direction<br>of effect | Study                | Conclu-<br>sion on<br>benefit at<br>outcome<br>level | Conclu-<br>sion on<br>benefit<br>across<br>outcomes |
|----------------------------------------------------------------------------------------------------------------------------------------------------------------------|------------------------------------------------------|------------------|------------------|-------------------|--------------------|-------------------------------------|-----------------------|------------------------|----------------------|------------------------------------------------------|-----------------------------------------------------|
| <b>PEI/PIC, 29 Items, subscore focusing on the psychological and behavioural depth of substance use involvement and related consequences in the previous 30 days</b> |                                                      |                  |                  |                   |                    |                                     |                       |                        |                      |                                                      |                                                     |
|                                                                                                                                                                      | Month 0 – 18                                         | 112              | 112              | n/a               | n/a                | n/a                                 | < 0.05 <sup>d</sup>   | ▲                      | Liddle 2018 (82, 83) |                                                      |                                                     |
|                                                                                                                                                                      | Month 2                                              | 57               | 55               | Hedges' g         | 0.47               | [0.10; 0.85] <sup>c</sup>           | 0.013 <sup>c, e</sup> | ▼                      | Liddle 2018 (82, 83) |                                                      |                                                     |
|                                                                                                                                                                      | Month 0 –2                                           | 57               | 56               | n/a               | n/a                | n/a                                 | ≥ 0.05 <sup>d</sup>   | ?                      | Liddle 2018 (82, 83) |                                                      |                                                     |
|                                                                                                                                                                      | Month 4                                              | 55               | 54               | MD                | 1.47 <sup>c</sup>  | [-3.65; 6.59] <sup>c</sup>          | 0.571 <sup>c, e</sup> | ▼                      | Liddle 2018 (82, 83) |                                                      |                                                     |
|                                                                                                                                                                      | Month 12                                             | 56               | 53               | MD                | -2.62 <sup>c</sup> | [-8.77; 3.53] <sup>c</sup>          | 0.400 <sup>c, e</sup> | ▲                      | Liddle 2018 (82, 83) |                                                      |                                                     |
|                                                                                                                                                                      | Month 18                                             | 57               | 55               | MD                | -2.22 <sup>c</sup> | [-7.34; 2.90] <sup>c</sup>          | 0.392 <sup>c, e</sup> | ▲                      | Liddle 2018 (82, 83) |                                                      |                                                     |
|                                                                                                                                                                      | Month 2 –18                                          | 57               | 56               | Cohen's d         | 0.51 <sup>d</sup>  | [> 0.12;<br>< 0.90] <sup>c, n</sup> | < 0.01 <sup>d</sup>   | ▲                      | Liddle 2018 (82, 83) |                                                      |                                                     |
| <b>29</b>                                                                                                                                                            | <b>Use of cannabis</b>                               |                  |                  |                   |                    |                                     |                       |                        |                      |                                                      | ↑                                                   |
| <b>TLFB, daily cannabis consumption in the previous 90 days</b>                                                                                                      |                                                      |                  |                  |                   |                    |                                     |                       |                        |                      |                                                      |                                                     |
|                                                                                                                                                                      | Month 3                                              | 184 <sup>c</sup> | 207 <sup>c</sup> | MD                | -5.80 <sup>c</sup> | [-12.04; 0.44] <sup>c</sup>         | 0.068 <sup>c, e</sup> | ▲                      | INCANT (51-73)       |                                                      |                                                     |
|                                                                                                                                                                      | Month 6                                              | 172 <sup>c</sup> | 193 <sup>c</sup> | MD                | -7.90 <sup>c</sup> | [-14.45;<br>-1.35] <sup>c</sup>     | 0.018 <sup>c, e</sup> | ▲                      | INCANT (51-73)       |                                                      |                                                     |
|                                                                                                                                                                      | Month 9                                              | 165 <sup>c</sup> | 186 <sup>c</sup> | MD                | -5.80 <sup>c</sup> | [-12.68; 1.08] <sup>c</sup>         | 0.098 <sup>c, e</sup> | ▲                      | INCANT (51-73)       |                                                      |                                                     |
|                                                                                                                                                                      | Month 12                                             | 190              | 211              | Cohen's d         | -8.30 <sup>c</sup> | [-14.83;<br>-1.77] <sup>c</sup>     | 0.013 <sup>e</sup>    | ▲                      | INCANT (51-73)       |                                                      |                                                     |
|                                                                                                                                                                      | Month 0 –12                                          | 212              | 238              | Cohen's d         | 0.25 <sup>d</sup>  | n/a                                 | 0.07 <sup>d</sup>     | ▼                      | INCANT (51-73)       |                                                      |                                                     |
| <b>TLFB, number of joints in the previous 90 days</b>                                                                                                                |                                                      |                  |                  |                   |                    |                                     |                       |                        |                      |                                                      |                                                     |
|                                                                                                                                                                      | Month 12                                             | 52               | 51               | MD                | -4.80 <sup>c</sup> | [-42.93;<br>33.33] <sup>c</sup>     | 0.803 <sup>c, e</sup> | ▲                      | INCANT (51-73)       |                                                      |                                                     |
|                                                                                                                                                                      | Month 0 –12                                          | 55               | 54               | Cohen's d         | 0.13 <sup>d</sup>  | n/a                                 | 0.50 <sup>d</sup>     | ▼                      | INCANT (51-73)       |                                                      |                                                     |

**Table 11:** Mental and behavioural disorders due to psychoactive substance use – results for all patient-relevant outcomes with assessable data (multipage Table)

| No.                                                                                           | Outcome<br>Operationalisation<br>Length of follow-up                                 | N<br>ST | N<br>COM | Effect<br>measure | Effect<br>estimate | [95 %-CI]                     | p-value               | Direction<br>of effect | Study                 | Conclu-<br>sion on<br>benefit at<br>outcome<br>level | Conclu-<br>sion on<br>benefit<br>across<br>outcomes |
|-----------------------------------------------------------------------------------------------|--------------------------------------------------------------------------------------|---------|----------|-------------------|--------------------|-------------------------------|-----------------------|------------------------|-----------------------|------------------------------------------------------|-----------------------------------------------------|
| <b>TLFB, daily cannabis consumption in the previous 30 days</b>                               |                                                                                      |         |          |                   |                    |                               |                       |                        |                       |                                                      |                                                     |
|                                                                                               | Month 0–12                                                                           | 112     | 112      | n/a               | n/a                | n/a                           | ≥ 0.05 <sup>d</sup>   | ?                      | Liddle 2008 (74-81)   |                                                      |                                                     |
| <b>FORM 90D/TLFB; days with cannabis consumption in the previous 90 days</b>                  |                                                                                      |         |          |                   |                    |                               |                       |                        |                       |                                                      |                                                     |
|                                                                                               | Month 4                                                                              | n/a     | n/a      | n/a               | n/a                | n/a                           | < 0.025 <sup>o</sup>  | ▲                      | Waldron 2001 (89, 90) |                                                      |                                                     |
|                                                                                               | Month 7                                                                              | n/a     | n/a      | n/a               | n/a                | n/a                           | < 0.10 <sup>o</sup>   | ?                      | Waldron 2001 (89, 90) |                                                      |                                                     |
| <b>ADI-Light for Cannabis, Response</b>                                                       |                                                                                      |         |          |                   |                    |                               |                       |                        |                       |                                                      |                                                     |
|                                                                                               | Month 12                                                                             | 52      | 51       | OR                | 0.89 <sup>c</sup>  | [0.41; 1.95] <sup>c</sup>     | 0.78 <sup>c, e</sup>  | ▼                      | INCANT (51-73)        |                                                      |                                                     |
| <b>ADI-Light for Cannabis, Abstinence</b>                                                     |                                                                                      |         |          |                   |                    |                               |                       |                        |                       |                                                      |                                                     |
|                                                                                               | Month 12                                                                             | 52      | 51       | OR                | 1.13               | [0.40; 3.19]                  | 0.64                  | ▲                      | INCANT (51-73)        |                                                      |                                                     |
| <b>FORM 90D/TLFB, self reported minimal cannabis consumption</b>                              |                                                                                      |         |          |                   |                    |                               |                       |                        |                       |                                                      |                                                     |
|                                                                                               | Month 4                                                                              | 30      | 31       | OR                | 1.87 <sup>c</sup>  | [0.65; 5.39] <sup>c</sup>     | 0.265 <sup>c, e</sup> | ▲                      | Waldron 2001 (89, 90) |                                                      |                                                     |
|                                                                                               | Month 7                                                                              | 30      | 31       | OR                | 3.01 <sup>c</sup>  | [0.90; 10.11] <sup>c</sup>    | 0.074 <sup>c, e</sup> | ▲                      | Waldron 2001 (89, 90) |                                                      |                                                     |
| <b>30</b>                                                                                     | <b>Use of substances for which criteria for a substance use disorder are not met</b> |         |          |                   |                    |                               |                       |                        |                       |                                                      | ↑↓                                                  |
| <b>TLFB, days with cannabis consumption in the previous 30 days</b>                           |                                                                                      |         |          |                   |                    |                               |                       |                        |                       |                                                      |                                                     |
|                                                                                               | Month 0–12                                                                           | 112     | 112      | Cohen's d         | 0.32 <sup>d</sup>  | [> 0.00; < 2.03] <sup>c</sup> | < 0.05 <sup>d</sup>   | ▲                      | Liddle 2008 (74-81)   |                                                      |                                                     |
| <b>TLFB, days with alcohol consumption in the previous 30 days</b>                            |                                                                                      |         |          |                   |                    |                               |                       |                        |                       |                                                      |                                                     |
|                                                                                               | Month 0–12                                                                           | 112     | 112      | n/a               | n/a                | n/a                           | ≥ 0.05 <sup>d</sup>   | ?                      | Liddle 2008 (74-81)   |                                                      |                                                     |
| <b>FORM 90, percentage of substance abuse (defined as percentage of the previous 90 days)</b> |                                                                                      |         |          |                   |                    |                               |                       |                        |                       |                                                      |                                                     |
|                                                                                               | Month 3                                                                              | 48      | 45       | MD                | -3.20 <sup>c</sup> | [-16.72; 10.32] <sup>c</sup>  | 0.639 <sup>c, e</sup> | ▲                      | Slesnick 2013 (84-88) |                                                      |                                                     |
|                                                                                               | Month 6                                                                              | 41      | 42       | MD                | 5.00 <sup>c</sup>  | [-6.66; 16.66] <sup>c</sup>   | 0.398 <sup>c, e</sup> | ▼                      | Slesnick 2013 (84-88) |                                                      |                                                     |

**Table 11:** Mental and behavioural disorders due to psychoactive substance use – results for all patient-relevant outcomes with assessable data (multipage Table)

| No.                                                                        | Outcome<br>Operationalisation<br>Length of follow-up | N<br>ST | N<br>COM | Effect<br>measure | Effect<br>estimate | [95 %-CI]                   | p-value                      | Direction<br>of effect | Study                       | Conclu-<br>sion on<br>benefit at<br>outcome<br>level | Conclu-<br>sion on<br>benefit<br>across<br>outcomes |
|----------------------------------------------------------------------------|------------------------------------------------------|---------|----------|-------------------|--------------------|-----------------------------|------------------------------|------------------------|-----------------------------|------------------------------------------------------|-----------------------------------------------------|
|                                                                            | Month 9                                              | 46      | 41       | MD                | 18.60 <sup>c</sup> | [6.16; 31.04] <sup>c</sup>  | <b>0.004</b> <sup>c, e</sup> | ▲                      | Slesnick 2013 (84-88)       |                                                      |                                                     |
|                                                                            | Month 12                                             | 46      | 40       | MD                | 6.40 <sup>c</sup>  | [-6.77; 19.57] <sup>c</sup> | 0.337 <sup>c, e</sup>        | ▼                      | Slesnick 2013 (84-88)       |                                                      |                                                     |
|                                                                            | Month 18                                             | 45      | 41       | MD                | 11.40 <sup>c</sup> | [-2.92; 25.72] <sup>c</sup> | 0.117 <sup>c, e</sup>        | ▼                      | Slesnick 2013 (84-88)       |                                                      |                                                     |
|                                                                            | Month 24                                             | 39      | 41       | MD                | 7.50 <sup>c</sup>  | [-9.39; 24.39] <sup>c</sup> | 0.379 <sup>c, e</sup>        | ▼                      | Slesnick 2013 (84-88)       |                                                      |                                                     |
|                                                                            | Month 0–24                                           | 57      | 61       | n/a               | n/a                | n/a                         | > 0.05 <sup>p</sup>          | ?                      | Slesnick 2013 (84-88)       |                                                      |                                                     |
| <b>ADI-Light, use of amphetamine in the previous 12 months</b>             |                                                      |         |          |                   |                    |                             |                              |                        |                             |                                                      |                                                     |
|                                                                            | Month 12                                             | 59      | 61       | OR                | 1.17               | [0.53; 2.59]                | 0.694                        | ▼                      | INCANT <sup>h</sup> (51-73) |                                                      |                                                     |
| <b>ADI-Light, use of ecstasy in the previous 12 months</b>                 |                                                      |         |          |                   |                    |                             |                              |                        |                             |                                                      |                                                     |
|                                                                            | Month 12                                             | 59      | 61       | OR                | 1.01               | [0.46; 2.24]                | 0.973                        | ▼                      | INCANT <sup>h</sup> (51-73) |                                                      |                                                     |
| <b>ADI-Light, use of cocaine / crack in the previous 12 months</b>         |                                                      |         |          |                   |                    |                             |                              |                        |                             |                                                      |                                                     |
|                                                                            | Month 12                                             | 59      | 61       | OR                | 1.42               | [0.56; 3.66]                | 0.460                        | ▼                      | INCANT <sup>h</sup> (51-73) |                                                      |                                                     |
| <b>ADI-Light, use of hallucinogen in the previous 12 months</b>            |                                                      |         |          |                   |                    |                             |                              |                        |                             |                                                      |                                                     |
|                                                                            | Month 12                                             | 59      | 61       | OR                | 10.72              | [1.56; 73.24]               | <b>0.016</b>                 | ▼                      | INCANT <sup>h</sup> (51-73) |                                                      |                                                     |
| <b>ADI-Light, use of sedatives /tranquilizer in the previous 12 months</b> |                                                      |         |          |                   |                    |                             |                              |                        |                             |                                                      |                                                     |
|                                                                            | Month 12                                             | 59      | 61       | OR                | 1.41               | [0.41; 4.82]                | 0.581                        | ▼                      | INCANT <sup>h</sup> (51-73) |                                                      |                                                     |
| <b>ADI-Light, use of heroin /opiates in the previous 12 months</b>         |                                                      |         |          |                   |                    |                             |                              |                        |                             |                                                      |                                                     |
|                                                                            | Month 12                                             | 59      | 61       | OR                | 0.33               | [0.00; 2.10]                | 0.107                        | ▲                      | INCANT <sup>h</sup> (51-73) |                                                      |                                                     |

**Table 11:** Mental and behavioural disorders due to psychoactive substance use – results for all patient-relevant outcomes with assessable data (multipage Table)

| No. | Outcome<br>Operationalisation<br>Length of follow-up                                                                                                                                                                  | N<br>ST | N<br>COM | Effect<br>measure | Effect<br>estimate | [95 %-CI] | p-value | Direction<br>of effect | Study | Conclu-<br>sion on<br>benefit at<br>outcome<br>level | Conclu-<br>sion on<br>benefit<br>across<br>outcomes |  |
|-----|-----------------------------------------------------------------------------------------------------------------------------------------------------------------------------------------------------------------------|---------|----------|-------------------|--------------------|-----------|---------|------------------------|-------|------------------------------------------------------|-----------------------------------------------------|--|
| a.  | Hint of a greater benefit of ST compared to CBT across all outcomes based on the statistically significant effects in favour of ST for cannabis use disorder, symptoms of cannabis use disorder, and use of cannabis. |         |          |                   |                    |           |         |                        |       |                                                      |                                                     |  |
| b.  | Proportional Odds Model (categories: remission / abuse / dependence)                                                                                                                                                  |         |          |                   |                    |           |         |                        |       |                                                      |                                                     |  |
| c.  | own calculation                                                                                                                                                                                                       |         |          |                   |                    |           |         |                        |       |                                                      |                                                     |  |
| d.  | Latent Growth Curve Model                                                                                                                                                                                             |         |          |                   |                    |           |         |                        |       |                                                      |                                                     |  |
| e.  | t-Test                                                                                                                                                                                                                |         |          |                   |                    |           |         |                        |       |                                                      |                                                     |  |
| f.  | N estimated from overall follow-up completion rates                                                                                                                                                                   |         |          |                   |                    |           |         |                        |       |                                                      |                                                     |  |
| g.  | whole sample                                                                                                                                                                                                          |         |          |                   |                    |           |         |                        |       |                                                      |                                                     |  |
| h.  | German sample                                                                                                                                                                                                         |         |          |                   |                    |           |         |                        |       |                                                      |                                                     |  |
| i.  | Multilevel Model (Random Coefficient Model)                                                                                                                                                                           |         |          |                   |                    |           |         |                        |       |                                                      |                                                     |  |
| j.  | ANCOVA, adjusted for Baseline, LOCF                                                                                                                                                                                   |         |          |                   |                    |           |         |                        |       |                                                      |                                                     |  |
| k.  | Swiss sample                                                                                                                                                                                                          |         |          |                   |                    |           |         |                        |       |                                                      |                                                     |  |
| l.  | comparator: MET/CBT5                                                                                                                                                                                                  |         |          |                   |                    |           |         |                        |       |                                                      |                                                     |  |
| m.  | comparator: ACRA                                                                                                                                                                                                      |         |          |                   |                    |           |         |                        |       |                                                      |                                                     |  |
| n.  | based on effect measure and p-value                                                                                                                                                                                   |         |          |                   |                    |           |         |                        |       |                                                      |                                                     |  |
| o.  | Regression analysis, adjusted for baseline value                                                                                                                                                                      |         |          |                   |                    |           |         |                        |       |                                                      |                                                     |  |
| p.  | Mixed-Effects Model                                                                                                                                                                                                   |         |          |                   |                    |           |         |                        |       |                                                      |                                                     |  |
| ↔:  | no proof or indication or hint of a greater benefit or harm, one study                                                                                                                                                |         |          |                   |                    |           |         |                        |       |                                                      |                                                     |  |
| ↗:  | hint of a greater benefit of ST, one study                                                                                                                                                                            |         |          |                   |                    |           |         |                        |       |                                                      |                                                     |  |
| ↑:  | indication of a greater benefit (supported by meta-analysis)                                                                                                                                                          |         |          |                   |                    |           |         |                        |       |                                                      |                                                     |  |
| ⇔:  | no proof or indication or hint of a greater benefit or harm (homogeneous result between several studies)                                                                                                              |         |          |                   |                    |           |         |                        |       |                                                      |                                                     |  |
| ↑↓: | no proof or indication or hint of a greater benefit or harm (heterogeneous result between several studies)                                                                                                            |         |          |                   |                    |           |         |                        |       |                                                      |                                                     |  |
| ▲:  | effect in favour of ST                                                                                                                                                                                                |         |          |                   |                    |           |         |                        |       |                                                      |                                                     |  |
| ▼:  | effect to the disadvantage of ST                                                                                                                                                                                      |         |          |                   |                    |           |         |                        |       |                                                      |                                                     |  |
| ?:  | Direction of effect is unclear.                                                                                                                                                                                       |         |          |                   |                    |           |         |                        |       |                                                      |                                                     |  |
|     | significant in <b>bold</b> ( $p < 0.05$ )                                                                                                                                                                             |         |          |                   |                    |           |         |                        |       |                                                      |                                                     |  |



**Table 11:** Mental and behavioural disorders due to psychoactive substance use – results for all patient-relevant outcomes with assessable data (multipage Table)

| No. | Outcome             | N  | N   | Effect  | Effect   | [95 %-CI] | p-value | Direction<br>of effect | Study | Conclu-<br>sion on<br>benefit at<br>outcome<br>level | Conclu-<br>sion on<br>benefit<br>across<br>outcomes |
|-----|---------------------|----|-----|---------|----------|-----------|---------|------------------------|-------|------------------------------------------------------|-----------------------------------------------------|
|     | Operationalisation  | ST | COM | measure | estimate |           |         |                        |       |                                                      |                                                     |
|     | Length of follow-up |    |     |         |          |           |         |                        |       |                                                      |                                                     |

ACRA: Adolescent Community Reinforcement Approach; ADI: Adolescent Diagnostic Interview; CBCL: Child Behaviour Checklist; CI: Confidence interval; COM: Comparator; DSM-IV: Diagnostic and Statistical Manual of Mental Disorders (4<sup>th</sup> edition); GAIN: Global Appraisal of Individual Needs; LOCF: Last Observation Carried Forward; MD: Mean difference; MET/CBT5: Motivational Enhancement Therapy plus Cognitive Behavioural Therapy (5 sessions); N: number of analysed patients; n/a: not available or not specified in the study; OR: Odds Ratio; PEI: Personal Experience Inventory; PIC: Personal Involvement with Chemicals scale of the PEI; ST: Systemic Therapy; THC: tetrahydrocannabinol; TLFB: Timeline Follow-Back; vs.: versus; YSR: Youth Self-Report

### A6.8 Forest plots – Class of mental disorders V: Mental and behavioural disorders due to psychoactive substance use

Systemic therapy (ST) vs. Cognitive behavioural therapy (CBT)  
 Externalising problems, YSR, 4 or 6 months  
 Random effects model - Knapp and Hartung

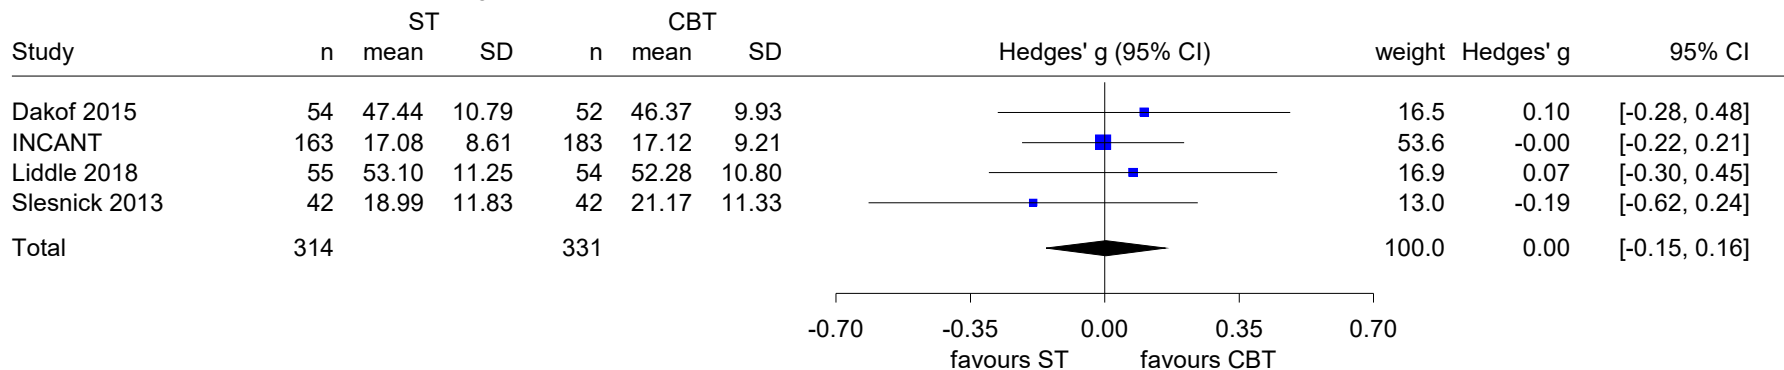

Heterogeneity:  $Q=1.15$ ,  $df=3$ ,  $p=0.764$ ,  $I^2=0\%$   
 Overall effect:  $Z\text{-Score}=0.06$ ,  $p=0.959$ ,  $\text{Tau(Paule-Mandel)}=0$

**Figure 2:** Forest Plot for externalising problems (YSR) after 4 or 6 months; Systemic Therapy (ST) vs. Cognitive Behavioural Therapy (CBT); Mental and behavioural disorders due to psychoactive substance use

Systemic therapy (ST) vs. Cognitive behavioural therapy (CBT)  
 Externalising problems, CBCL, 6 months  
 Fixed effect model - inverse variance

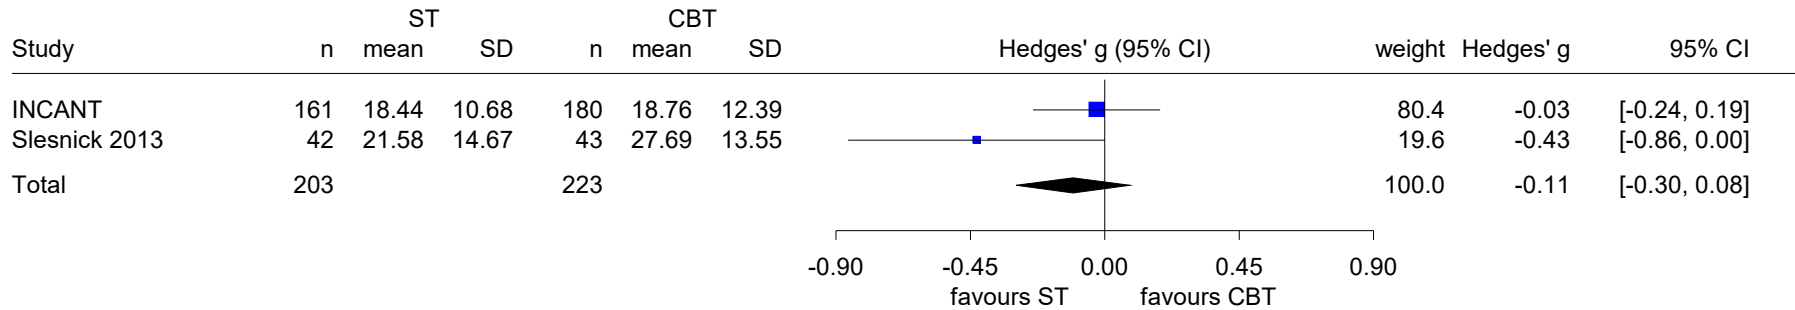

Heterogeneity:  $Q=2.69$ ,  $df=1$ ,  $p=0.101$ ,  $I^2=62.8\%$   
 Overall effect:  $Z\text{-Score}=-1.09$ ,  $p=0.275$

**Figure 3:** Forest Plot for externalising problems (CBCL) after 6 months; Systemic Therapy (ST) vs. Cognitive Behavioural Therapy (CBT); Mental and behavioural disorders due to psychoactive substance use

Systemic therapy (ST) vs. Cognitive behavioural therapy (CBT)  
 Externalising problems, YSR, 12 months  
 Random effects model - Knapp and Hartung (variance corr.)

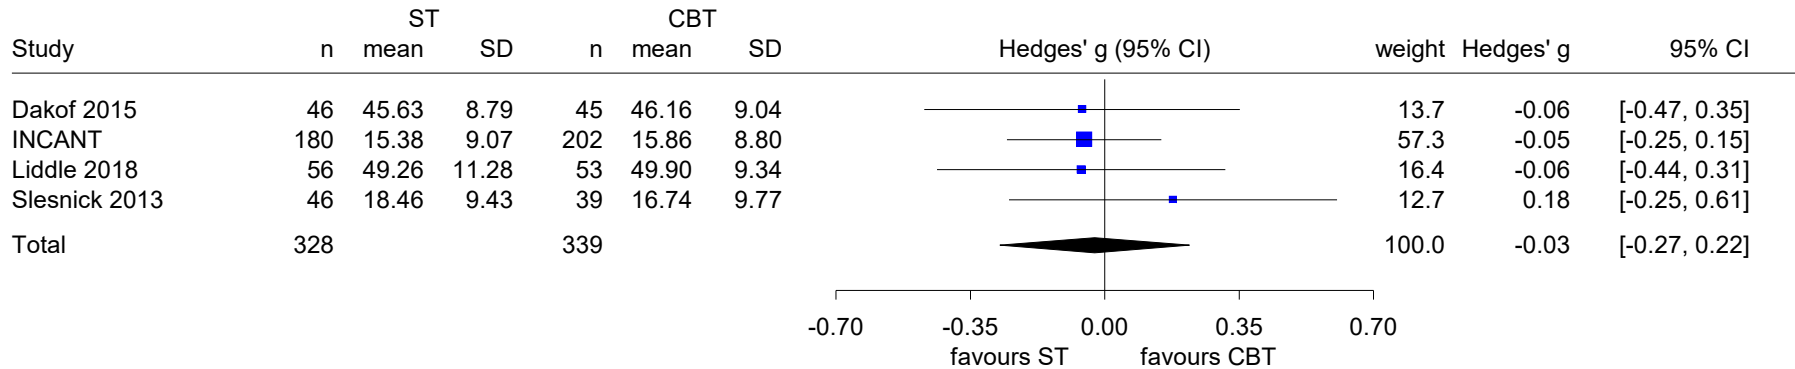

Heterogeneity:  $Q=1.00$ ,  $df=3$ ,  $p=0.800$ ,  $I^2=0\%$   
 Overall effect:  $Z\text{-Score}=-0.34$ ,  $p=0.757$ ,  $\text{Tau(Paule-Mandel)}=0$

**Figure 4:** Forest Plot for externalising problems (YSR) after 12 months; Systemic Therapy (ST) vs. Cognitive Behavioural Therapy (CBT); Mental and behavioural disorders due to psychoactive substance use

Systemic therapy (ST) vs. Cognitive behavioural therapy (CBT)  
 Externalising problems, CBCL, 12 months  
 Fixed effect model - inverse variance

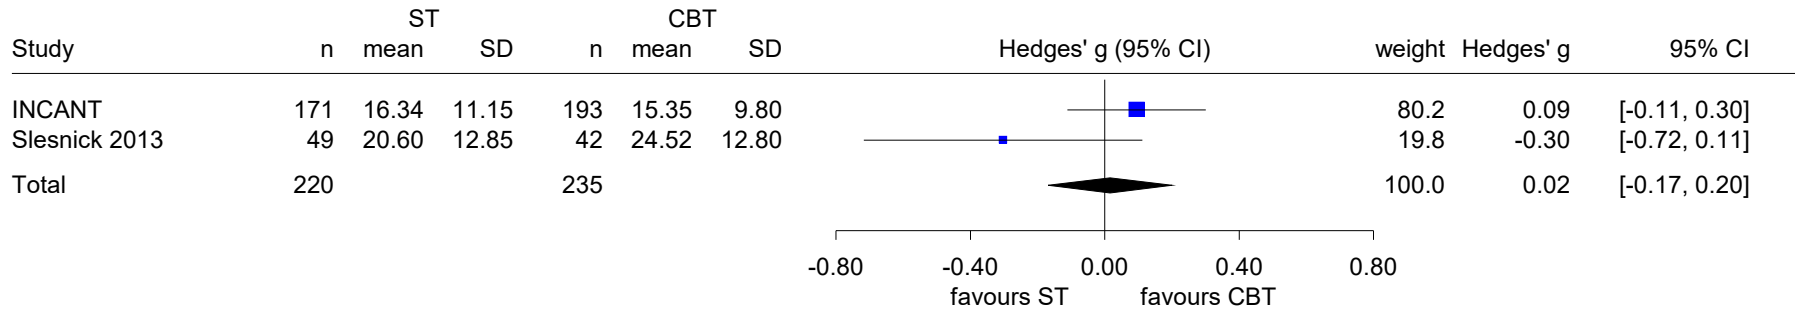

Heterogeneity:  $Q=2.83$ ,  $df=1$ ,  $p=0.092$ ,  $I^2=64.7\%$   
 Overall effect: Z-Score=0.17,  $p=0.867$

**Figure 5:** Forest Plot for externalising problems (CBCL) after 12 months; Systemic Therapy (ST) vs. Cognitive Behavioural Therapy (CBT); Mental and behavioural disorders due to psychoactive substance use

Systemic therapy (ST) vs. Cognitive behavioural therapy (CBT)  
 Externalising problems, YSR, 18 months  
 Random effects model - Knapp and Hartung

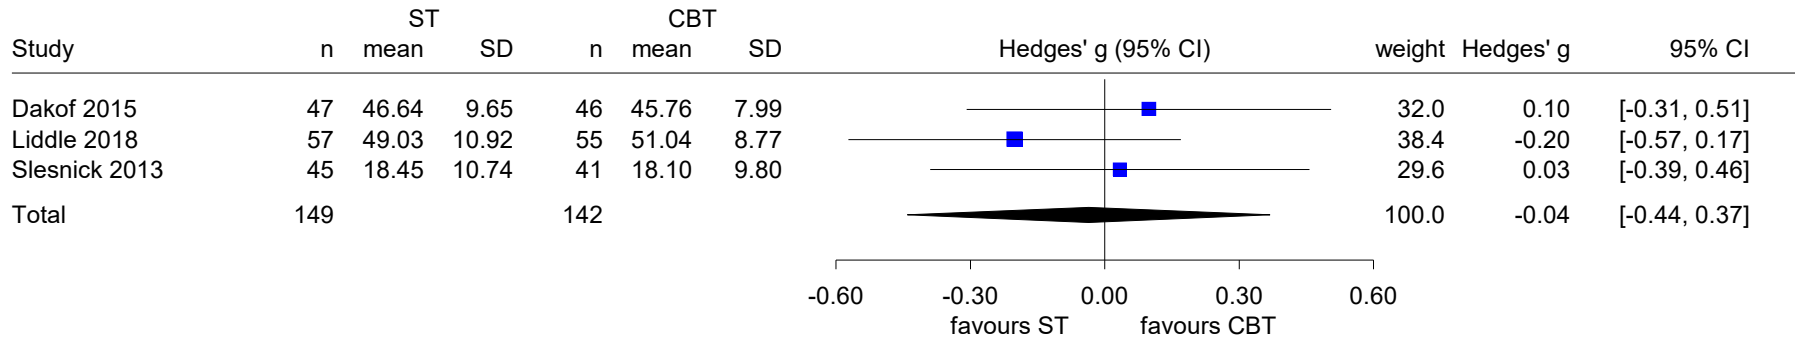

Heterogeneity:  $Q=1.28$ ,  $df=2$ ,  $p=0.526$ ,  $I^2=0\%$

Overall effect: Z-Score=-0.38,  $p=0.740$ ,  $\tau(Paule-Mandel)=0$

**Figure 6:** Forest Plot for externalising problems (YSR) after 18 months; Systemic Therapy (ST) vs. Cognitive Behavioural Therapy (CBT); Mental and behavioural disorders due to psychoactive substance use

Systemic therapy (ST) vs. Cognitive behavioural therapy (CBT)

Externalising problems, YSR, 24 months

Fixed effect model - inverse variance

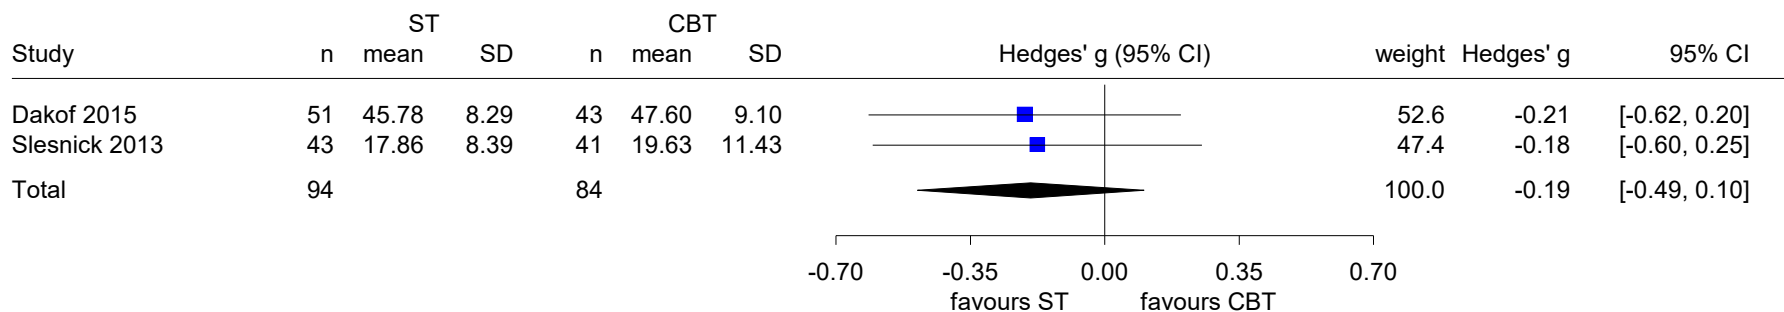

Heterogeneity:  $Q=0.01$ ,  $df=1$ ,  $p=0.914$ ,  $I^2=0\%$

Overall effect: Z-Score=-1.28,  $p=0.201$

**Figure 7:** Forest Plot for externalising problems (YSR) after 24 months; Systemic Therapy (ST) vs. Cognitive Behavioural Therapy (CBT); Mental and behavioural disorders due to psychoactive substance use

Systemic therapy (ST) vs. Cognitive behavioural therapy (CBT)  
 Internalising problems, YSR, 4 or 6 months  
 Random effects model - Knapp and Hartung (variance corr.)

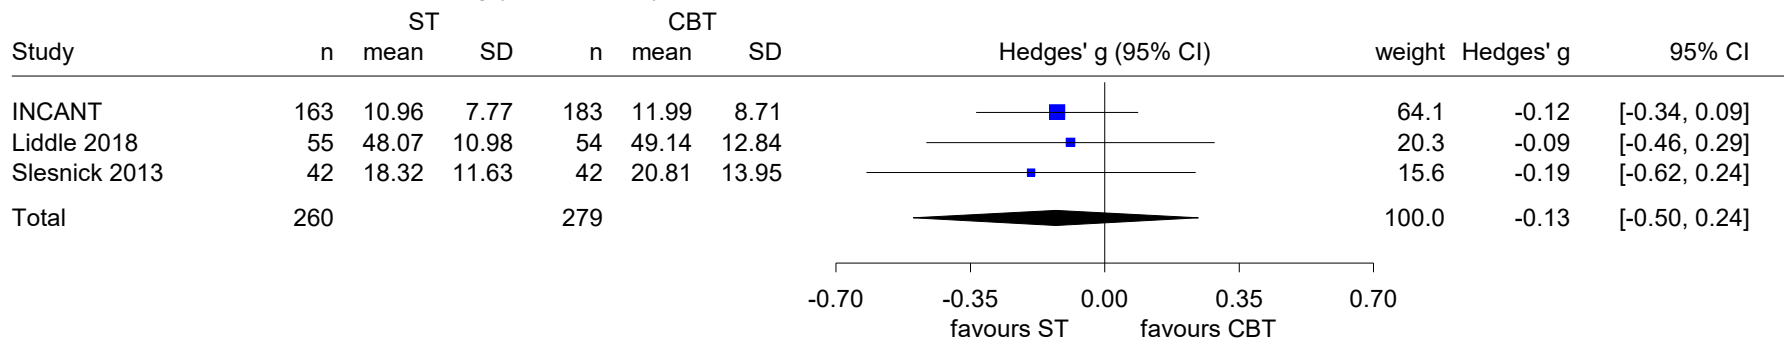

Heterogeneity:  $Q=0.13$ ,  $df=2$ ,  $p=0.938$ ,  $I^2=0\%$   
 Overall effect: Z-Score=-1.48,  $p=0.278$ ,  $\tau(Paule-Mandel)=0$

**Figure 8:** Forest Plot for internalising problems (YSR) after 4 or 6 months; Systemic Therapy (ST) vs. Cognitive Behavioural Therapy (CBT); Mental and behavioural disorders due to psychoactive substance use



Systemic therapy (ST) vs. Cognitive behavioural therapy (CBT)  
 Internalising problems, CBCL, 6 months  
 Fixed effect model - inverse variance

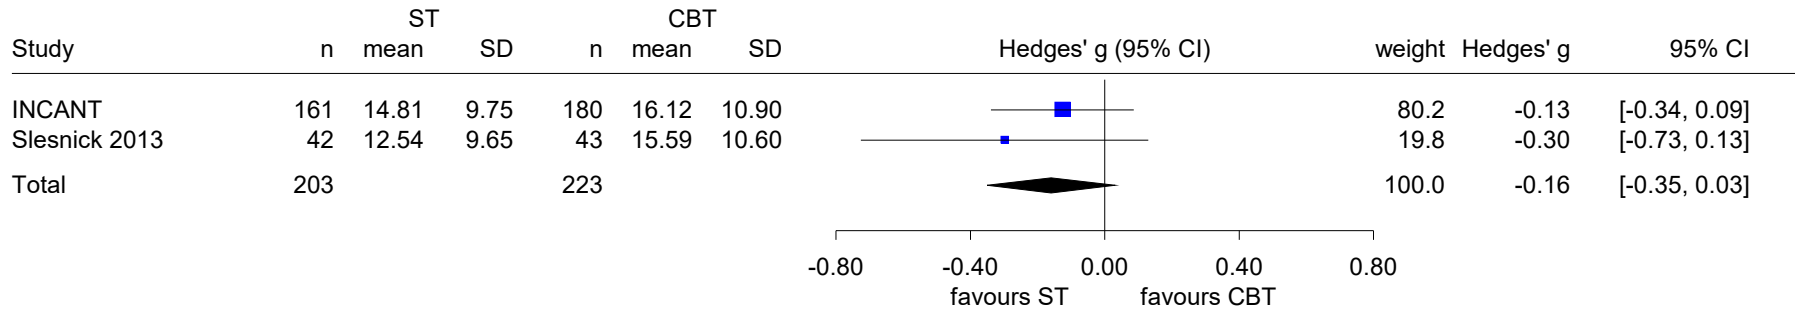

Heterogeneity:  $Q=0.50$ ,  $df=1$ ,  $p=0.480$ ,  $I^2=0\%$   
 Overall effect: Z-Score=-1.65,  $p=0.099$

**Figure 9:** Forest Plot for internalising problems (CBCL) after 6 months; Systemic Therapy (ST) vs. Cognitive Behavioural Therapy (CBT); Mental and behavioural disorders due to psychoactive substance use

Systemic therapy (ST) vs. Cognitive behavioural therapy (CBT)  
 Internalising problems, YSR, 12 months  
 Random effects model - Knapp and Hartung

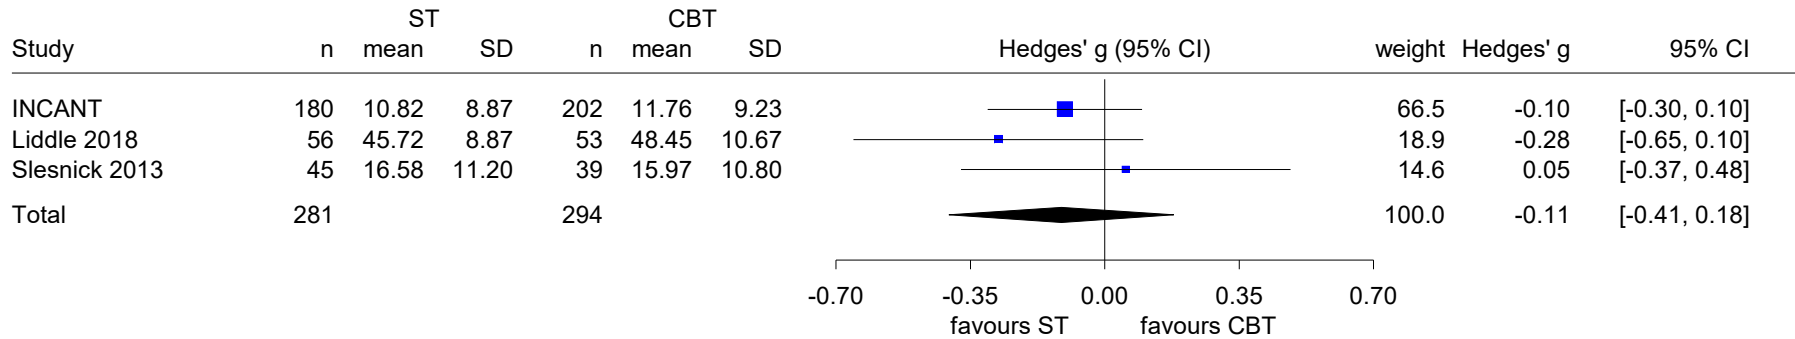

Heterogeneity:  $Q=1.32$ ,  $df=2$ ,  $p=0.516$ ,  $I^2=0\%$

Overall effect: Z-Score=-1.66,  $p=0.238$ ,  $\tau(Paule-Mandel)=0$

**Figure 10:** Forest Plot for internalising problems (YSR) after 12 months; Systemic Therapy (ST) vs. Cognitive Behavioural Therapy (CBT); Mental and behavioural disorders due to psychoactive substance use

Systemic therapy (ST) vs. Cognitive behavioural therapy (CBT)  
 Internalising problems, CBCL, 12 months  
 Fixed effect model - inverse variance

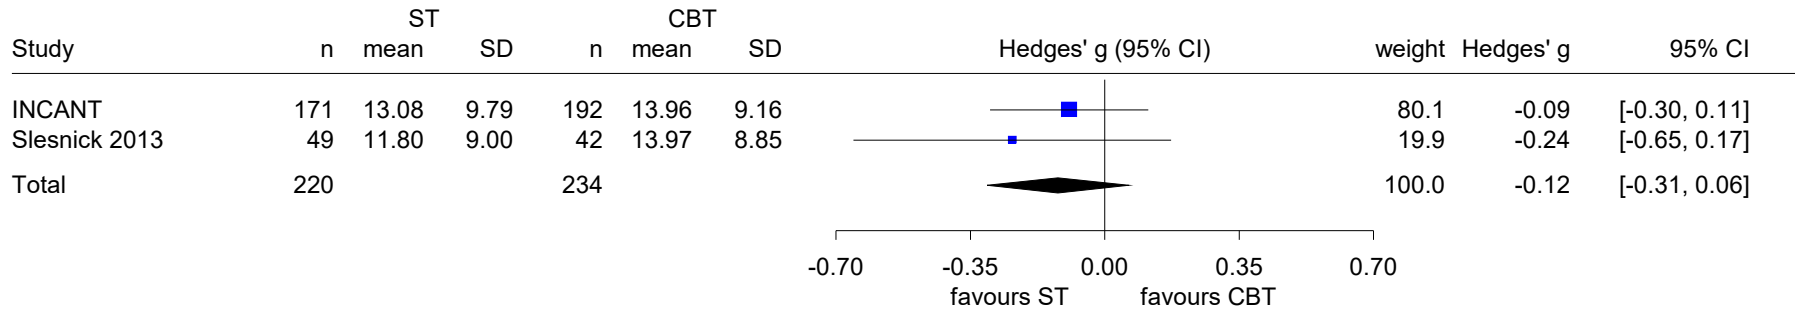

Heterogeneity:  $Q=0.39$ ,  $df=1$ ,  $p=0.530$ ,  $I^2=0\%$   
 Overall effect:  $Z\text{-Score}=-1.30$ ,  $p=0.194$

**Figure 11:** Forest Plot for internalising problems (CBCL) after 12 months; Systemic Therapy (ST) vs. Cognitive Behavioural Therapy (CBT); Mental and behavioural disorders due to psychoactive substance use

Systemic therapy (ST) vs. Cognitive behavioural therapy (CBT)  
 Internalising problems, YSR, 18 months  
 Fixed effect model - inverse variance

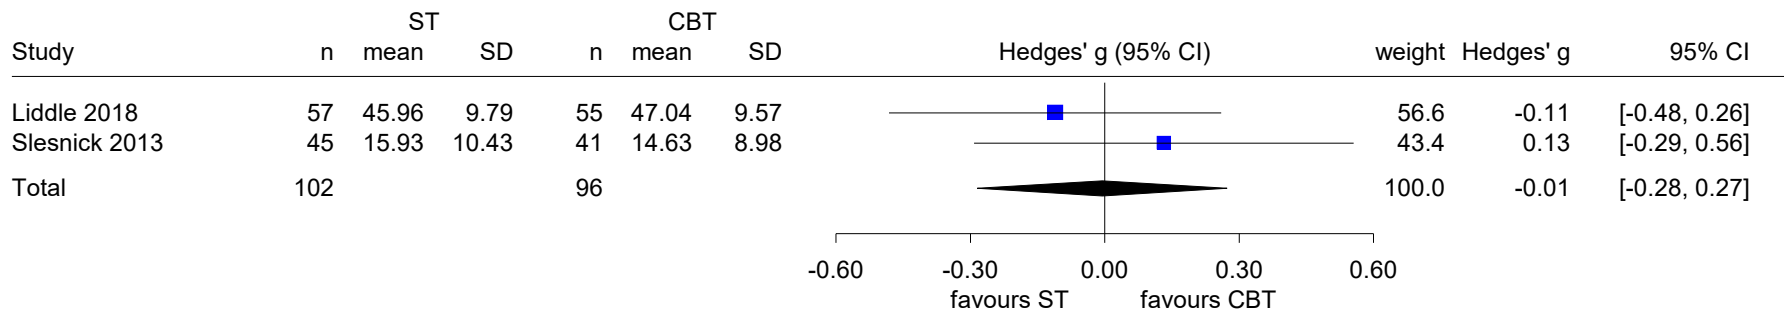

Heterogeneity:  $Q=0.71$ ,  $df=1$ ,  $p=0.398$ ,  $I^2=0\%$   
 Overall effect: Z-Score=-0.04,  $p=0.969$

**Figure 12:** Forest Plot for internalising problems (YSR) after 18 months; Systemic Therapy (ST) vs. Cognitive Behavioural Therapy (CBT); Mental and behavioural disorders due to psychoactive substance use

Systemic therapy (ST) vs. Cognitive behavioural therapy (CBT)  
 Substance use problem severity, PEI/PIC, 4 or 6 months  
 Random effects model - Knapp and Hartung

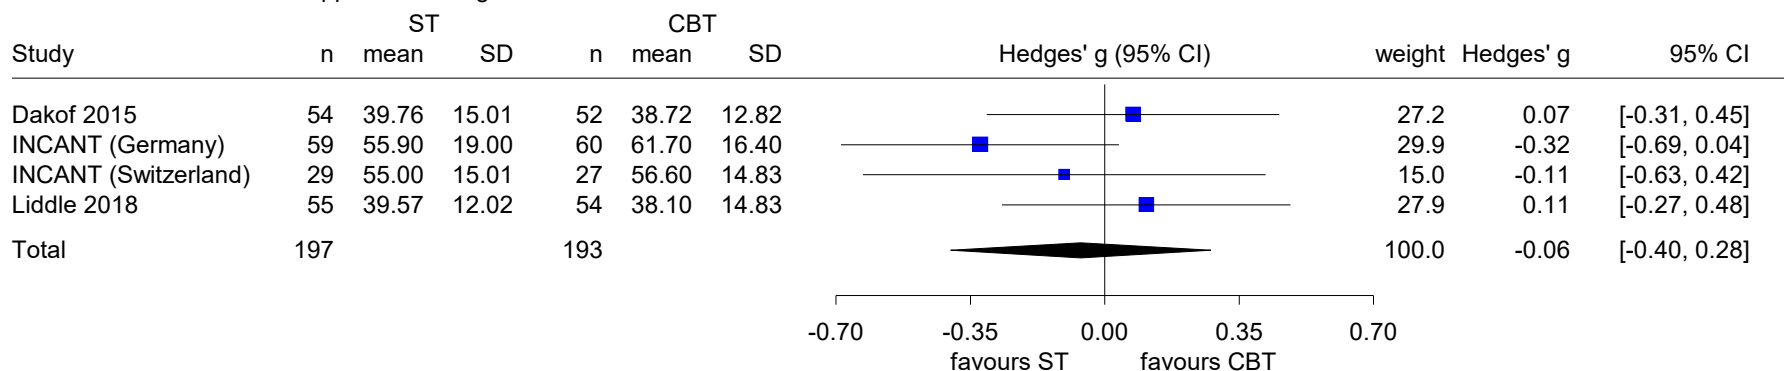

Heterogeneity:  $Q=3.33$ ,  $df=3$ ,  $p=0.343$ ,  $I^2=10.0\%$   
 Overall effect:  $Z\text{-Score}=-0.59$ ,  $p=0.598$ ,  $\text{Tau(Paule-Mandel)}=0.063$

**Figure 13:** Forest Plot for substance use problem severity after 4 or 6 months; Systemic Therapy (ST) vs. Cognitive Behavioural Therapy (CBT); Mental and behavioural disorders due to psychoactive substance use; missing standard deviation (SD) in INCANT (Switzerland) replaced by median of other studies

Systemic therapy (ST) vs. Cognitive behavioural therapy (CBT)  
 Substance use problem severity, PEI/PIC, 9 months  
 Fixed effect model - inverse variance

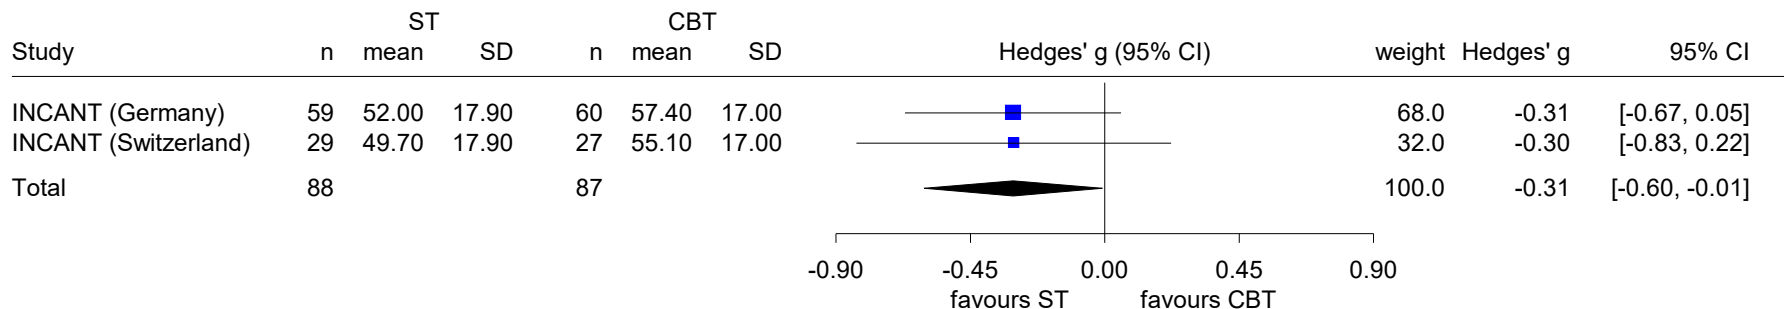

Heterogeneity:  $Q=0.00$ ,  $df=1$ ,  $p=0.993$ ,  $I^2=0\%$   
 Overall effect: Z-Score=-2.01,  $p=0.044$

**Figure 14:** Forest Plot for substance use problem severity after 9 months; Systemic Therapy (ST) vs. Cognitive Behavioural Therapy (CBT); Mental and behavioural disorders due to psychoactive substance use; missing standard deviation (SD) in INCANT (Switzerland) replaced by median of other studies



Systemic therapy (ST) vs. Cognitive behavioural therapy (CBT)  
 Substance use problem severity, PEI/PIC, 18 months  
 Fixed effect model - inverse variance

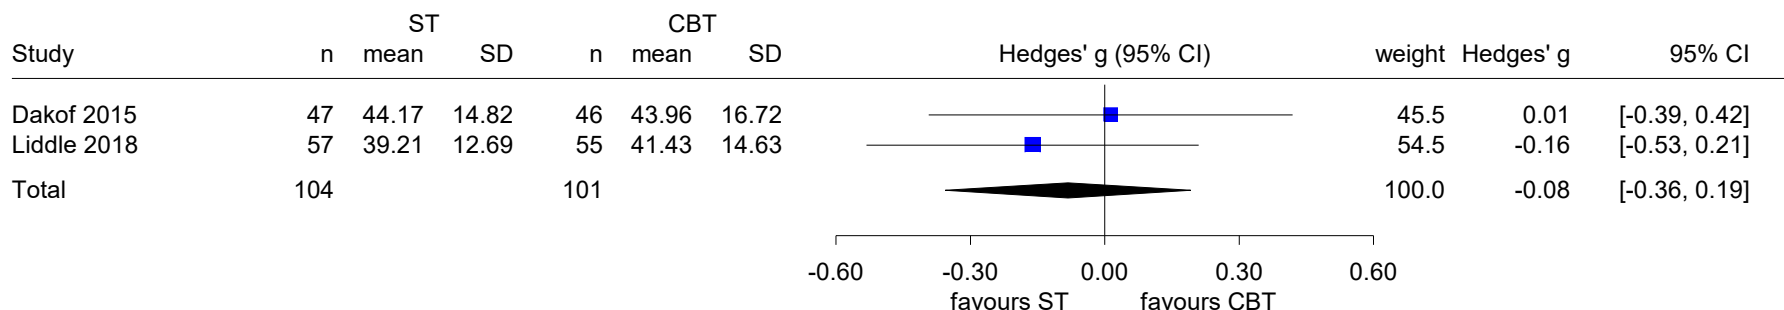

Heterogeneity:  $Q=0.39$ ,  $df=1$ ,  $p=0.535$ ,  $I^2=0\%$   
 Overall effect:  $Z\text{-Score}=-0.59$ ,  $p=0.558$

**Figure 16:** Forest Plot for substance use problem severity after 18 months; Systemic Therapy (ST) vs. Cognitive Behavioural Therapy (CBT); Mental and behavioural disorders due to psychoactive substance use

Systemic therapy (ST) vs. Cognitive behavioural therapy (CBT)  
 Use of cannabis, TLFB, 3 or 4 months  
 Fixed effect model - inverse variance (for presentation of the weights)

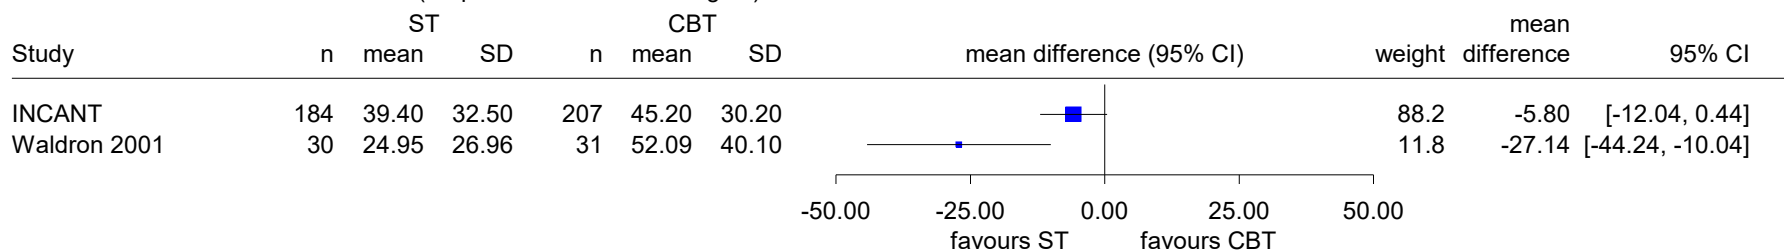

Heterogeneity:  $Q=5.28$ ,  $df=1$ ,  $p=0.022$ ,  $I^2=81.1\%$

**Figure 17:** Forest Plot for use of cannabis after 3 or 4 months; Systemic Therapy (ST) vs. Cognitive Behavioural Therapy (CBT); Mental and behavioural disorders due to psychoactive substance use; missing patient numbers in Waldron 2001 replaced with randomised patients



Systemic therapy (ST) vs. Cognitive behavioural therapy (CBT)

Use of cannabis, TLFB, 6 or 7 months

Fixed effect model - inverse variance

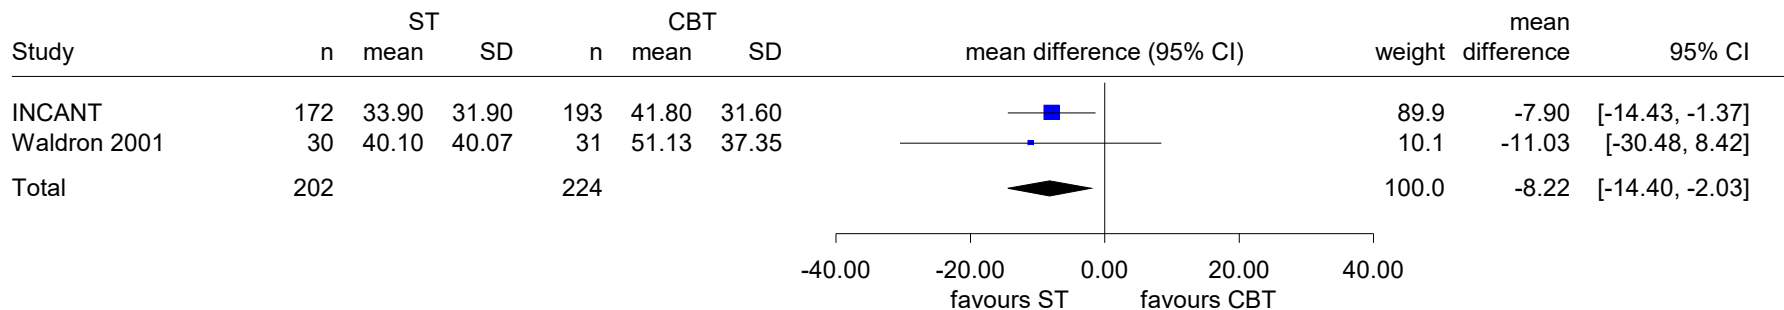

Heterogeneity:  $Q=0.09$ ,  $df=1$ ,  $p=0.765$ ,  $I^2=0\%$

Overall effect: Z-Score=-2.60,  $p=0.009$

**Figure 18:** Forest Plot for use of cannabis after 6 or 7 months; Systemic Therapy (ST) vs. Cognitive Behavioural Therapy (CBT); Mental and behavioural disorders due to psychoactive substance use

## References

1. Page MJ, McKenzie JE, Bossuyt PM, Boutron I, Hoffmann TC, Mulrow CD, et al. The PRISMA 2020 statement: an updated guideline for reporting systematic reviews. *BMJ*. 2021;372:n71.
2. Institut für Qualität und Wirtschaftlichkeit im Gesundheitswesen. Systemische Therapie als Psychotherapieverfahren bei Kindern und Jugendlichen; Abschlussbericht [Abschlussbericht/ -dokument]. 2023 [updated 27.01.2023; cited N21-03. Final report/document; 1507:[Available from: [https://www.iqwig.de/download/n21-03\\_systemische-therapie-bei-kindern-und-jugendlichen\\_abschlussbericht\\_v1-0.pdf](https://www.iqwig.de/download/n21-03_systemische-therapie-bei-kindern-und-jugendlichen_abschlussbericht_v1-0.pdf)].
3. Wong SS, Wilczynski NL, Haynes RB. Comparison of top-performing search strategies for detecting clinically sound treatment studies and systematic reviews in MEDLINE and EMBASE. *J Med Libr Assoc*. 2006;94(4):451-5.
4. Lefebvre C, Glanville J, Briscoe S, Littlewood A, Marshall C, Metzendorf MI, et al. Cochrane Handbook for Systematic Reviews of Interventions; Version 6.2; Technical Supplement to Chapter 4: Searching for and selecting studies 2021 [Available from: <https://training.cochrane.org/handbook/version-6.1/chapter-4-tech-suppl>].
5. Eady AM, Wilczynski NL, Haynes RB, Team H. PsycINFO search strategies identified methodologically sound therapy studies and review articles for use by clinicians and researchers. *J Clin Epidemiol*. 2008;61(1):34-40.
6. Barbe RP, Bridge J, Birmaher B, Kolko D, Brent DA. Suicidality and its relationship to treatment outcome in depressed adolescents. *Suicide Life Threat Behav*. 2004;34(1):44-55.
7. Barbe RP, Bridge JA, Birmaher B, Kolko DJ, Brent DA. Lifetime history of sexual abuse, clinical presentation, and outcome in a clinical trial for adolescent depression. *J Clin Psychiatry*. 2004;65(1):77-83.
8. Birmaher B, Brent DA, Kolko D, Baugher M, Bridge J, Holder D, et al. Clinical outcome after short-term psychotherapy for adolescents with major depressive disorder. *Arch Gen Psychiatry*. 2000;57(1):29-36.
9. Brent DA, Baugher M, Birmaher B, Kolko DJ, Bridge J. Compliance with recommendations to remove firearms in families participating in a clinical trial for adolescent depression. *J Am Acad Child Adolesc Psychiatry*. 2000;39(10):1220-6.
10. Brent DA, Birmaher B, Kolko D, Baugher M, Bridge J. Subsyndromal depression in adolescents after a brief psychotherapy trial: course and outcome. *J Affect Disord*. 2001;63(1-3):51-8.

11. Brent DA, Holder D, Kolko D, Birmaher B, Baugher M, Roth C, et al. A clinical psychotherapy trial for adolescent depression comparing cognitive, family, and supportive therapy. *Arch Gen Psychiatry*. 1997;54(9):877-85.
12. Brent DA, Kolko DJ, Birmaher B, Baugher M, Bridge J. A clinical trial for adolescent depression: predictors of additional treatment in the acute and follow-up phases of the trial. *J Am Acad Child Adolesc Psychiatry*. 1999;38(3):263-70.
13. Brent DA, Kolko DJ, Birmaher B, Baugher M, Bridge J, Roth C, et al. Predictors of treatment efficacy in a clinical trial of three psychosocial treatments for adolescent depression. *J Am Acad Child Adolesc Psychiatry*. 1998;37(9):906-14.
14. Bridge JA, Barbe RP, Birmaher B, Kolko DJ, Brent DA. Emergent suicidality in a clinical psychotherapy trial for adolescent depression. *Am J Psychiatry*. 2005;162(11):2173-5.
15. Dietz LJ, Marshal MP, Burton CM, Bridge JA, Birmaher B, Kolko D, et al. Social problem solving among depressed adolescents is enhanced by structured psychotherapies. *J Consult Clin Psychol*. 2014;82(2):202-11.
16. Gaynor ST, Weersing VR, Kolko DJ, Birmaher B, Heo J, Brent DA. The prevalence and impact of large sudden improvements during adolescent therapy for depression: A comparison across cognitive-behavioral, family, and supportive therapy. *J Consult Clin Psychol*. 2003;71(2):386-93.
17. Kolko DJ, Brent DA, Baugher M, Bridge J, Birmaher B. Cognitive and family therapies for adolescent depression: treatment specificity, mediation, and moderation. *J Consult Clin Psychol*. 2000;68(4):603-14.
18. Renaud J, Brent DA, Baugher M, Birmaher B, Kolko DJ, Bridge J. Rapid response to psychosocial treatment for adolescent depression: a two-year follow-up. *J Am Acad Child Adolesc Psychiatry*. 1998;37(11):1184-90.
19. Stein D, Brent DA, Bridge J, Kolko D, Birmaher B, Baugher M. Predictors of parent-rated credibility in a clinical psychotherapy trial for adolescent depression. *J Psychother Pract Res*. 2001;10(1):1-7.
20. Lebowitz ER, Marin C, Martino A, Shimshoni Y, Silverman WK. Parent-based treatment as efficacious as cognitive-behavioral therapy for childhood anxiety: A randomized noninferiority study of supportive parenting for anxious childhood emotions. *J Am Acad Child Adolesc Psychiatry*. 2020;59(3):362-72.
21. Kircanski K, Peris TS. Exposure and response prevention process predicts treatment outcome in youth with OCD. *J Abnorm Child Psychol*. 2015;43(3):543-52.
22. Peris TS, Piacentini J. Optimizing treatment for complex cases of childhood obsessive compulsive disorder: a preliminary trial. *J Clin Child Adolesc Psychol*. 2013;42(1):1-8.

23. Peris TS, Rozenman MS, Sugar CA, McCracken JT, Piacentini J. Targeted Family Intervention for Complex Cases of Pediatric Obsessive-Compulsive Disorder: A Randomized Controlled Trial. *J Am Acad Child Adolesc Psychiatry*. 2017;56(12).
24. University of California. Family Focused Treatment of Pediatric Obsessive Compulsive Disorder (PFIT) 2021 [Available from: <https://clinicaltrials.gov/ct2/show/NCT01409642>].
25. Siqueland L, Rynn M, Diamond GS. Cognitive behavioral and attachment based family therapy for anxious adolescents: Phase I and II studies. *J Anxiety Disord*. 2005;19(4):361-81.
26. Gorrell S, Kinasz K, Hail L, Bruett L, Forsberg S, Lock J, et al. Rituals and preoccupations associated with bulimia nervosa in adolescents: Does motivation to change matter? *Eur Eat Disord Rev*. 2019;27(3):323-8.
27. Le Grange D, Lock J, Agras WS, Bryson SW, Jo B. Randomized Clinical Trial of Family-Based Treatment and Cognitive-Behavioral Therapy for Adolescent Bulimia Nervosa. *J Am Acad Child Adolesc Psychiatry*. 2015;54(11).
28. Matheson BE, Gorrell S, Bohon C, Agras WS, Le Grange D, Lock J. Investigating Early Response to Treatment in a Multi-Site Study for Adolescent Bulimia Nervosa. *Frontiers in psychiatry*. 2020;11:92.
29. Valenzuela F, Lock J, Le Grange D, Bohon C. Comorbid depressive symptoms and self-esteem improve after either cognitive-behavioural therapy or family-based treatment for adolescent bulimia nervosa. *Eur Eat Disord Rev*. 2018;26(3):253-8.
30. Stanford University. Study of Treatment for Adolescents With Bulimia Nervosa 2015 [Available from: <https://ClinicalTrials.gov/show/NCT00879151>].
31. Nyman-Carlsson E, Birgegard A, Engstrom I, Gustafsson SA, Nevonen L. Predictors of outcome among young adult patients with anorexia nervosa in a randomised controlled trial. *Eur Eat Disord Rev*. 2019;27(1):76-85.
32. Nyman-Carlsson E, Norring C, Engstrom I, Gustafsson SA, Lindberg K, Paulson-Karlsson G, et al. Individual cognitive behavioral therapy and combined family/individual therapy for young adults with Anorexia nervosa: A randomized controlled trial. *Psychotherapy Research*. 2020;30(8):1011-25.
33. Anorexia Bulimia Unit Child Adolescent Psychiatry Centre. The Gothenburg anorexia nervosa treatment study - a randomized control trial comparing individual cognitive behavioral therapy (I-CBT) and family therapy (FT) for young adults with anorexia nervosa 2019 [Available from: <https://www.isrctn.com/ISRCTN25181390>].
34. Perkins S, Schmidt U, Eisler I, Treasure J, Yi I, Winn S, et al. Why do adolescents with bulimia nervosa choose not to involve their parents in treatment? *European Child and Adolescent Psychiatry, Supplement*. 2005;14(7):376-85.

35. Schmidt U, Lee S, Beecham J, Perkins S, Treasure J, Yi I, et al. A randomized controlled trial of family therapy and cognitive behavior therapy guided self-care for adolescents with bulimia nervosa and related disorders. *Am J Psychiatry*. 2007;164(4):591-8.
36. Schmidt U, Lee S, Perkins S, Eisler I, Treasure J, Beecham J, et al. Do adolescents with eating disorder not otherwise specified or full-syndrome bulimia nervosa differ in clinical severity, comorbidity, risk factors, treatment outcome or cost? *Int J Eat Disord*. 2008;41(6):498-504.
37. The Health Foundation. A randomized controlled evaluation of the cost effectiveness of cognitive-behavioural guided self-care versus family therapy for adolescent bulimia nervosa in a catchment area-based population 2007 [Available from: <https://www.isrctn.com/ISRCTN70120585>].
38. Boyer BE, Doove LL, Geurts HM, Prins PJ, Van Mechelen I, Van der Oord S. Qualitative Treatment-Subgroup Interactions in a Randomized Clinical Trial of Treatments for Adolescents with ADHD: Exploring What Cognitive-Behavioral Treatment Works for Whom. *PLoS One*. 2016;11(3):e0150698.
39. Boyer BE, Geurts HM, Prins PJ, Van der Oord S. Two novel CBTs for adolescents with ADHD: the value of planning skills. *Eur Child Adolesc Psychiatry*. 2015;24(9):1075-90.
40. Boyer BE, Geurts HM, Prins PJ, Van der Oord S. One-year follow-up of two novel CBTs for adolescents with ADHD. *Eur Child Adolesc Psychiatry*. 2016;25(3):333-7.
41. University of Amsterdam. Training adolescents with ADHD to plan and organize: investigating short- and longterm effects of treatment. 2022 [Available from: <https://trialssearch.who.int/Trial2.aspx?TrialID=NTR2142>].
42. Bursleson JA, Kaminer Y, Dennis ML. Absence of iatrogenic or contagion effects in adolescent group therapy: findings from the Cannabis Youth Treatment (CYT) study. *Am J Addict*. 2006;15 Suppl 1:4-15.
43. Dennis M, Godley SH, Diamond G, Tims FM, Babor T, Donaldson J, et al. The Cannabis Youth Treatment (CYT) Study: main findings from two randomized trials. *J Subst Abuse Treat*. 2004;27(3):197-213.
44. Dennis M, Titus JC, Diamond G, Donaldson J, Godley SH, Tims FM, et al. The Cannabis Youth Treatment (CYT) experiment: rationale, study design and analysis plans. *Addiction*. 2002;97 Suppl 1:16-34.
45. Diamond G, Godley SH, Liddle HA, Sampl S, Webb C, Tims FM, et al. Five outpatient treatment models for adolescent marijuana use: a description of the Cannabis Youth Treatment Interventions. *Addiction*. 2002;97 Suppl 1:70-83.

46. French MT, Roebuck MC, Dennis ML, Diamond G, Godley SH, Tims F, et al. The economic cost of outpatient marijuana treatment for adolescents: findings from a multi-site field experiment. *Addiction*. 2002;97 Suppl 1:84-97.
47. French MT, Roebuck MC, Dennis ML, Godley SH, Liddle HA, Tims FM. Outpatient marijuana treatment for adolescents. Economic evaluation of a multisite field experiment. *Eval Rev*. 2003;27(4):421-59.
48. Liddle HA. Multidimensional family therapy for adolescent cannabis users Rockville (USA): U.S. Department of Health and Human Services; 2002 [Available from: <http://lib.adai.washington.edu/clearinghouse/downloads/Multidimensional-Family-Therapy-for-Adolescent-Cannabis-Users-207.pdf>].
49. Dakof GA, Henderson CE, Rowe CL, Boustani M, Greenbaum PE, Wang W, et al. A randomized clinical trial of family therapy in juvenile drug court. *J Fam Psychol*. 2015;29(2):232-41.
50. University of Miami. Family-Based Juvenile Drug Court Services 2012 [Available from: <https://ClinicalTrials.gov/show/NCT01668303>].
51. Gantner A. [Multidimensional family therapy for adolescent clients with cannabis use disorders--Results and experience from the INCANT pilot study]. *Prax Kinderpsychol Kinderpsychiatr*. 2006;55(7):520-32.
52. Goorden M, van der Schee E, Hendriks VM, Hakkaart-van Roijen L. Cost-effectiveness of multidimensional family therapy compared to cognitive behavioral therapy for adolescents with a cannabis use disorder: Data from a randomized controlled trial. *Drug Alcohol Depend*. 2016;162:154-61.
53. Grichting E, Haug S, Nielsen P, Schaub M. INCANT Hauptstudie; Nationaler Schlussbericht Schweiz. Zürich: Institut für Sucht- und Gesundheitsforschung; 2011.
54. Har A, Bonnaire C. The end of INCANT: The transition phase from research to clinical work. *Thérapie Familiale*. 2013;34(4):529-41.
55. Hendriks V, van der Schee E, Blanken P. Treatment of adolescents with a cannabis use disorder: main findings of a randomized controlled trial comparing multidimensional family therapy and cognitive behavioral therapy in The Netherlands. *Drug Alcohol Depend*. 2011;119(1-2):64-71.
56. Hendriks V, van der Schee E, Blanken P. Matching adolescents with a cannabis use disorder to multidimensional family therapy or cognitive behavioral therapy: treatment effect moderators in a randomized controlled trial. *Drug Alcohol Depend*. 2012;125(1-2):119-26.

57. Hendriks VM, van der Schee E, Blanken P. [Multidimensional family therapy and cognitive behavioral therapy in adolescents with a cannabis use disorder: a randomised controlled study]. *Tijdschrift voor Psychiatrie*. 2013;55(10):747-59.
58. Lascaux M, Bastard N, Bonnaire C, Couteron J-P, Phan O. INCANT: Comparison of two formalized therapeutic models. *Alcoologie et Addictologie*. 2010;32(3):209-19.
59. Lascaux M, Phan O. [Comparison of European therapies for cannabis addiction among adolescents]. *Encephale*. 2015;41 Suppl 1:S21-8.
60. Phan O, Bonnaire C, Bastard N, Jouanne C. INCANT project. *Psychotropes*. 2009;14(3-4):137-56.
61. Phan O, Henderson CE, Angelidis T, Weil P, van Toorn M, Rigter R, et al. European youth care sites serve different populations of adolescents with cannabis use disorder. Baseline and referral data from the INCANT trial. *BMC Psychiatry*. 2011;11:110.
62. Phan O, Jouanne C, Monge S. A random clinical trial concerning the psychotherapy of adolescents addicted to cannabis. [French]. *Ann Med Psychol (Paris)*. 2010;168(2):145-51.
63. Pol TM, Hendriks V, Rigter H, Cohn MD, Doreleijers TAH, Domburgh L, et al. Multidimensional family therapy in adolescents with a cannabis use disorder: Long-term effects on delinquency in a randomized controlled trial. *Child Adolesc Psychiatry Ment Health*. 2018;12(1):44.
64. Rigter H, Henderson CE, Pelc I, Tossmann P, Phan O, Hendriks V, et al. Multidimensional family therapy lowers the rate of cannabis dependence in adolescents: a randomised controlled trial in Western European outpatient settings. *Drug Alcohol Depend*. 2013;130(1-3):85-93.
65. Rigter H, Pelc I, Tossmann P, Phan O, Grichting E, Hendriks V, et al. INCANT: a transnational randomized trial of multidimensional family therapy versus treatment as usual for adolescents with cannabis use disorder. *BMC Psychiatry*. 2010;10:28.
66. Rowe C, Rigter H, Henderson C, Gantner A, Mos K, Nielsen P, et al. Implementation fidelity of Multidimensional Family Therapy in an international trial. *J Subst Abuse Treat*. 2013;44(4):391-9.
67. Schaub MP, Henderson CE, Pelc I, Tossmann P, Phan O, Hendriks V, et al. Multidimensional family therapy decreases the rate of externalising behavioural disorder symptoms in cannabis abusing adolescents: outcomes of the INCANT trial. *BMC Psychiatry*. 2014;14:26.
68. Tossmann P, Jonas B. Ergebnisbericht der kontrollierten Behandlungsstudie INCANT. Berlin: Delphi-Gesellschaft für Forschung, Beratung und Prokjektentwicklung; 2010.

69. Tossmann P, Jonas B, Rigter H, Gantner A. Treating adolescents with cannabis use disorder with Multidimensional Family Therapy (MDFT): Main results of a Randomized Controlled Trial (RCT). [German]. *Sucht*. 2012;58(3):157-66.
70. van der Pol TM, Henderson CE, Hendriks V, Schaub MP, Rigter H. Multidimensional Family Therapy Reduces Self-Reported Criminality Among Adolescents With a Cannabis Use Disorder. *Int J Offender Ther Comp Criminol*. 2018;62(6):1573-88.
71. Verbanck P, Pelc I, Glaesener M, Gladsteen Y, Spapen P. INCANT final report; Period: November 2006-April 2010. Brüssel: CHU Brugmann; 2010.
72. Erasmus Medical Centre. The effectiveness of outpatient multidimensional family therapy (MDFT) compared with outpatient treatment as usual in adolescents with a cannabis use disorder and other problem behaviour: a multicentre, trans-national randomised controlled trial 2018 [Yes. Available from: <https://www.isrctn.com/ISRCTN51014277>].
73. The Netherlands Ministry of Health, Welfare and Sport. The effectiveness of multidimensional family therapy (MDFT) versus cognitive behavioural therapy (CBT) in Dutch adolescents with a cannabis use disorder: a randomised controlled trial 2020 [Available from: <https://www.isrctn.com/ISRCTN00179361>].
74. Chinchilla P. Comorbidity as a moderator of process-outcome relations in individual and family therapy for adolescent substance abuse. New York: Fordham University; 2007. 6954 p.
75. Dauber S. Treatment focus in individual and family therapy for adolescent drug abuse. New York: Fordham University; 2004.
76. Henderson CE, Dakof GA, Greenbaum PE, Liddle HA. Effectiveness of multidimensional family therapy with higher severity substance-abusing adolescents: report from two randomized controlled trials. *J Consult Clin Psychol*. 2010;78(6):885-97.
77. Hogue A, Dauber S, Liddle HA, Samuolis J. Linking Session Focus to Treatment Outcome in Evidence-Based Treatments for Adolescent Substance Abuse. *Psychotherapy: Theory, Research, Practice, Training*. 2004;41(2):83-96.
78. Hogue A, Dauber S, Stambaugh LF, Cecero JJ, Liddle HA. Early therapeutic alliance and treatment outcome in individual and family therapy for adolescent behavior problems. *J Consult Clin Psychol*. 2006;74(1):121-9.
79. Hogue A, Henderson CE, Dauber S, Barajas PC, Fried A, Liddle HA. Treatment adherence, competence, and outcome in individual and family therapy for adolescent behavior problems. *J Consult Clin Psychol*. 2008;76(4):544-55.
80. Liddle HA, Dakof GA, Turner RM, Henderson CE, Greenbaum PE. Treating adolescent drug abuse: a randomized trial comparing multidimensional family therapy and cognitive behavior therapy. *Addiction*. 2008;103(10):1660-70.



81. Rowe CL, Liddle HA, Greenbaum PE, Henderson CE. Impact of psychiatric comorbidity on treatment of adolescent drug abusers. *J Subst Abuse Treat.* 2004;26(2):129-40.
82. Liddle HA, Dakof GA, Rowe CL, Henderson C, Greenbaum P, Wang W, et al. Multidimensional Family Therapy as a community-based alternative to residential treatment for adolescents with substance use and co-occurring mental health disorders. *J Subst Abuse Treat.* 2018;90:47-56.
83. University of Miami. Family-based and Adolescent Residential Drug Treatment 2012 [Available from: <https://ClinicalTrials.gov/show/NCT01737632>].
84. Guo X, Slesnick N, Feng X. Reductions in depressive symptoms among substance-abusing runaway adolescents and their primary caretakers: a randomized clinical trial. *J Fam Psychol.* 2014;28(1):98-105.
85. Guo X, Slesnick N, Feng X. Changes in Family Relationships among Substance Abusing Runaway Adolescents: A Comparison between Family and Individual Therapies. *J Marital Fam Ther.* 2016;42(2):299-312.
86. Slesnick N, Erdem G, Bartle-Haring S, Brigham GS. Intervention with substance-abusing runaway adolescents and their families: results of a randomized clinical trial. *J Consult Clin Psychol.* 2013;81(4):600-14.
87. Slesnick N, Guo X, Brakenhoff B, Feng X. Two-year predictors of runaway and homeless episodes following shelter services among substance abusing adolescents. *J Adolesc.* 2013;36(5):787-95.
88. Slesnick N, Guo X, Feng X. Change in parent- and child-reported internalizing and externalizing behaviors among substance abusing runaways: the effects of family and individual treatments. *J Youth Adolesc.* 2013;42(7):980-93.
89. French MT, Zavala SK, McCollister KE, Waldron HB, Turner CW, Ozechowski TJ. Cost-effectiveness analysis of four interventions for adolescents with a substance use disorder. *J Subst Abuse Treat.* 2008;34(3):272-81.
90. Waldron HB, Slesnick N, Brody JL, Turner CW, Peterson TR. Treatment outcomes for adolescent substance abuse at 4- and 7-month assessments. *J Consult Clin Psychol.* 2001;69(5):802-13.
91. Martín Andrés AM, Silva Mato AM. Choosing the optimal unconditioned test for comparing two independent proportions. *Computational Statistics & Data Analysis.* 1994;17(5):555-74.
